# Supplementary material for: How experienced robotic nurses adapt to the Hugo™ RAS system
Source: Springer Nature journal article supplement (doi:10.1007/s11701-024-01878-x), 2024-03-11

**Supplementary Figure 1** All of the Timelines of the work pattern of the robotic nurse team

# Surgery 1

07:40

08:52

10:04

11:16

12:28

13:40

Patient at the OR room

Patient under anesthesia

Scrub Nurse

Circulating Nurse

Supervised Circulating Nurse

Nurses released for a break

Nurse leaves OR room

Starting the robotic system

Unpacking of equipment

Draping of the robotic arms

Positioning of the patient

Preparation of the surgical field

Port Placement

Docking

Console Time

Undocking

Skin Closure

Change of instruments

Rinse of camera lens

Technical Errors

Equipment clean up

Preparing the patient for awakening

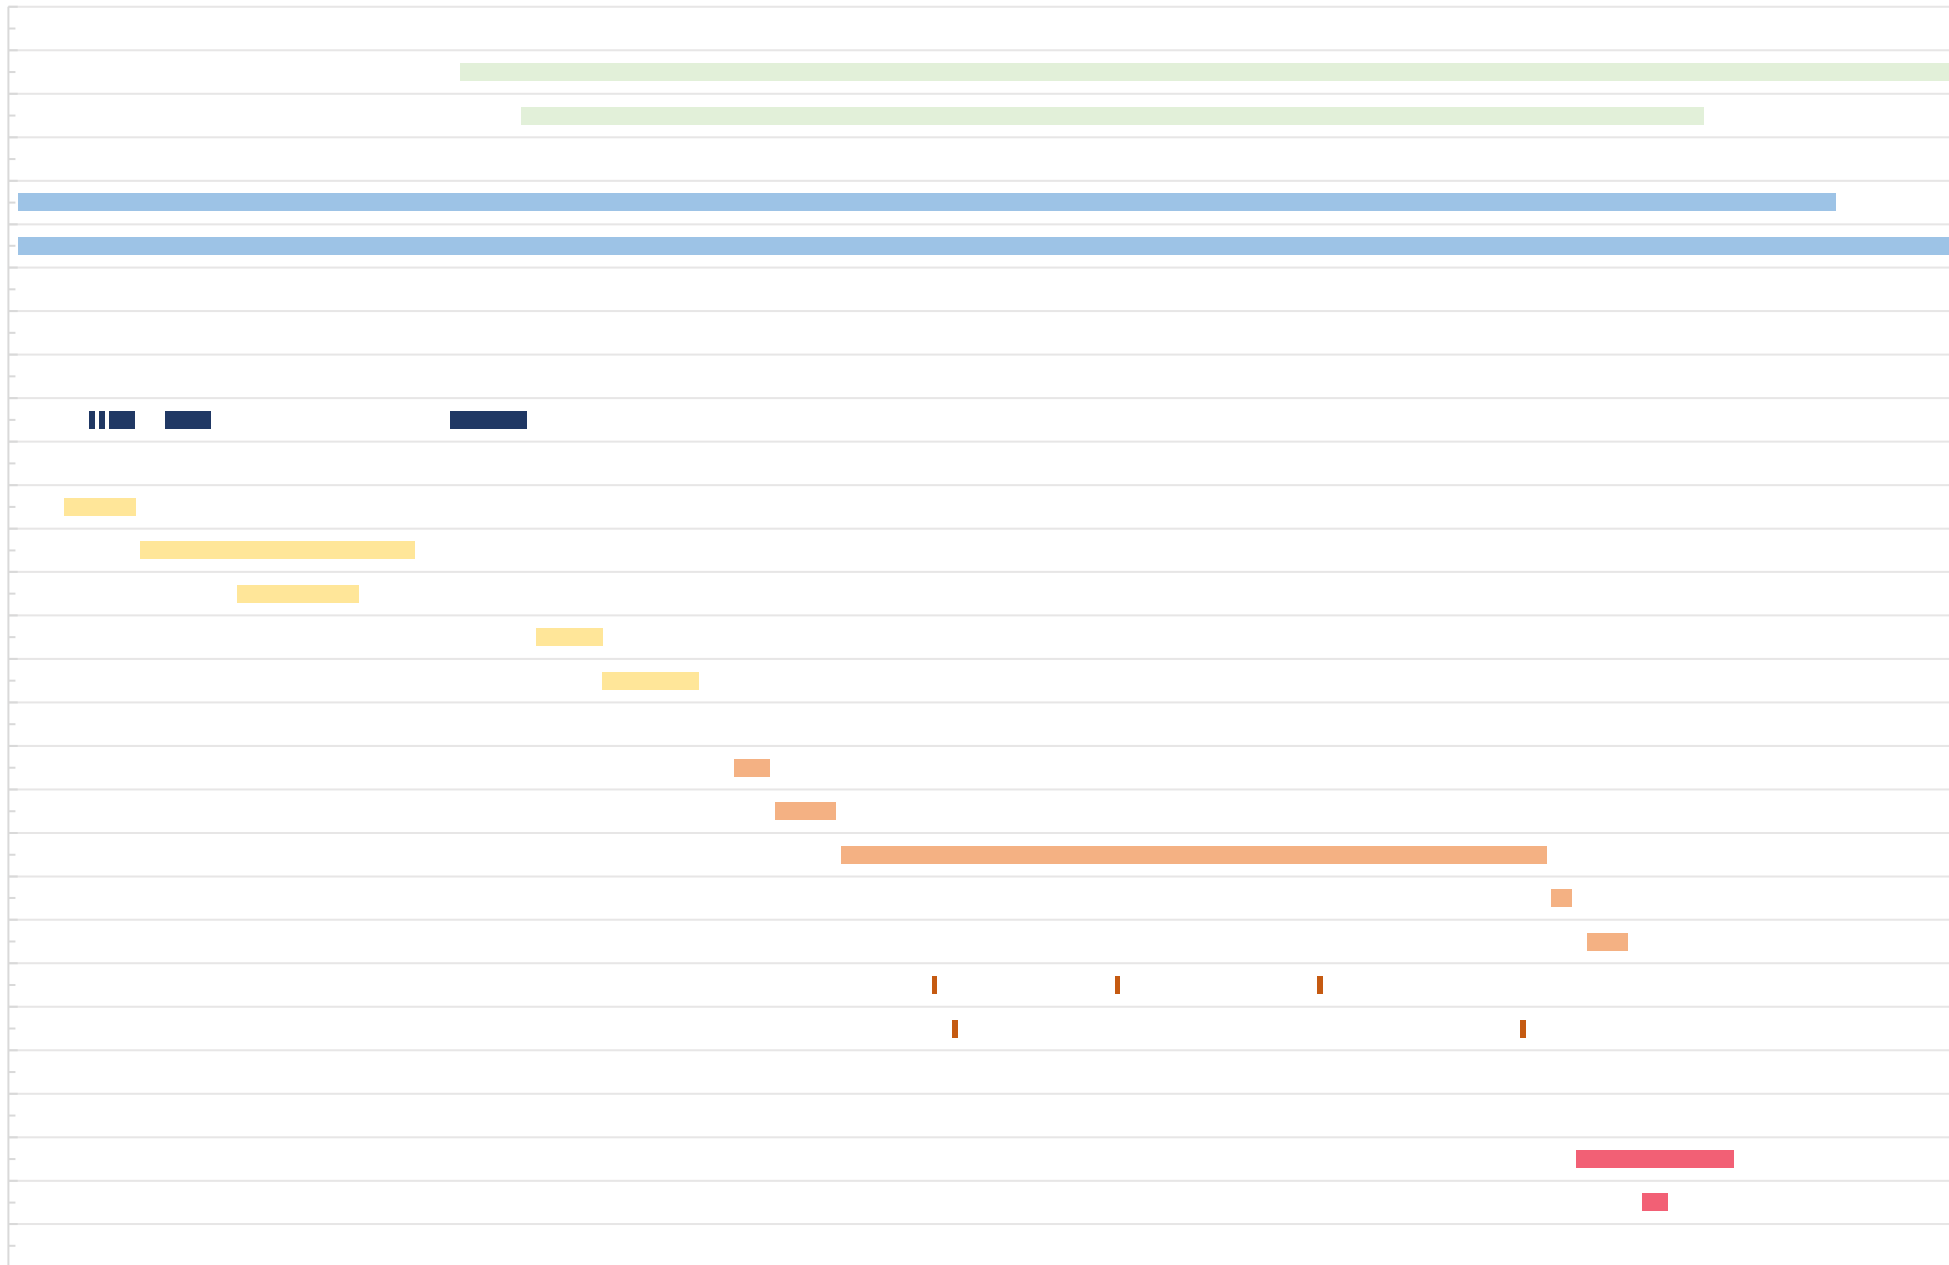

# Surgery 2

07:40

08:52

10:04

11:16

12:28

Patient at the OR room  
Patient under anesthesia

Scrub Nurse

Circulating Nurse

Supervised Circulating Nurse

Nurses released for a break

Nurse leaves OR room

Starting the robotic system

Unpacking of equipment

Draping of the robotic arms

Positioning of the patient

Preparation of the surgical field

Port Placement

Docking

Console Time

Undocking

Skin Closure

Change of instruments

Rinse of camera lens

Technical Errors

Equipment clean up

Preparing the patient for awakening

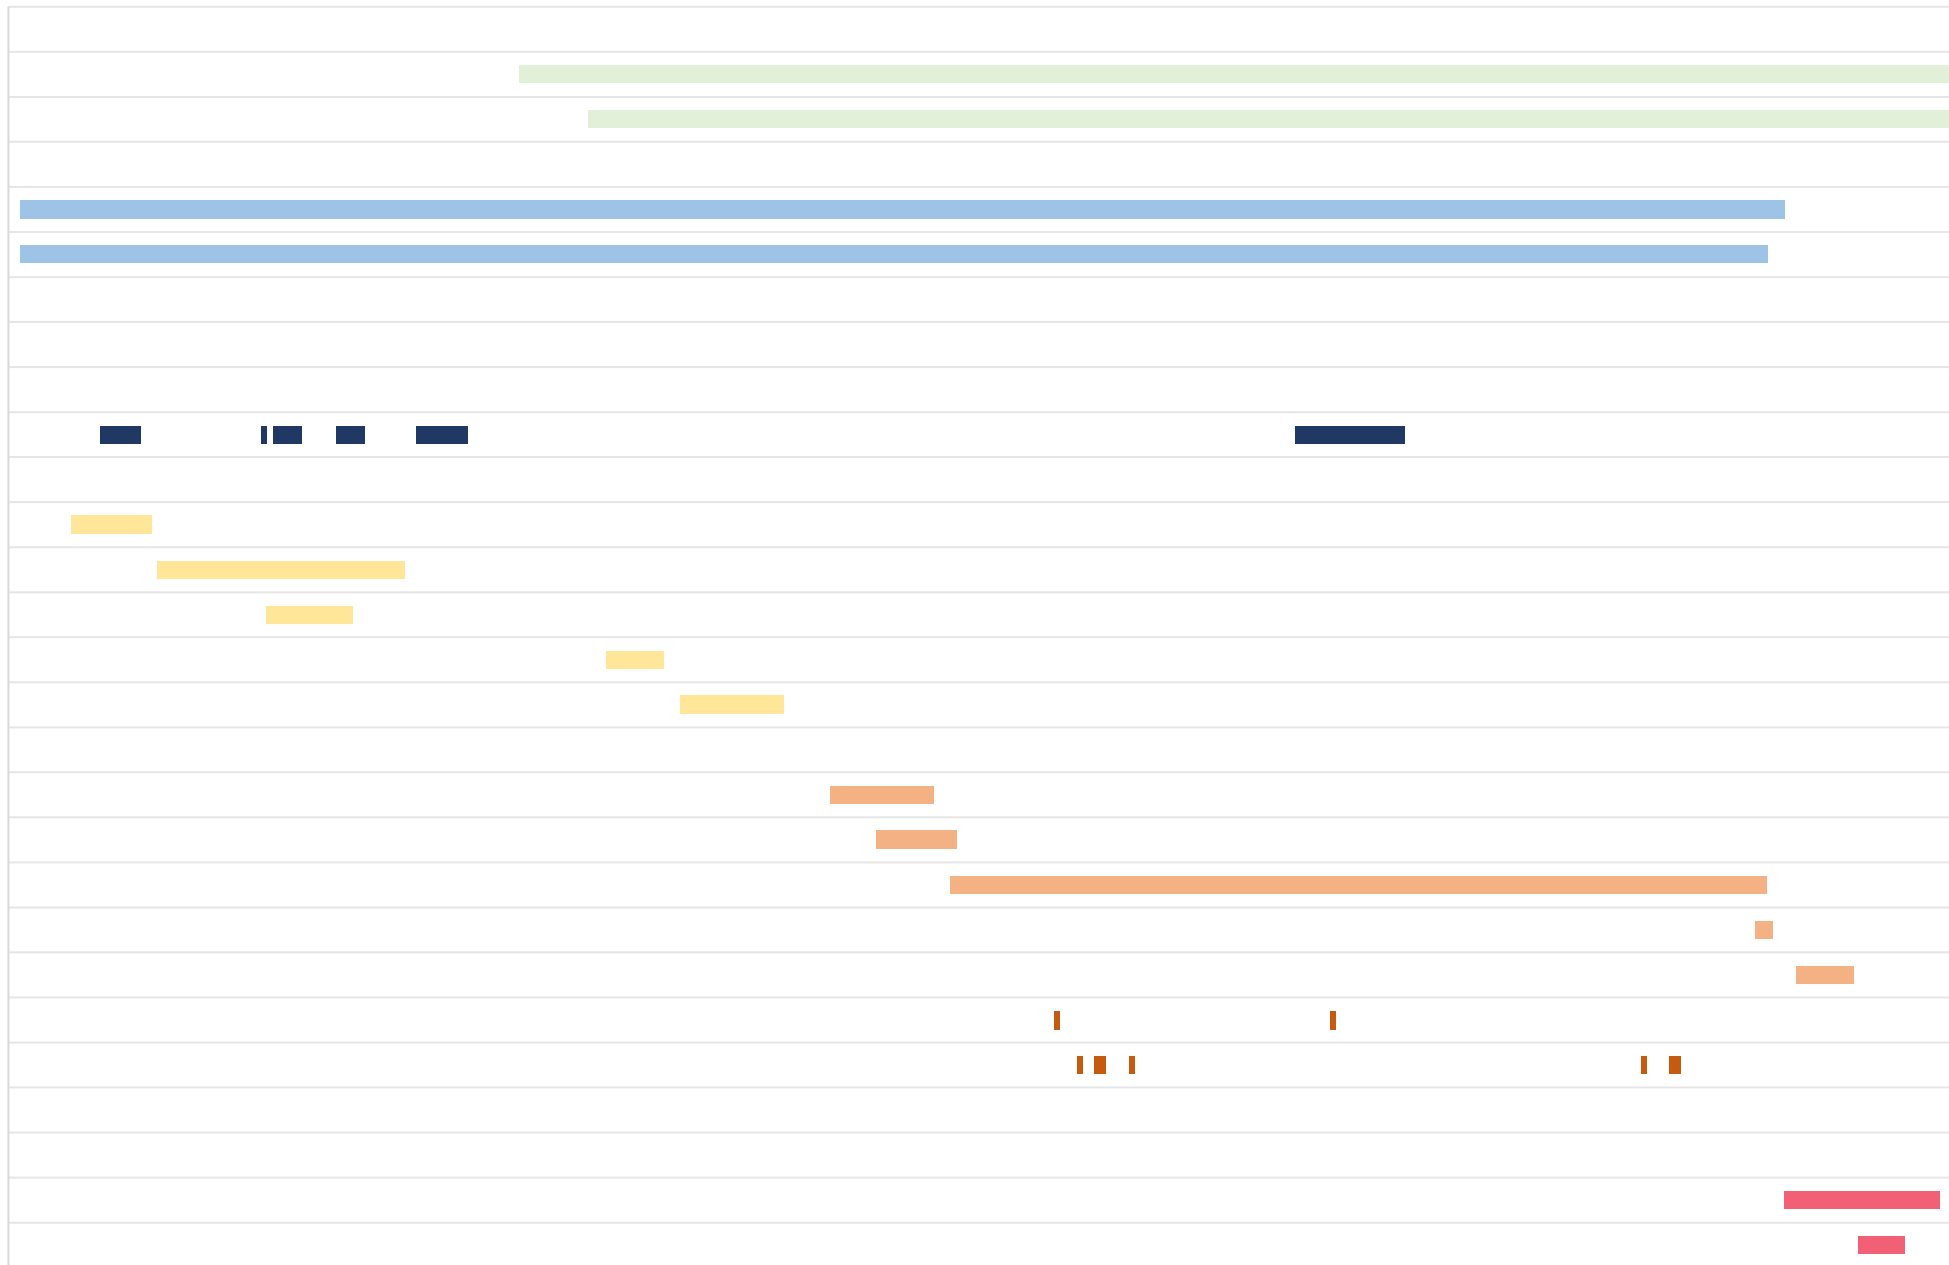

# Surgery 3

07:40

08:52

10:04

11:16

12:28

13:40

Patient at the OR room

Patient under anesthesia

Scrub Nurse

Circulating Nurse

Supervised Circulating Nurse

Nurses released for a break

Nurse leaves OR room

Starting the robotic system

Unpacking of equipment

Draping of the robotic arms

Positioning of the patient

Preparation of the surgical field

Port Placement

Docking

Console Time

Undocking

Skin Closure

Change of instruments

Rinse of camera lens

Technical Errors

Equipment clean up

Preparing the patient for awakening

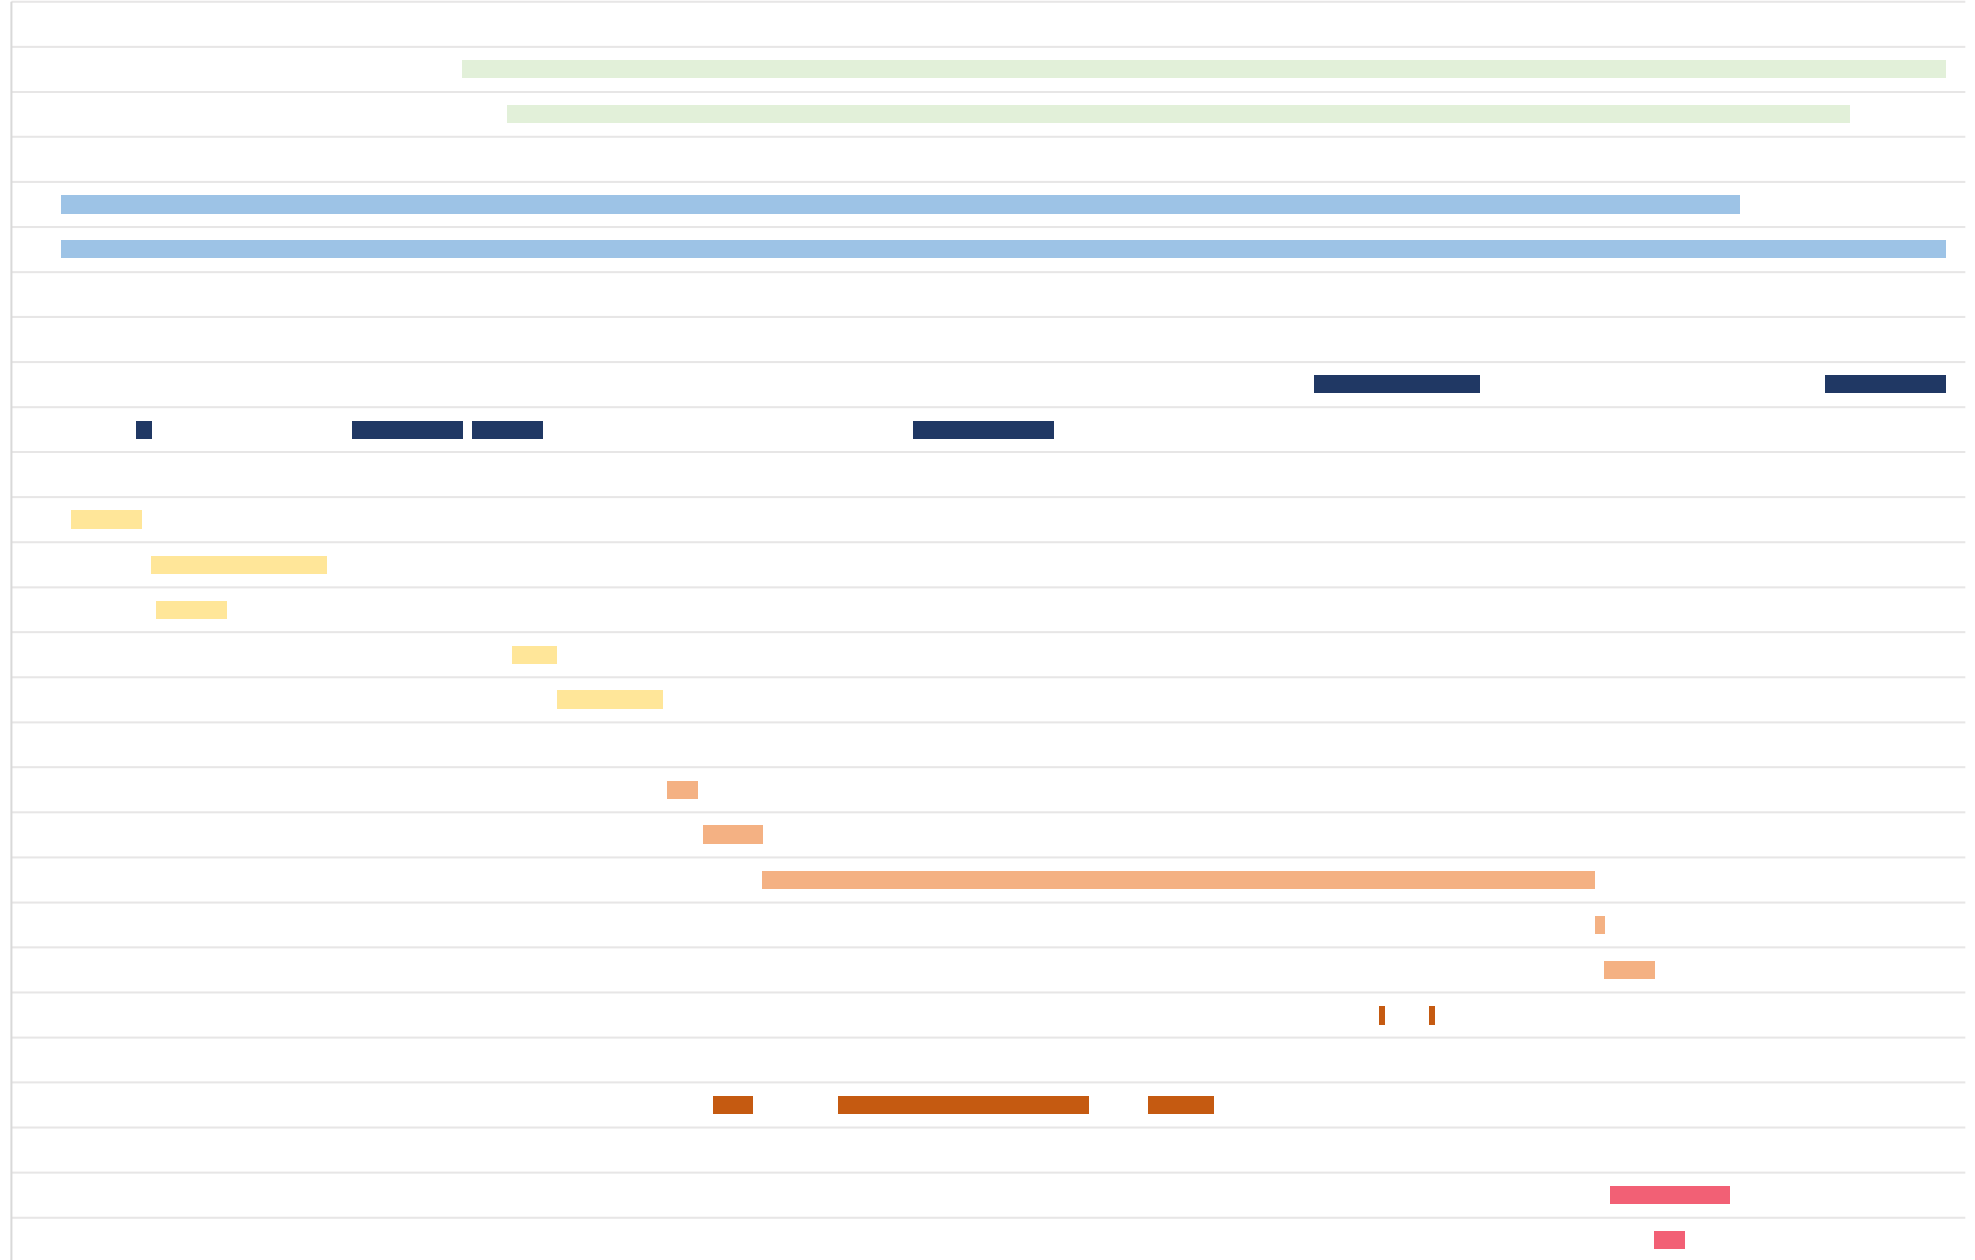

# Surgery 4

07:40

08:52

10:04

11:16

12:28

Patient at the OR room

Patient under anesthesia

Scrub Nurse

Circulating Nurse

Supervised Circulating Nurse

Nurses released for a break

Nurse leaves OR room

Starting the robotic system

Unpacking of equipment

Draping of the robotic arms

Positioning of the patient

Preparation of the surgical field

Port Placement

Docking

Console Time

Undocking

Skin Closure

Change of instruments

Rinse of camera lens

Technical Errors

Equipment clean up

Preparing the patient for awakening

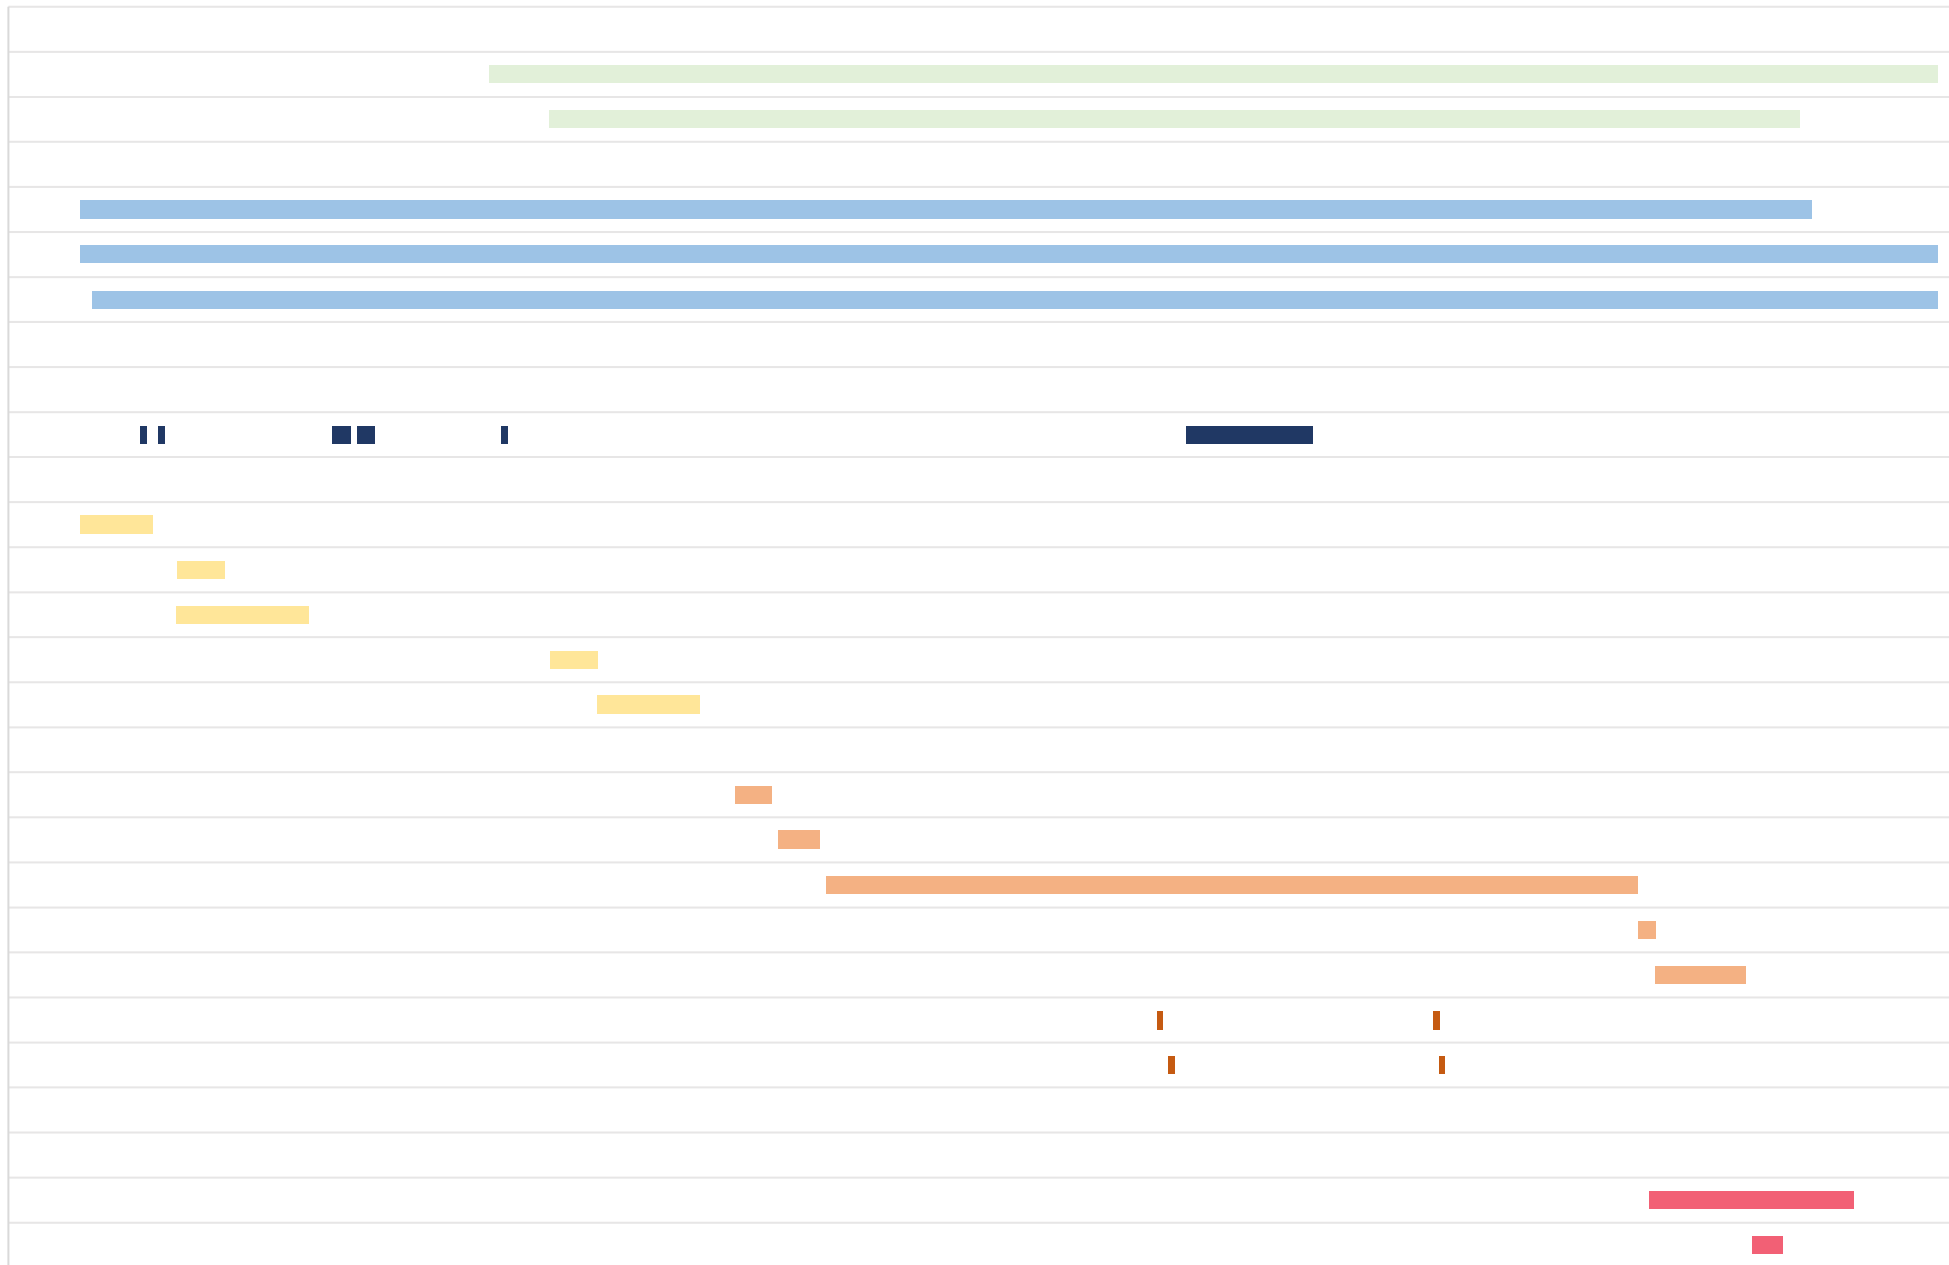

# Surgery 5

07:40

08:52

10:04

11:16

12:28

13:40

Patient at the OR room  
Patient under anesthesia

Scrub Nurse  
Circulating Nurse  
Supervised Circulating Nurse

Nurses released for a break  
Nurse leaves OR room

Starting the robotic system  
Unpacking of equipment  
Draping of the robotic arms  
Positioning of the patient  
Preparation of the surgical field

Port Placement  
Docking  
Console Time  
Undocking  
Skin Closure

Change of instruments  
Rinse of camera lens  
Technical Errors

Equipment clean up  
Preparing the patient for awakening

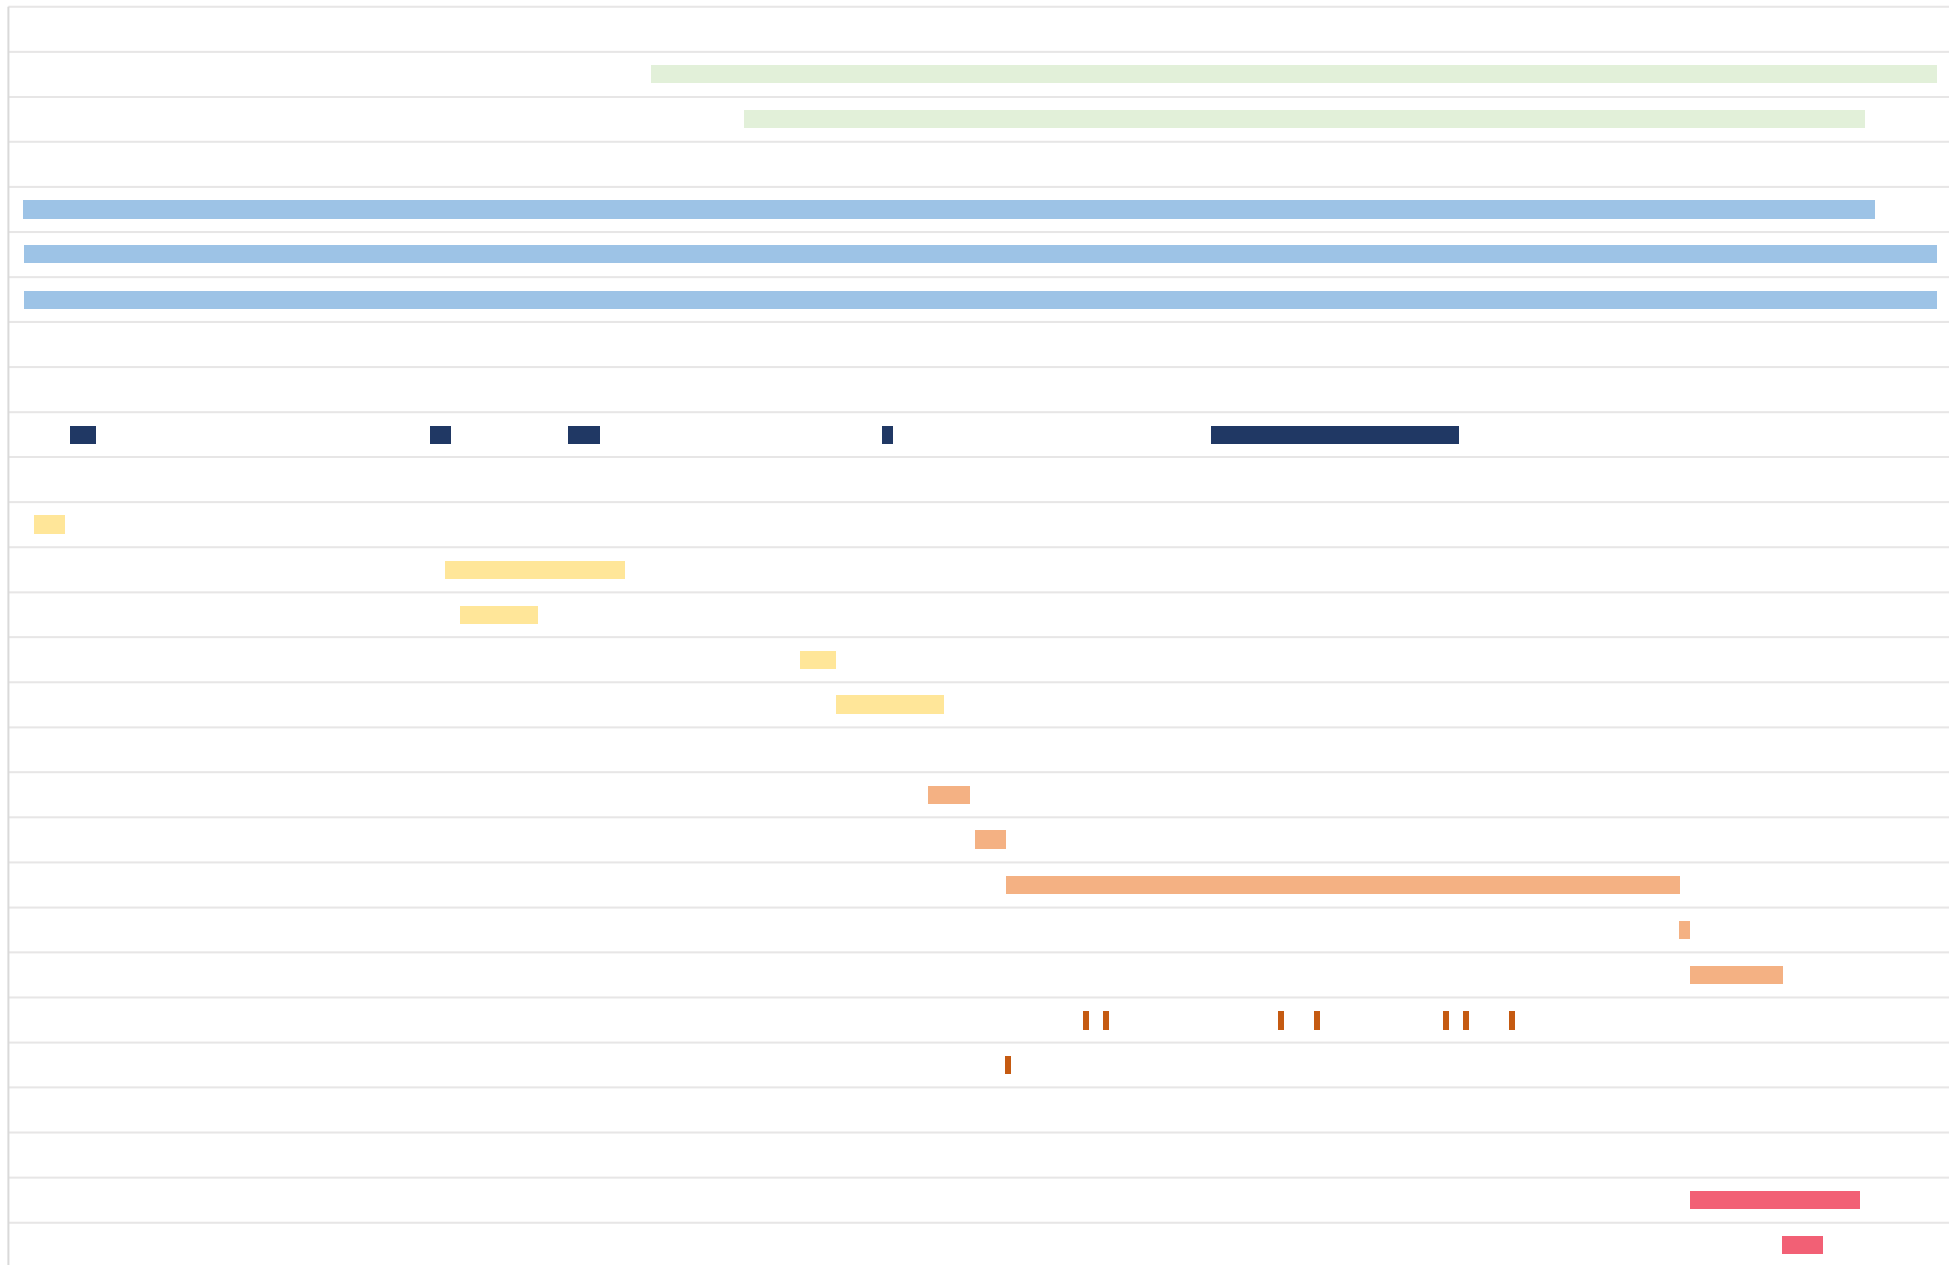

# Surgery 6

07:40

08:52

10:04

11:16

12:28

Patient at the OR room

Patient under anesthesia

Scrub Nurse

Circulating Nurse

Supervised Circulating Nurse

Nurses released for a break

Nurse leaves OR room

Starting the robotic system

Unpacking of equipment

Draping of the robotic arms

Positioning of the patient

Preparation of the surgical field

Port Placement

Docking

Console Time

Undocking

Skin Closure

Change of instruments

Rinse of camera lens

Technical Errors

Equipment clean up

Preparing the patient for awakening

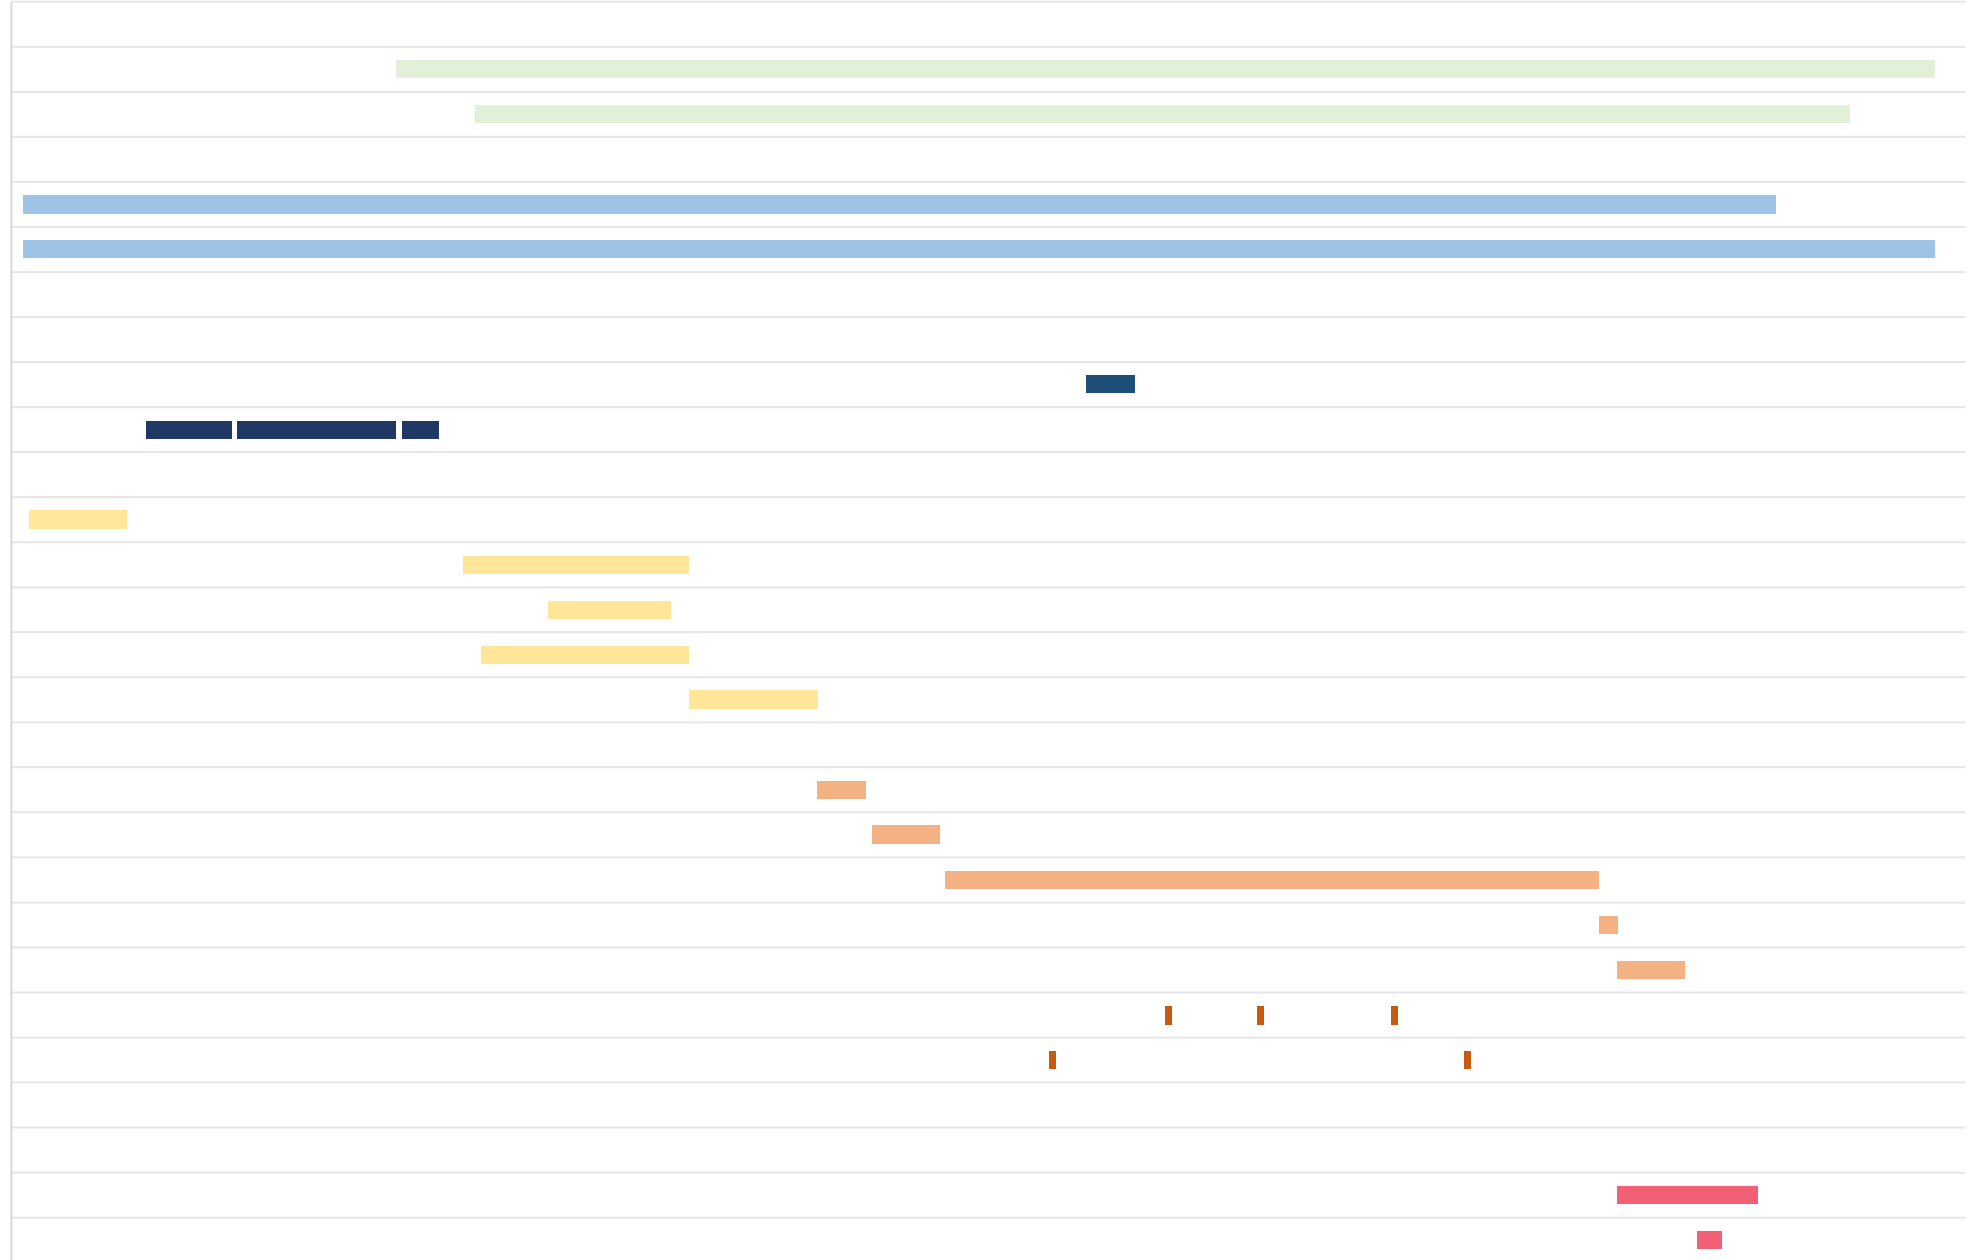

# Surgery 7

07:40

08:52

10:04

11:16

12:28

Patient at the OR room

Patient under anesthesia

Scrub Nurse

Circulating Nurse

Supervised Circulating Nurse

Nurses released for a break

Nurse leaves OR room

Starting the robotic system

Unpacking of equipment

Draping of the robotic arms

Positioning of the patient

Preparation of the surgical field

Port Placement

Docking

Console Time

Undocking

Skin Closure

Change of instruments

Rinse of camera lens

Technical Errors

Equipment clean up

Preparing the patient for awakening

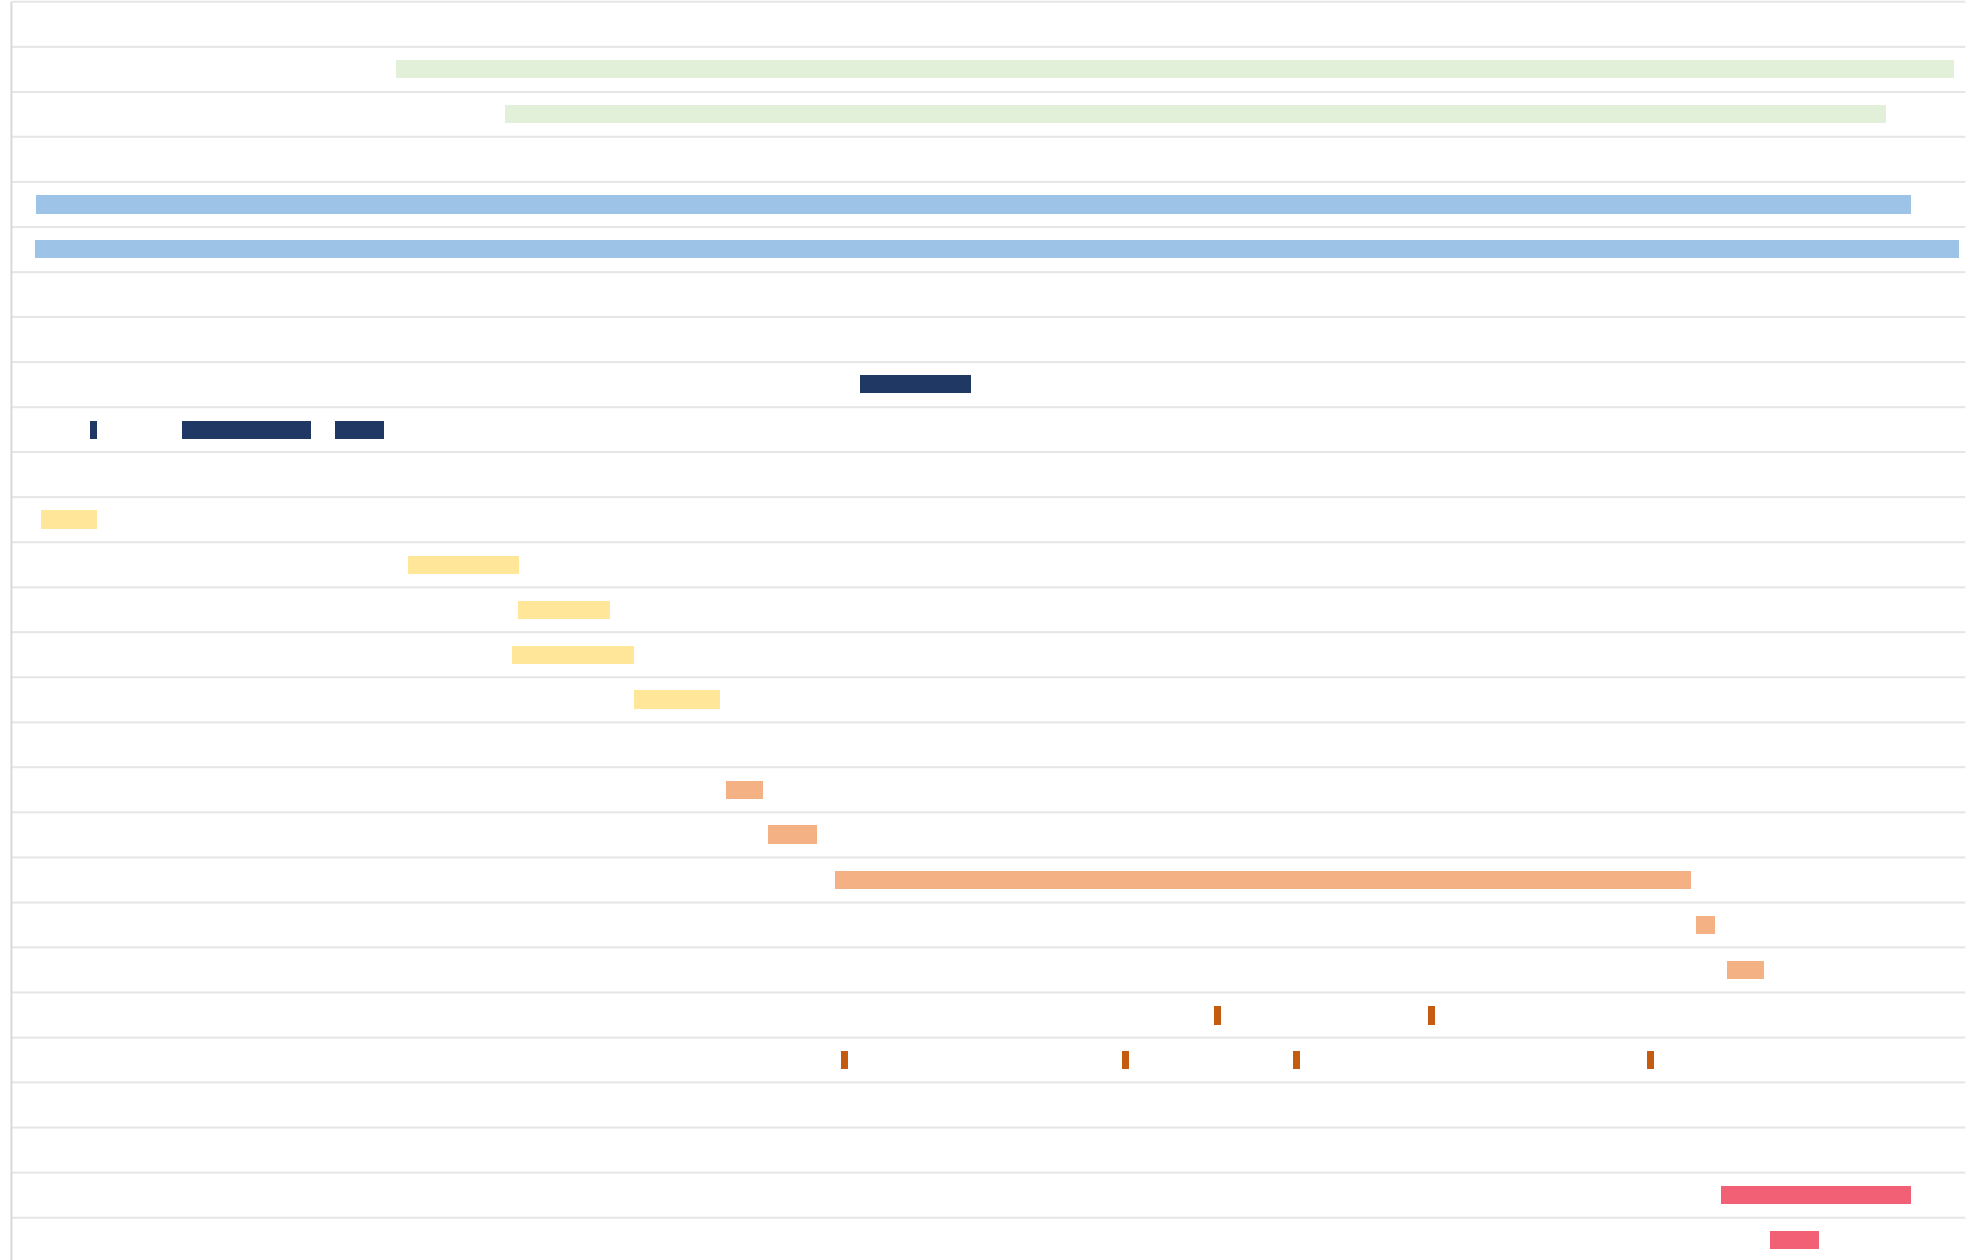



# Surgery 8

07:40

08:52

10:04

11:16

12:28

- Patient at the OR room
- Patient under anesthesia
- Scrub Nurse
- Circulating Nurse
- Supervised Circulating Nurse
- Nurses released for a break
- Nurse leaves OR room
- Starting the robotic system
- Unpacking of equipment
- Draping of the robotic arms
- Positioning of the patient
- Preparation of the surgical field
- Port Placement
- Docking
- Console Time
- Undocking
- Skin Closure
- Change of instruments
- Rinse of camera lens
- Technical Errors
- Equipment clean up
- Preparing the patient for awakening

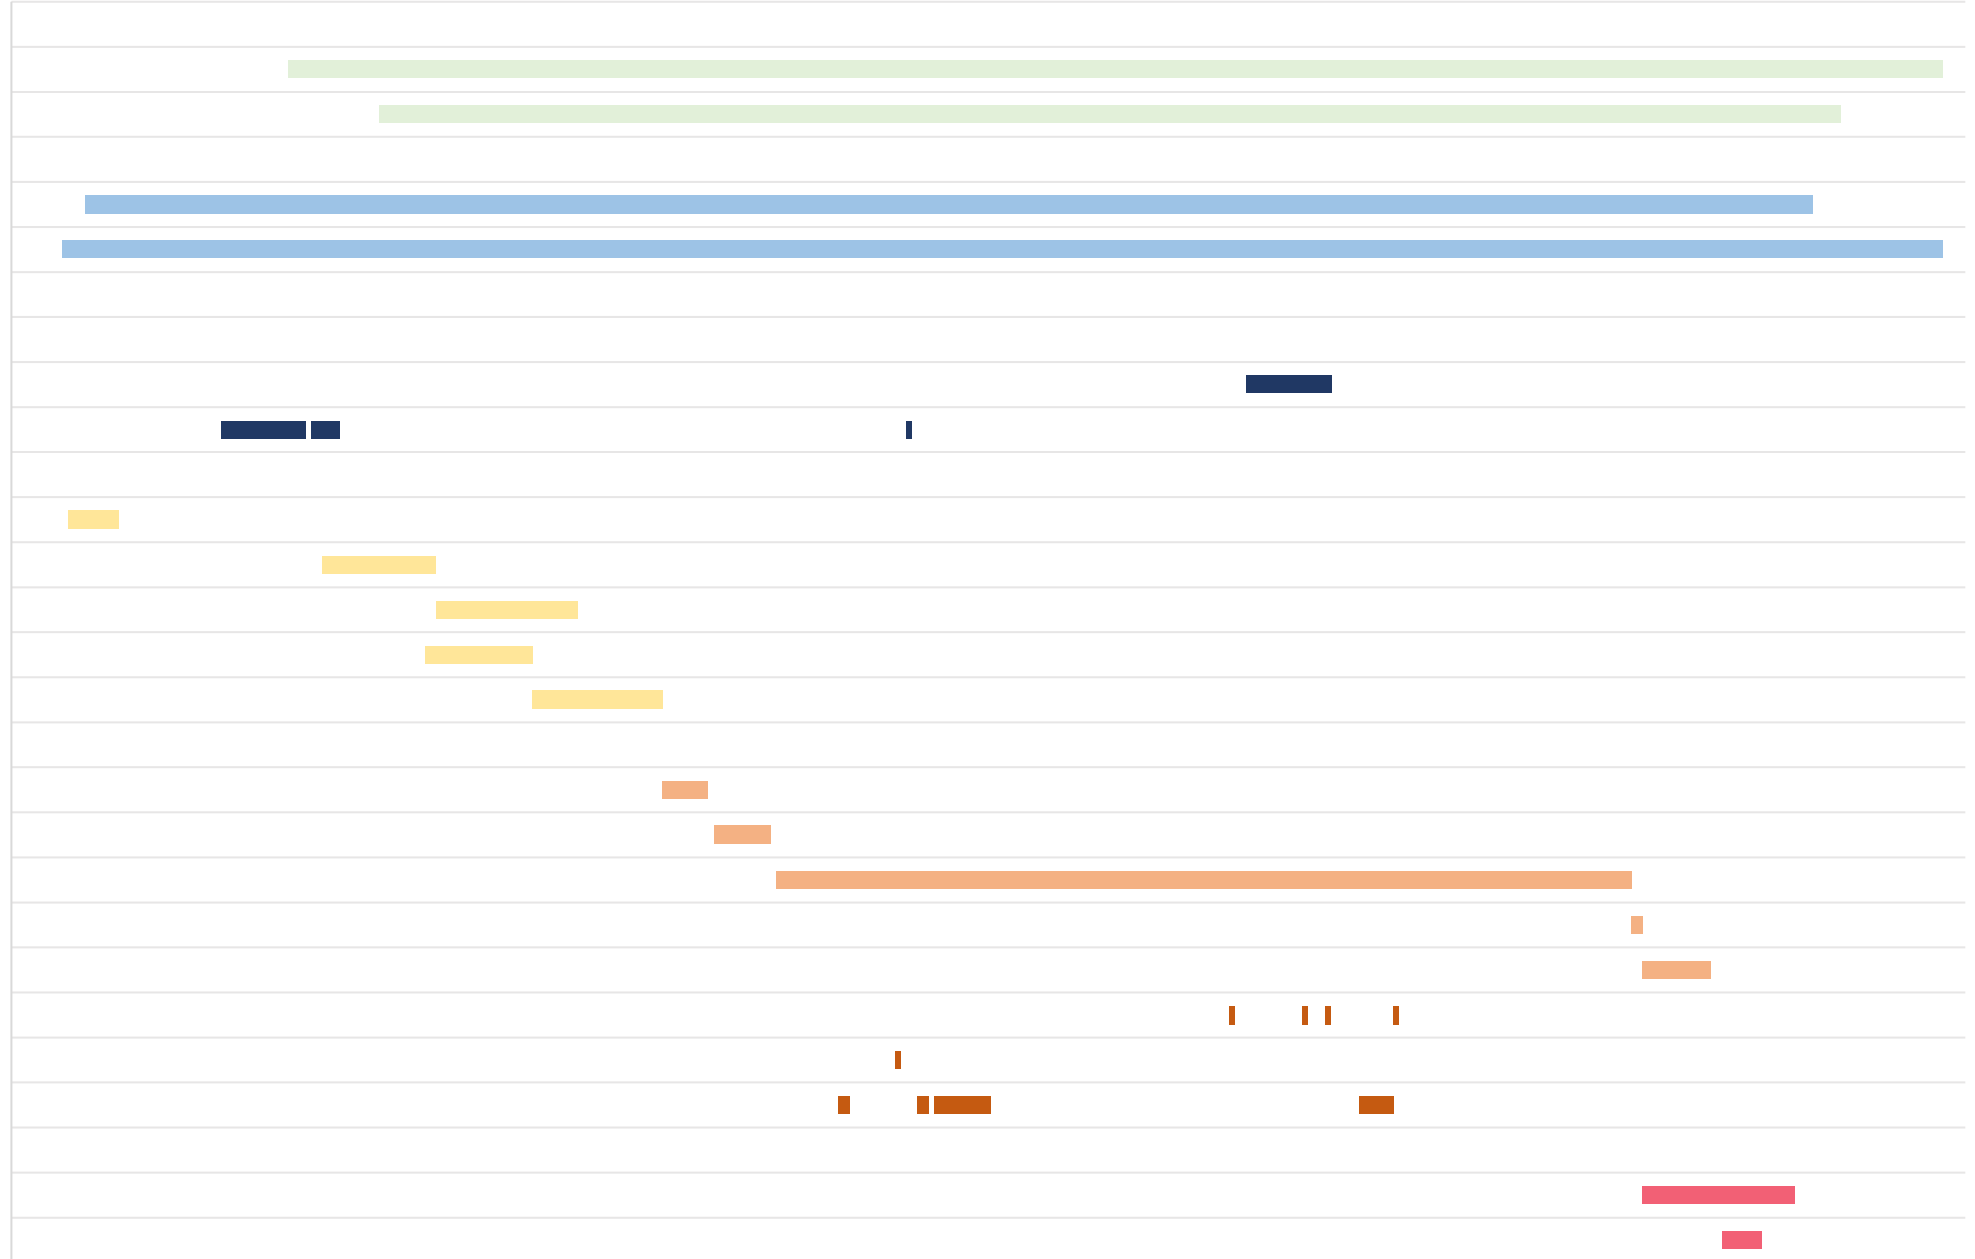

# Surgery 9

07:40

08:52

10:04

11:16

12:28

13:40

- Patient at the OR room
- Patient under anesthesia
- Scrub Nurse
- Circulating Nurse
- Supervised Circulating Nurse
- Nurses released for a break
- Nurse leaves OR room
- Starting the robotic system
- Unpacking of equipment
- Draping of the robotic arms
- Positioning of the patient
- Preparation of the surgical field
- Port Placement
- Docking
- Console Time
- Undocking
- Skin Closure
- Change of instruments
- Rinse of camera lens
- Technical Errors
- Equipment clean up
- Preparing the patient for awakening

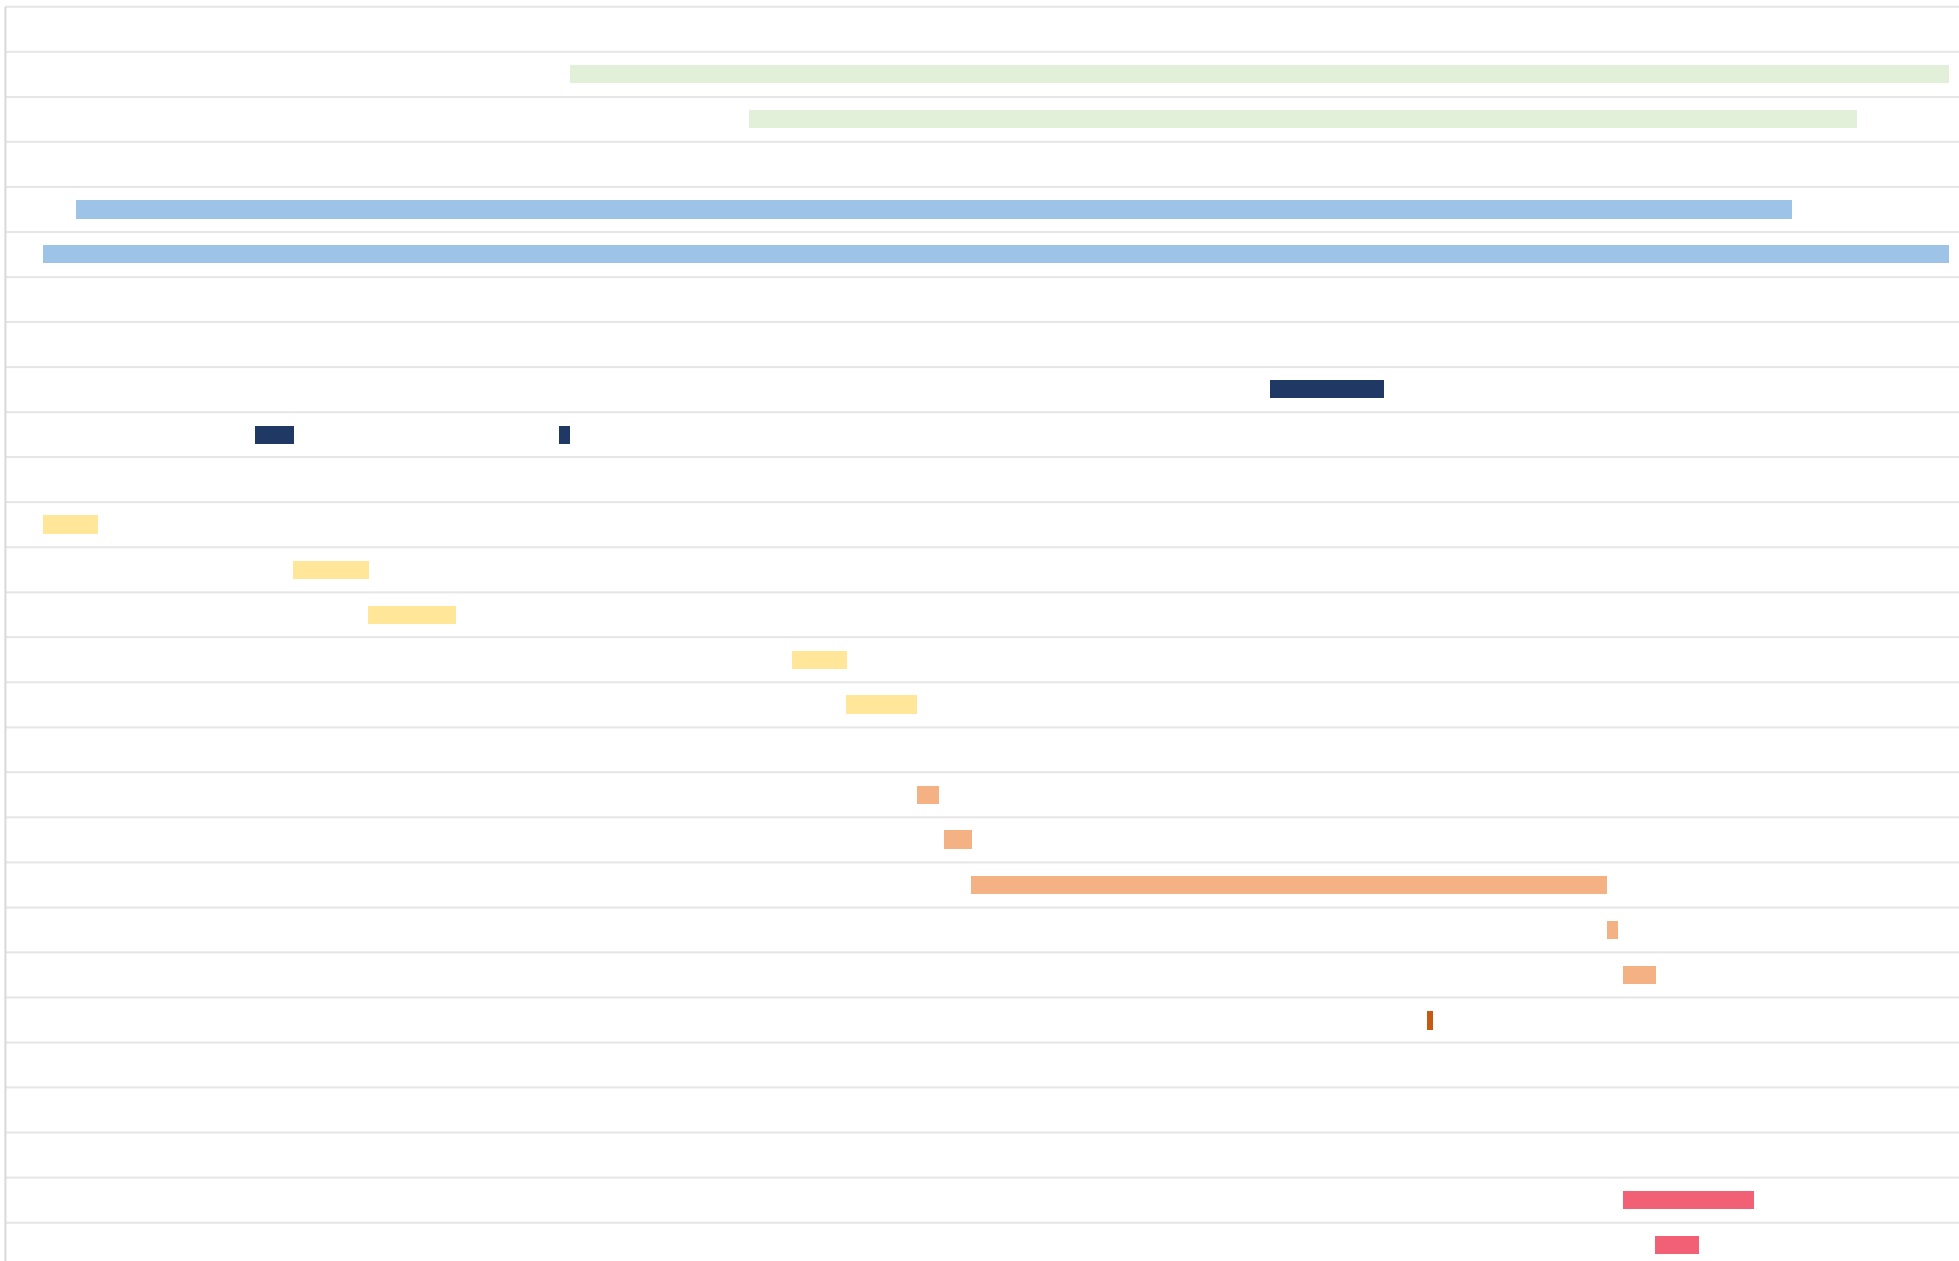

# Surgery 10

07:40

08:52

10:04

11:16

12:28

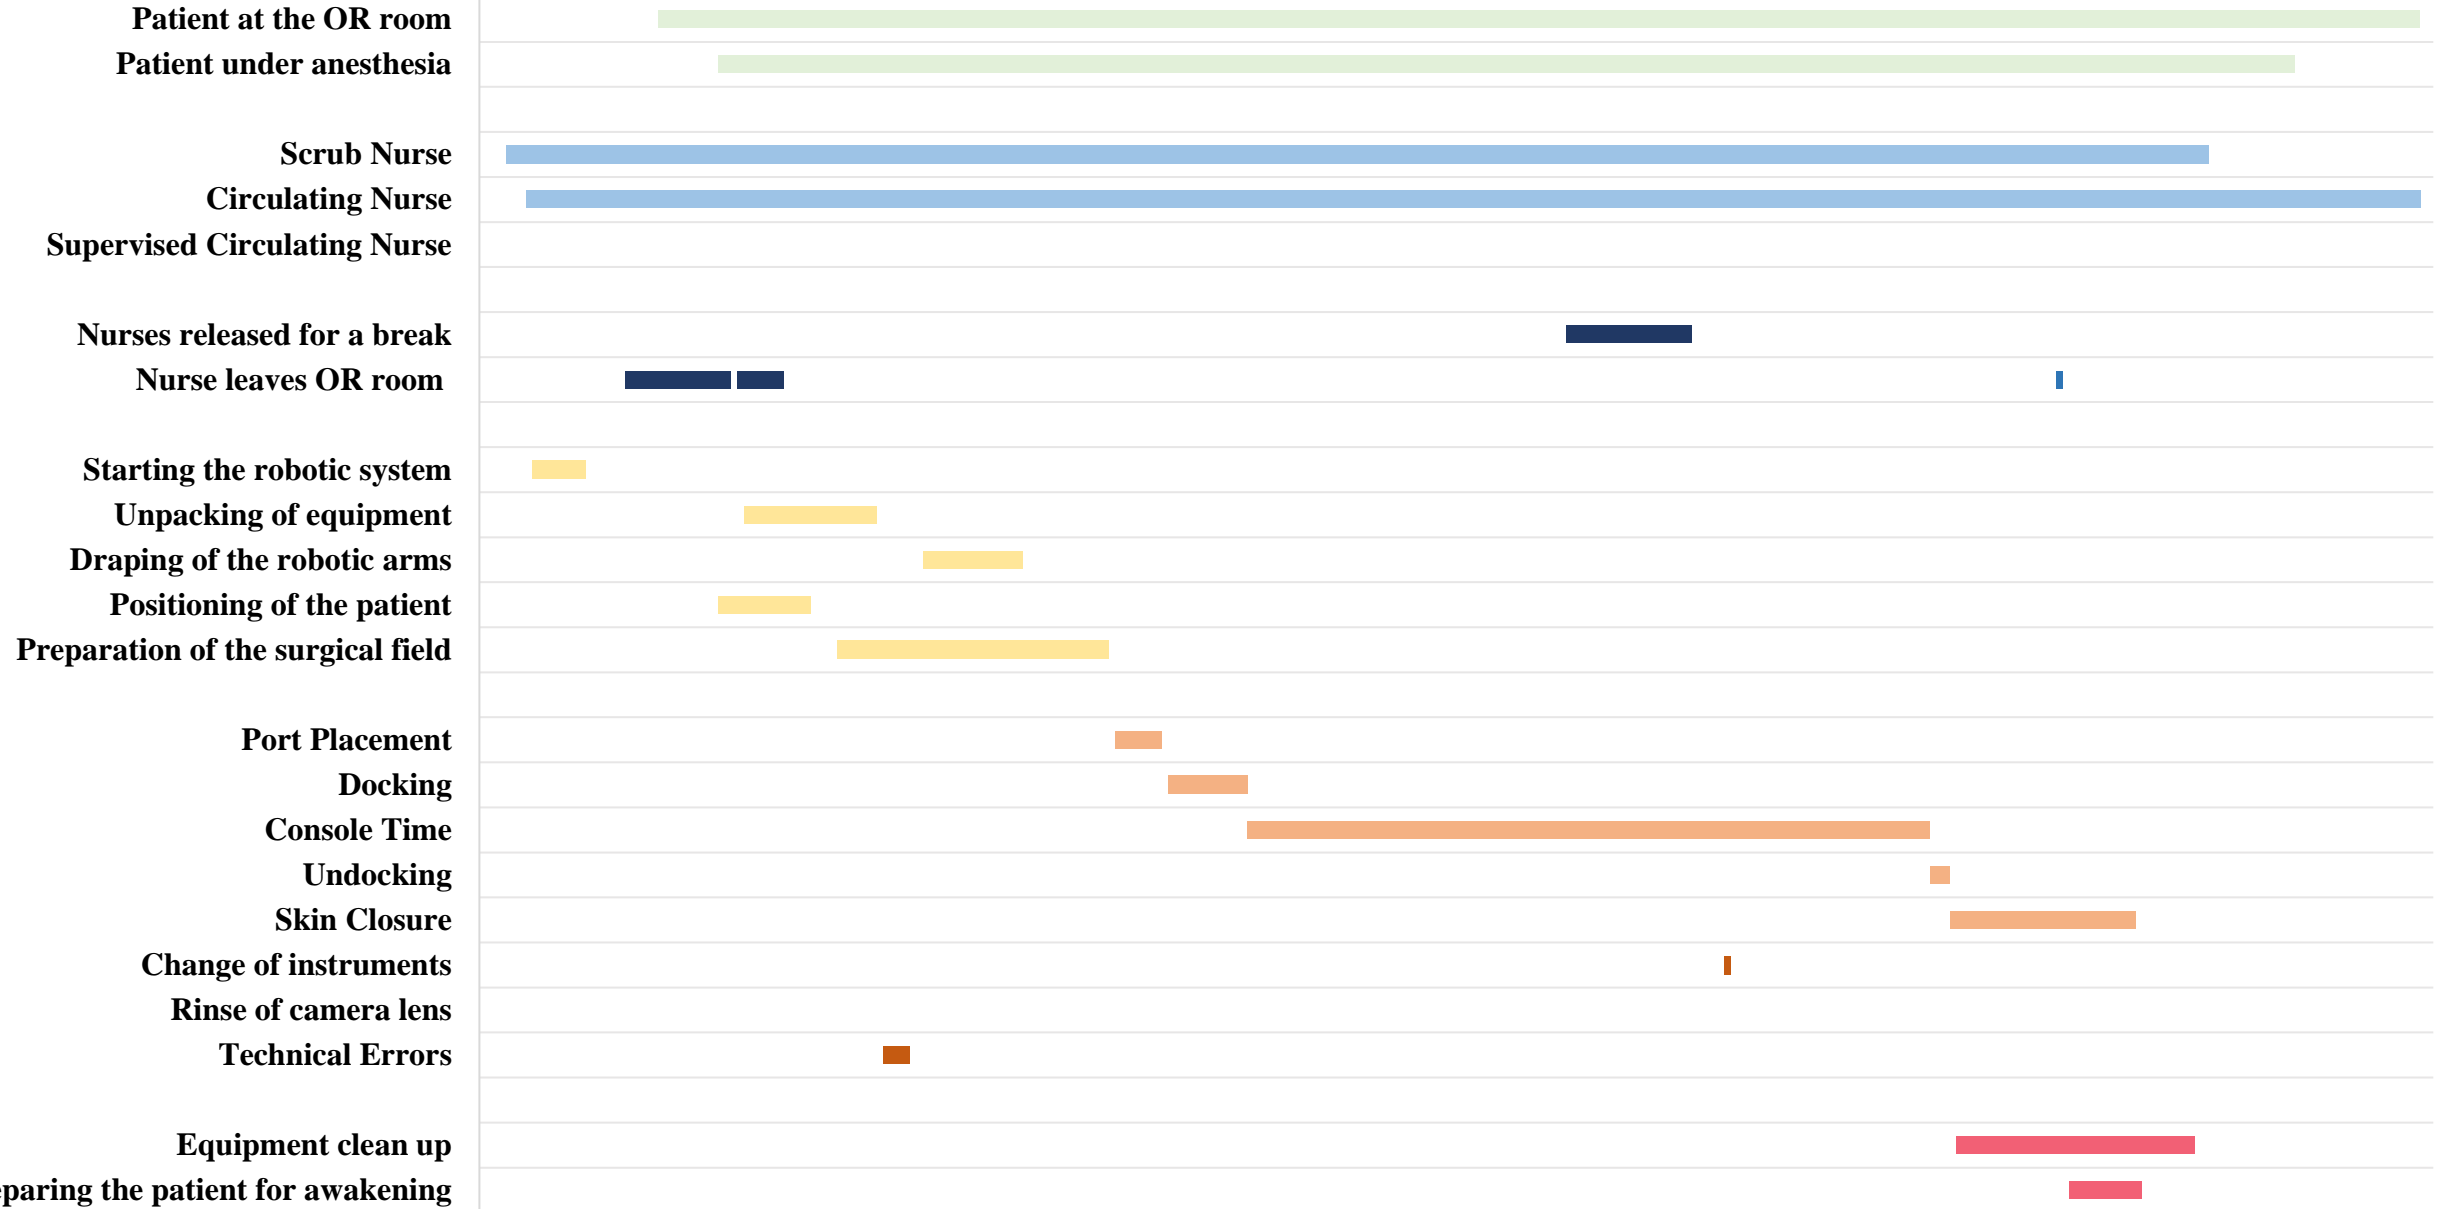

# Surgery 11

07:42

08:54

10:06

11:18

12:30

13:42

Patient at the OR room

Patient under anesthesia

Scrub Nurse

Circulating Nurse

Supervised Circulating Nurse

Nurses released for a break

Nurse leaves OR room

Starting the robotic system

Unpacking of equipment

Draping of the robotic arms

Positioning of the patient

Preparation of the surgical field

Port Placement

Docking

Console Time

Undocking

Skin Closure

Change of instruments

Rinse of camera lens

Technical Errors

Equipment clean up

Preparing the patient for awakening

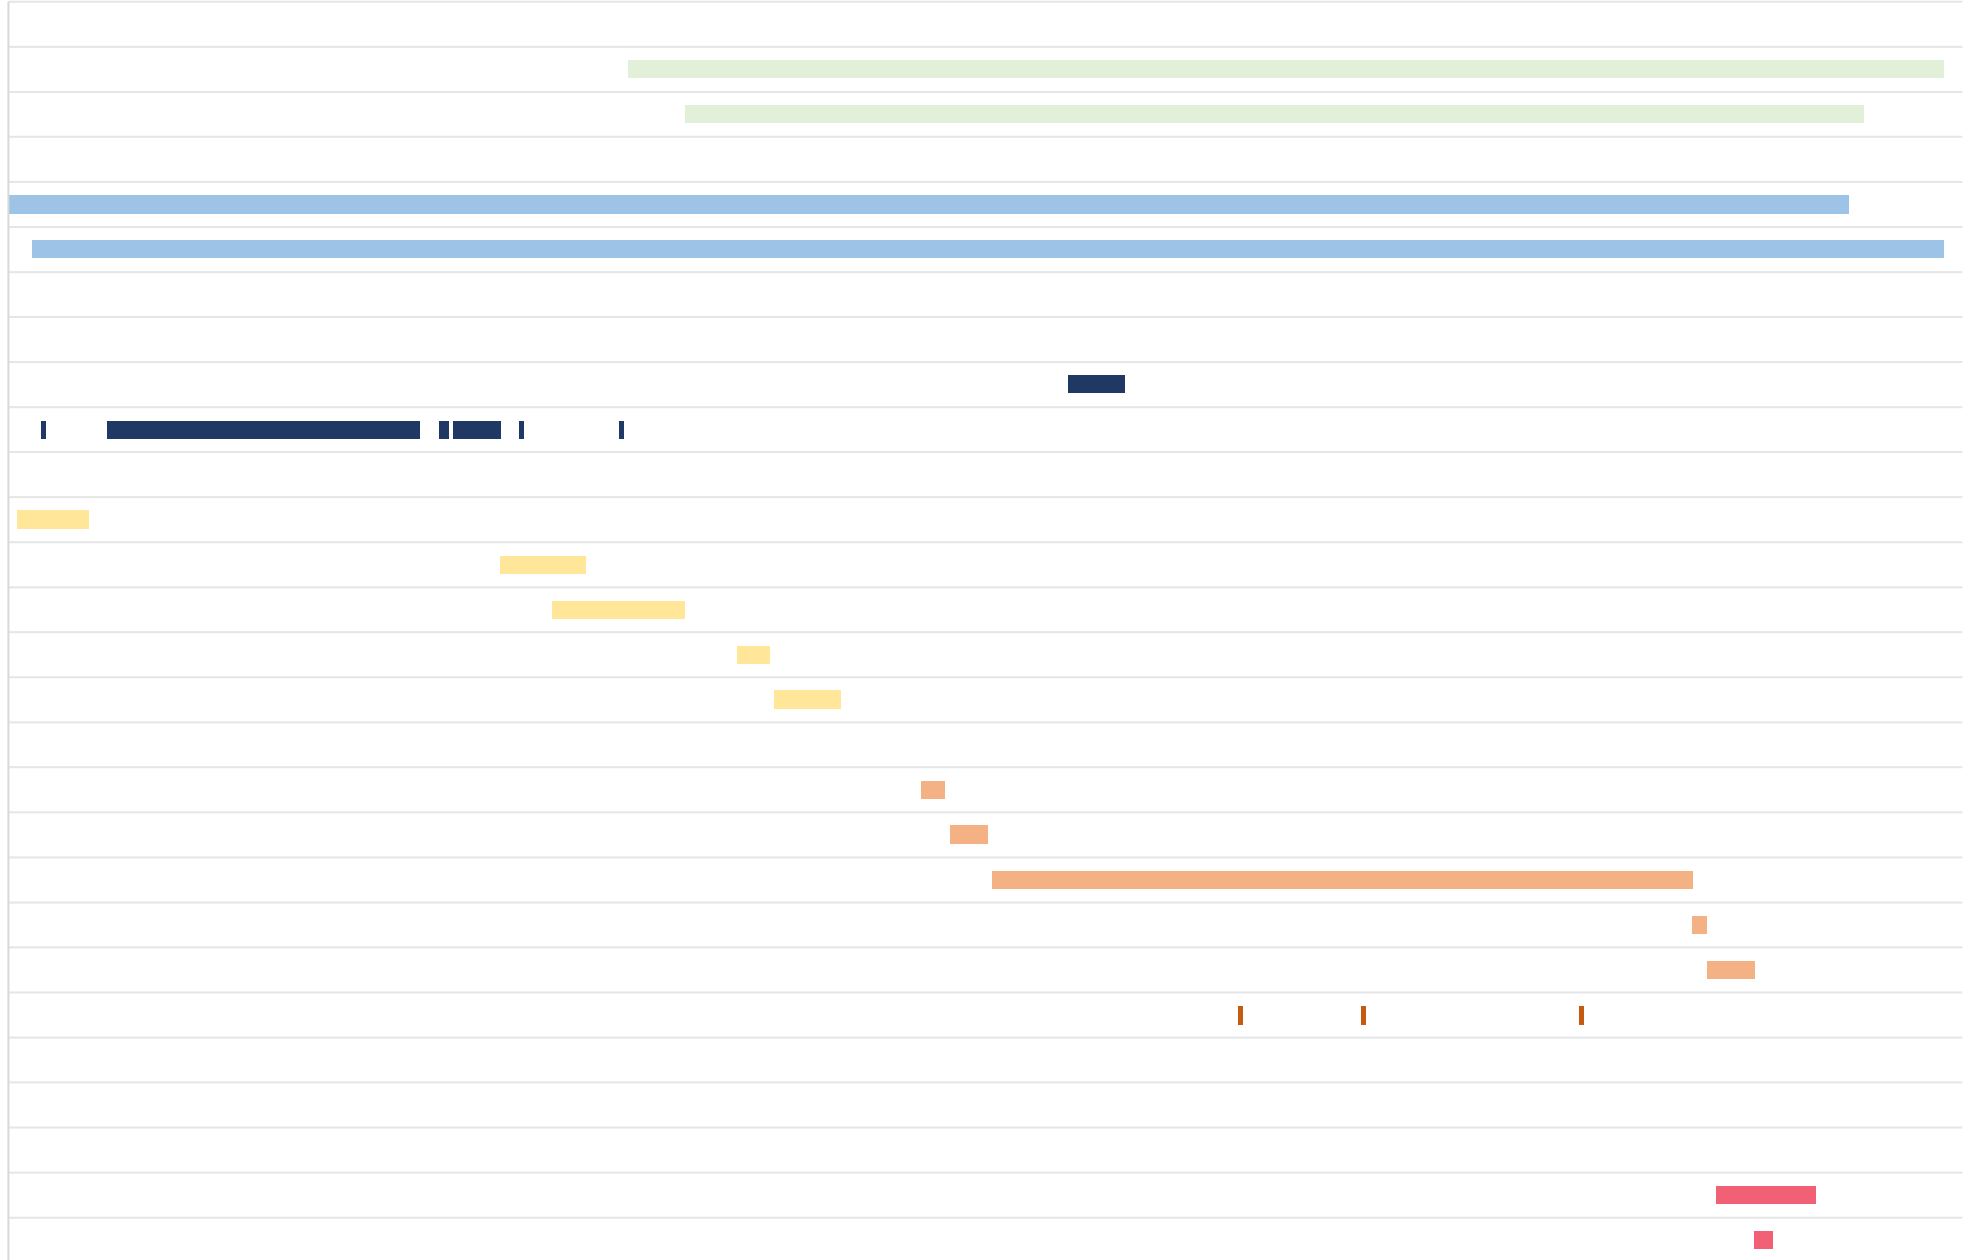

# Surgery 12

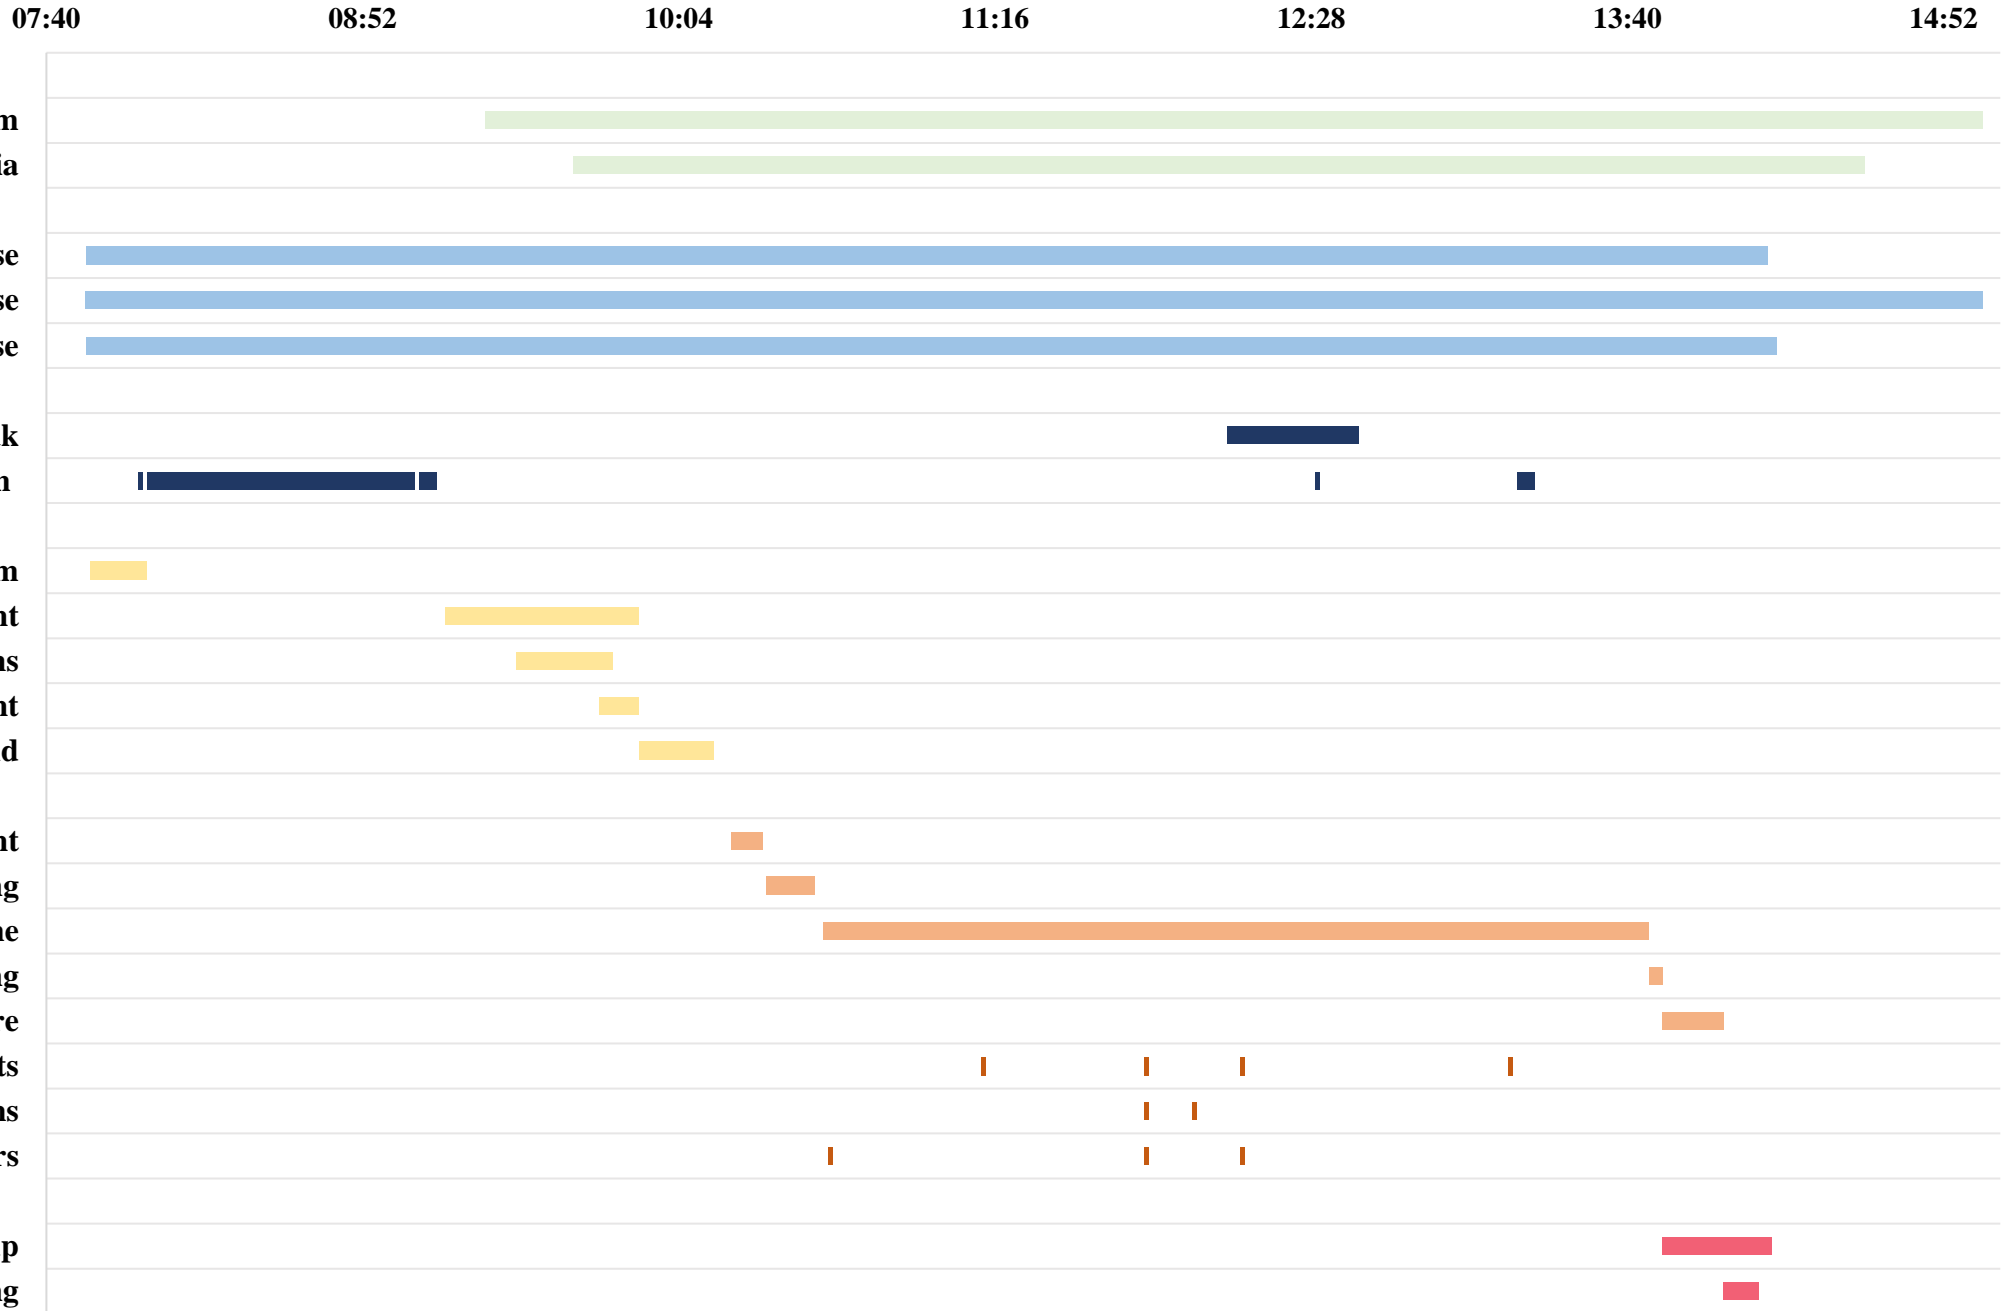

# Surgery 13

07:40

08:52

10:04

11:16

12:28

13:40

Patient at the OR room

Patient under anesthesia

Scrub Nurse

Circulating Nurse

Supervised Circulating Nurse

Nurses released for a break

Nurse leaves OR room

Starting the robotic system

Unpacking of equipment

Draping of the robotic arms

Positioning of the patient

Preparation of the surgical field

Port Placement

Docking

Console Time

Undocking

Skin Closure

Change of instruments

Rinse of camera lens

Technical Errors

Equipment clean up

Preparing the patient for awakening

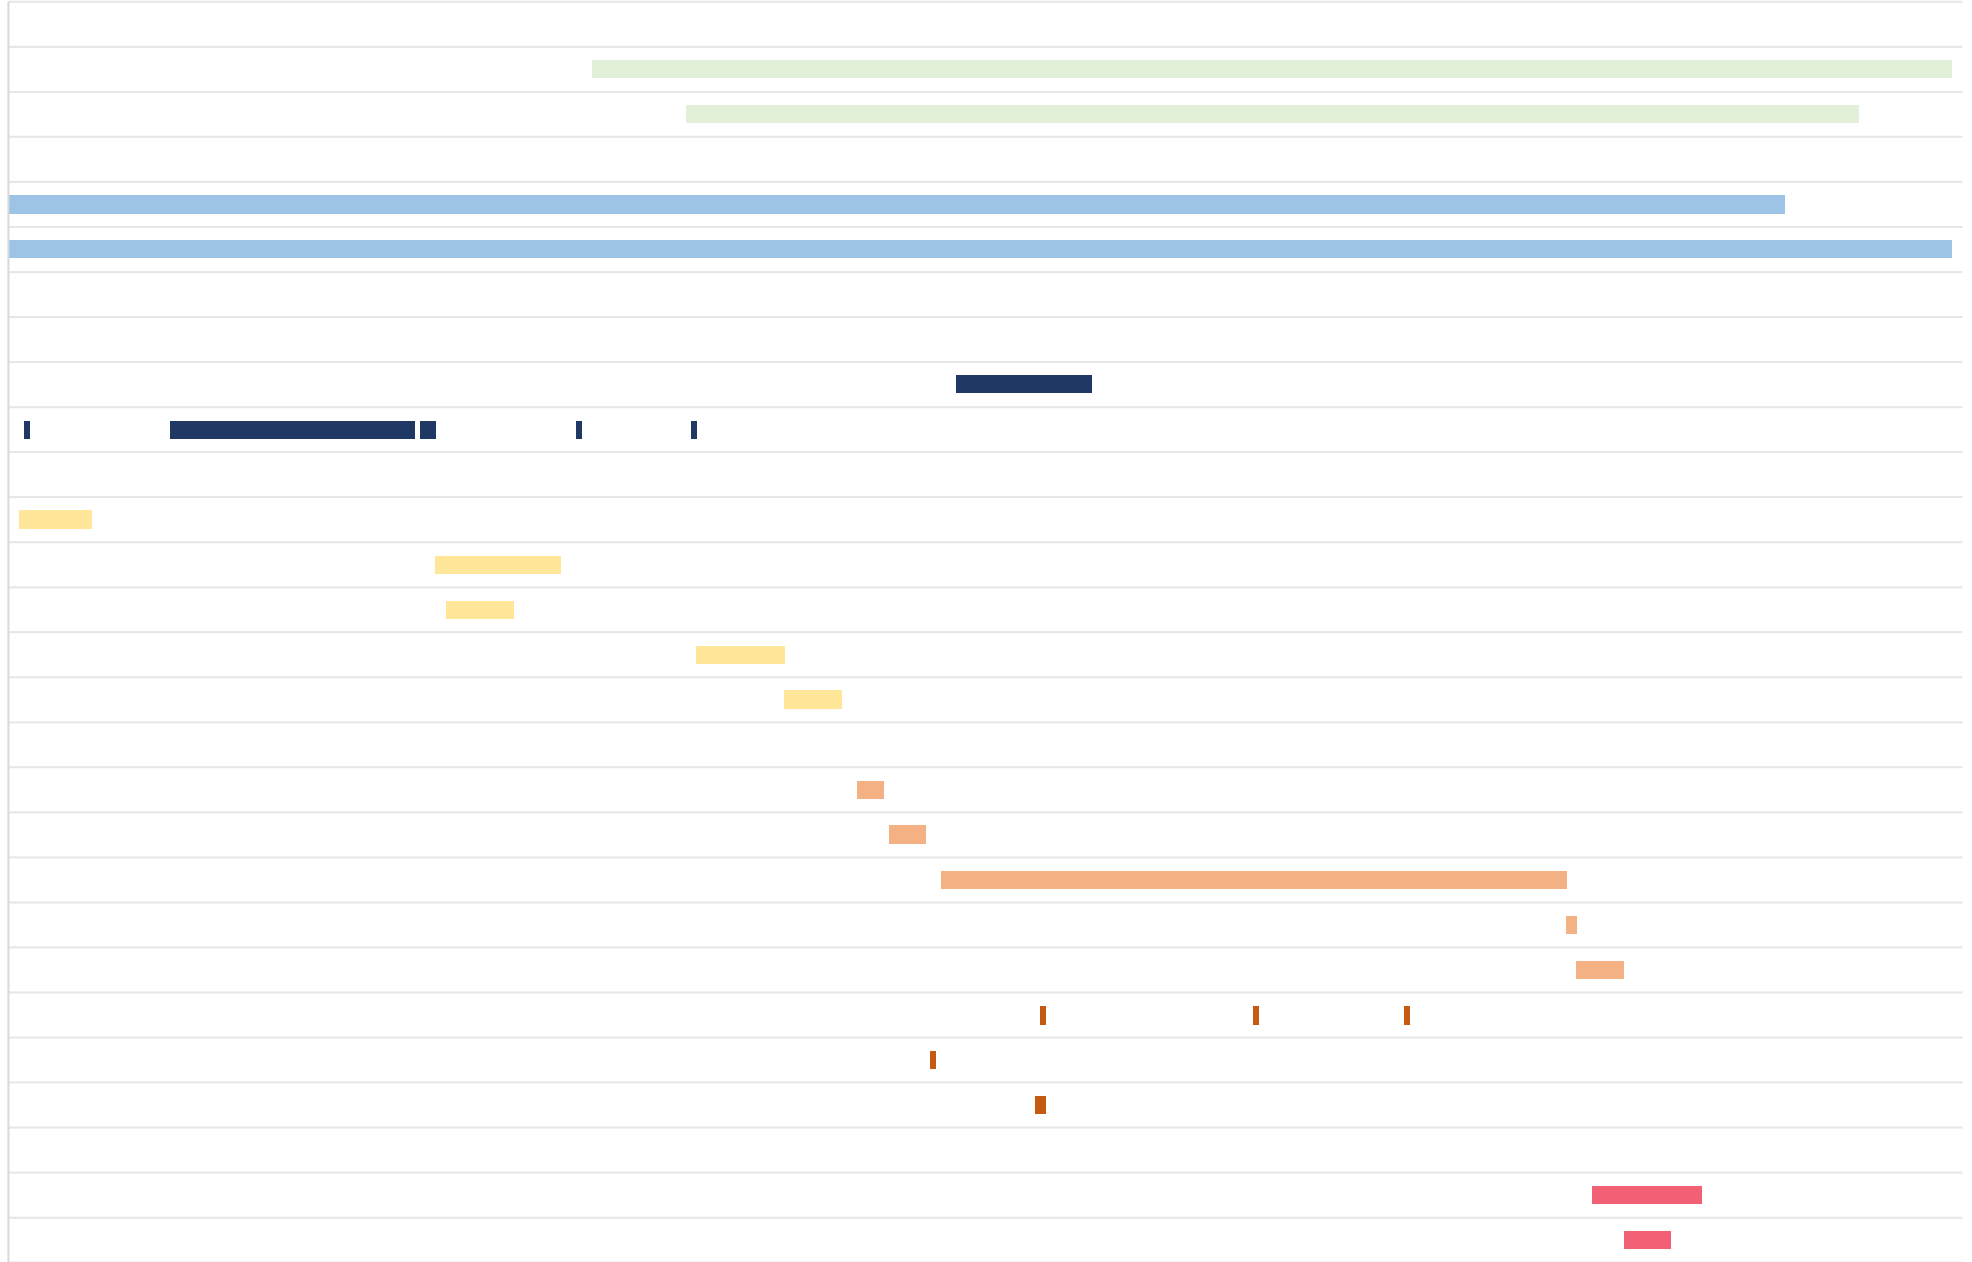

# Surgery 14

07:40

08:52

10:04

11:16

12:28

Patient at the OR room

Patient under anesthesia

Scrub Nurse

Circulating Nurse

Supervised Circulating Nurse

Nurses released for a break

Nurse leaves OR room

Starting the robotic system

Unpacking of equipment

Draping of the robotic arms

Positioning of the patient

Preparation of the surgical field

Port Placement

Docking

Console Time

Undocking

Skin Closure

Change of instruments

Rinse of camera lens

Technical Errors

Equipment clean up

Preparing the patient for awakening

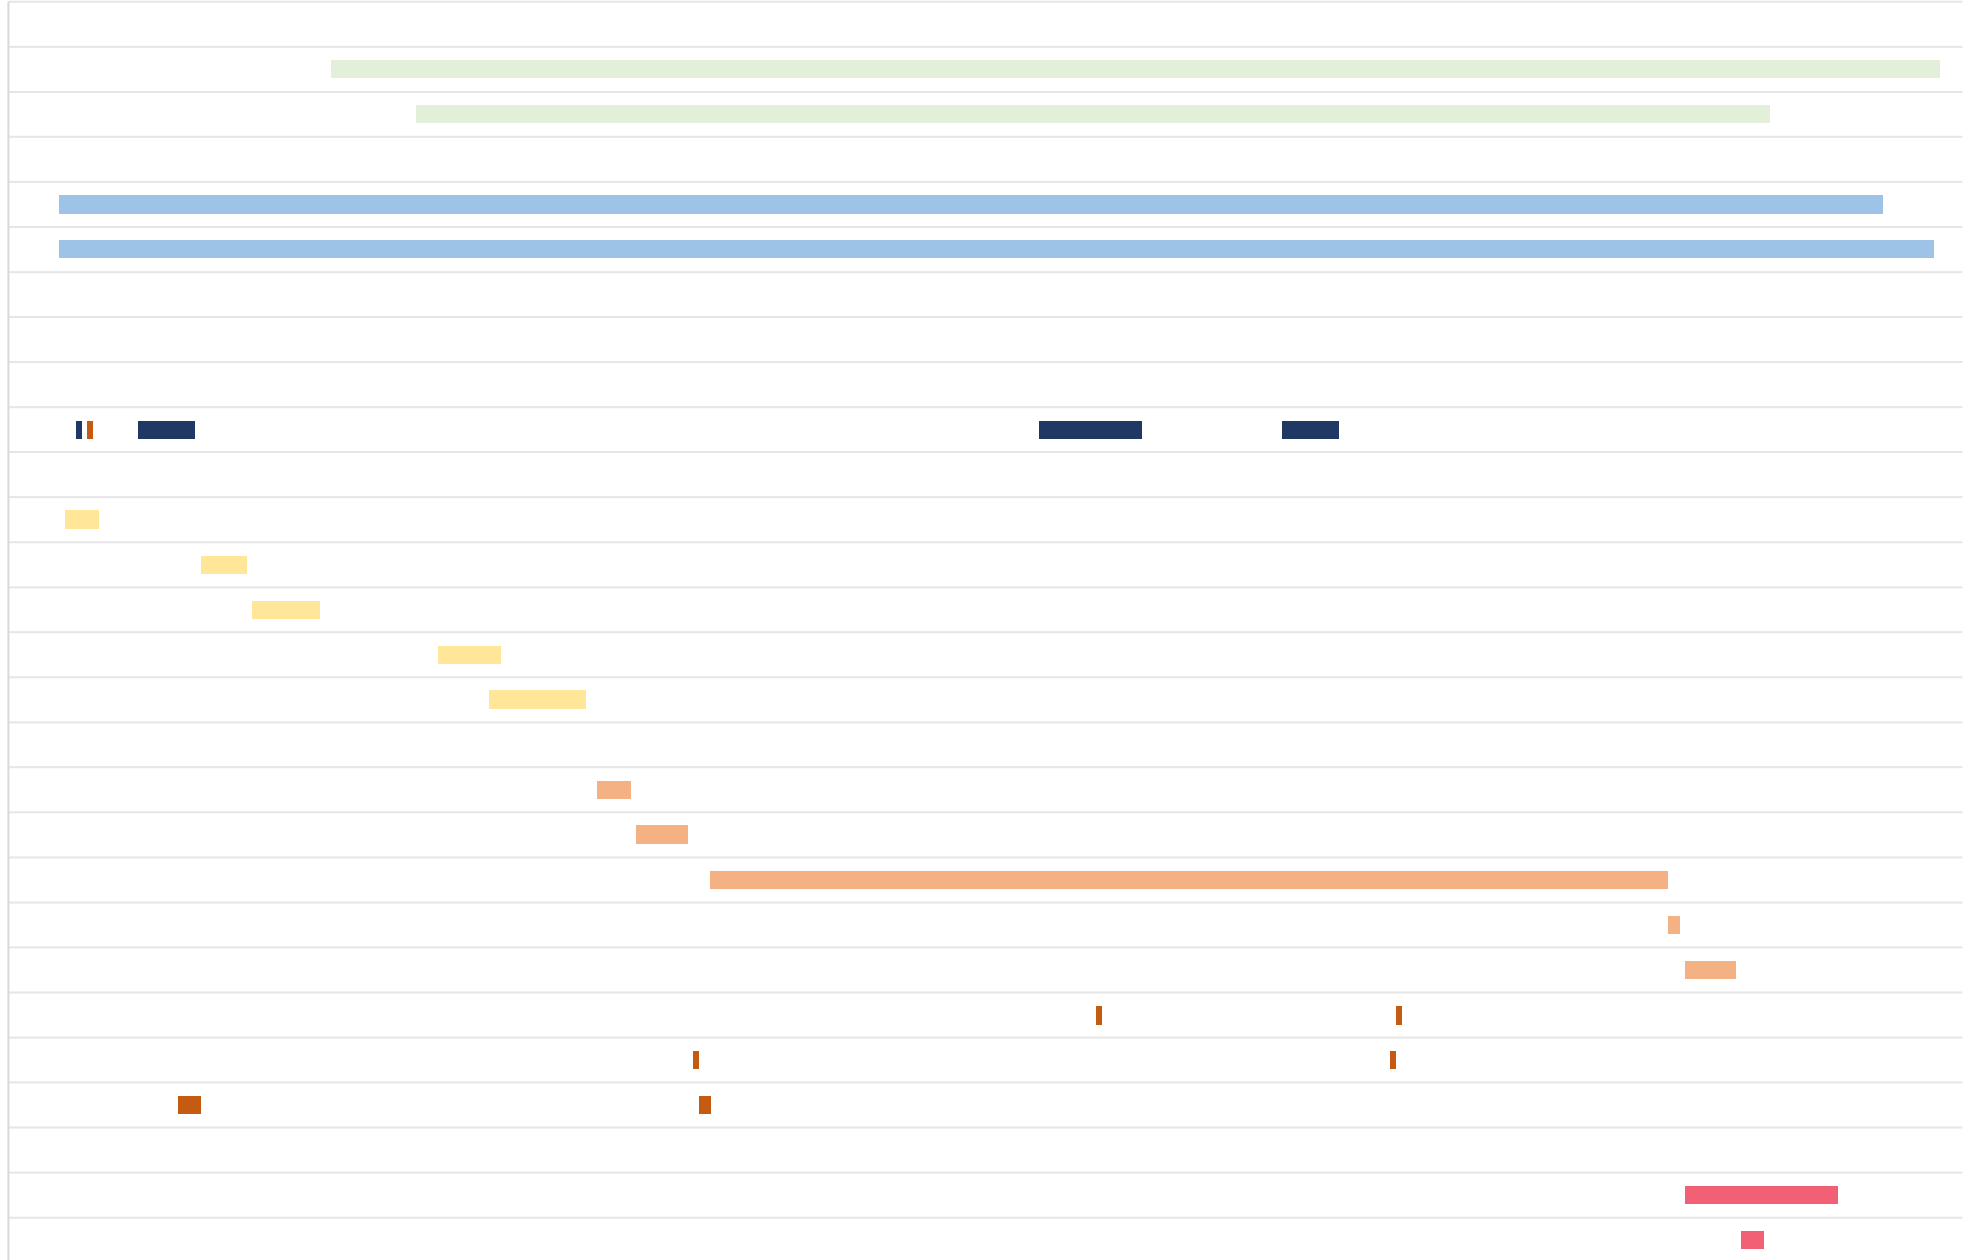

# Surgery 15

07:40

08:52

10:04

11:16

- Patient at the OR room
- Patient under anesthesia
- Scrub Nurse
- Circulating Nurse
- Supervised Circulating Nurse
- Nurses released for a break
- Nurse leaves OR room
- Starting the robotic system
- Unpacking of equipment
- Draping of the robotic arms
- Positioning of the patient
- Preparation of the surgical field
- Port Placement
- Docking
- Console Time
- Undocking
- Skin Closure
- Change of instruments
- Rinse of camera lens
- Technical Errors
- Equipment clean up
- Preparing the patient for awakening

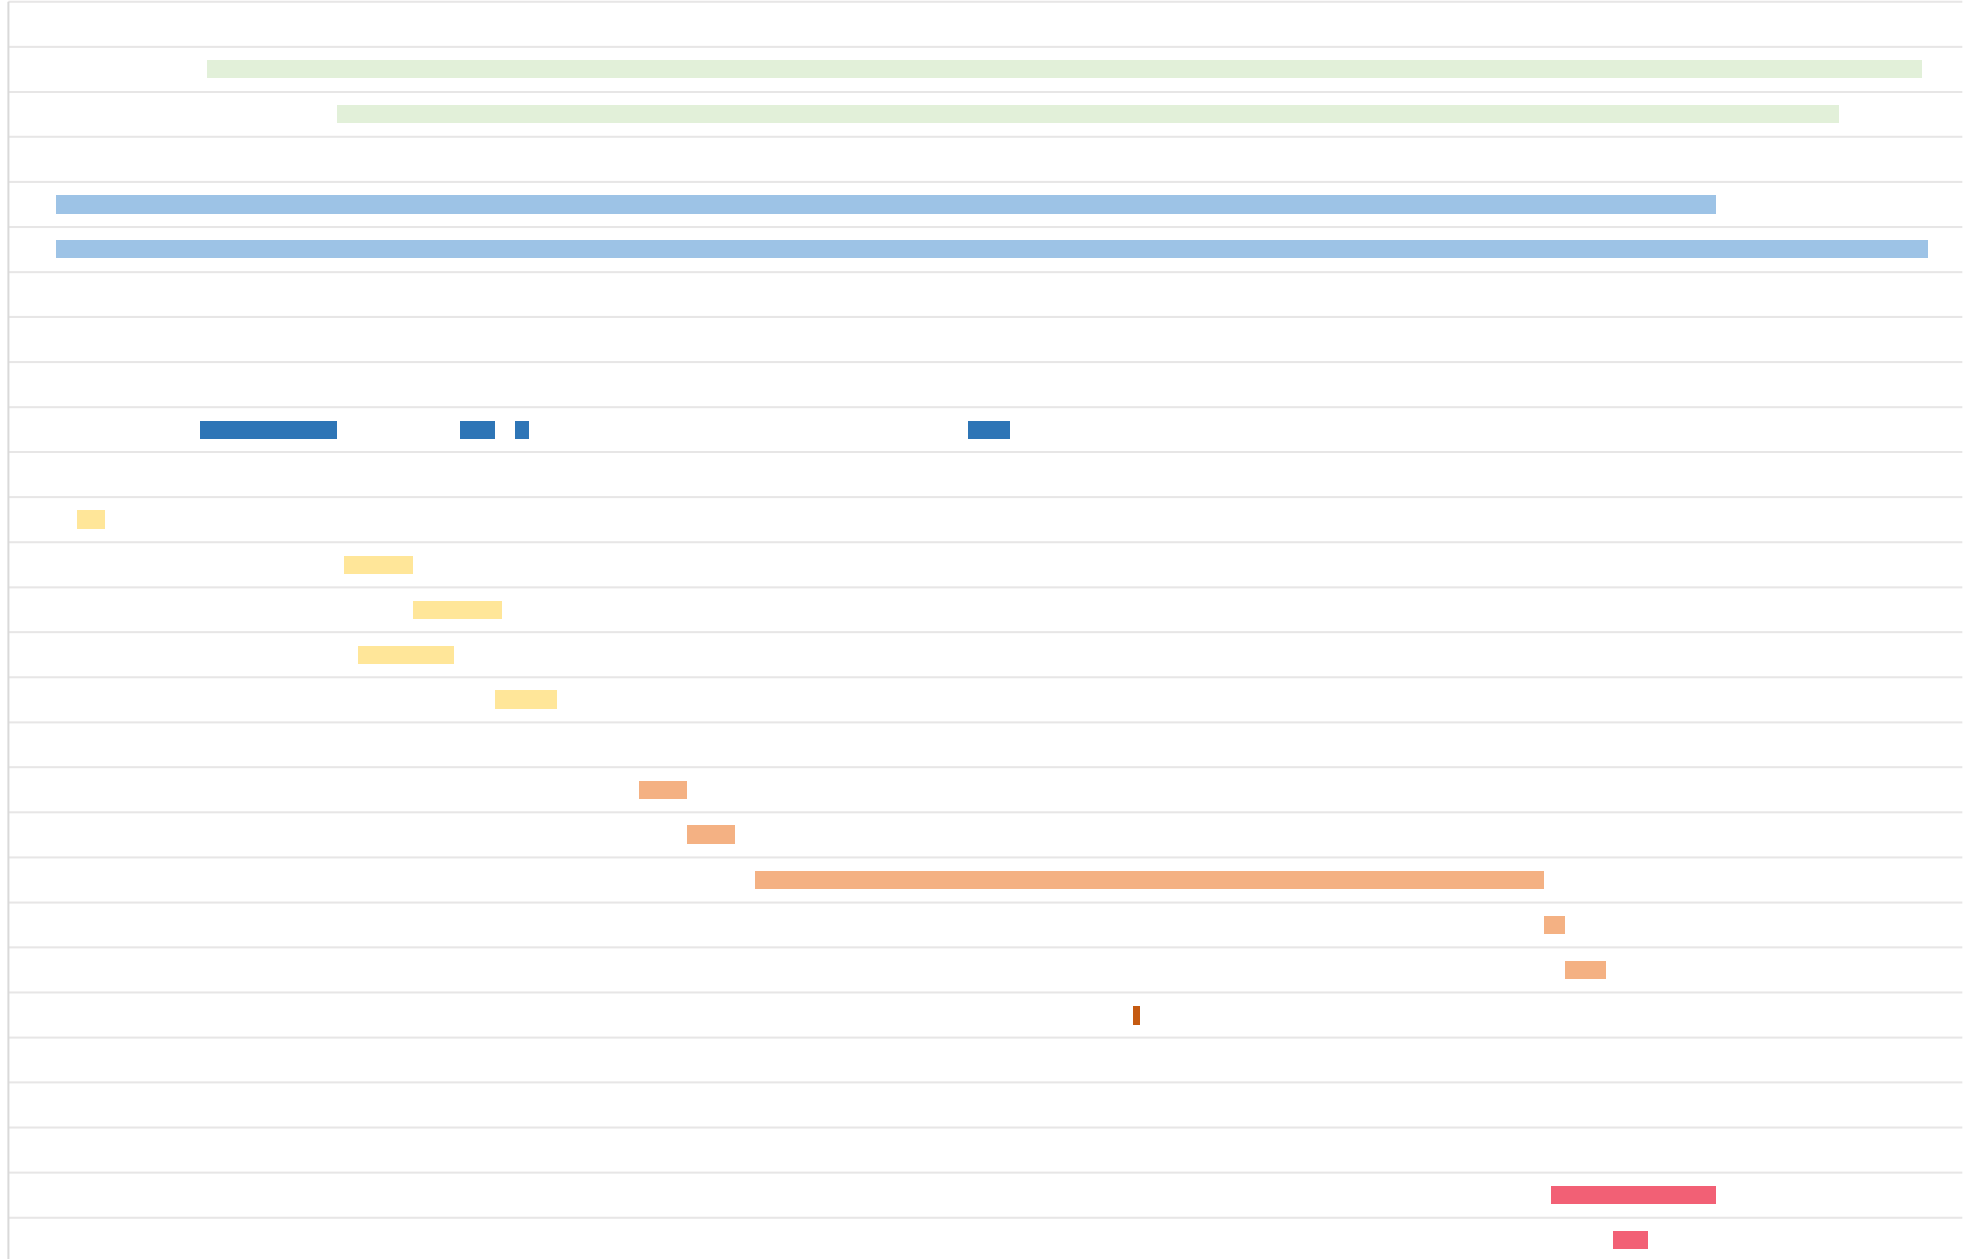



# Surgery 16

07:40

08:52

10:04

11:16

12:28

Patient at the OR room

Patient under anesthesia

Scrub Nurse

Circulating Nurse

Supervised Circulating Nurse

Nurses released for a break

Nurse leaves OR room

Starting the robotic system

Unpacking of equipment

Draping of the robotic arms

Positioning of the patient

Preparation of the surgical field

Port Placement

Docking

Console Time

Undocking

Skin Closure

Change of instruments

Rinse of camera lens

Technical Errors

Equipment clean up

Preparing the patient for awakening

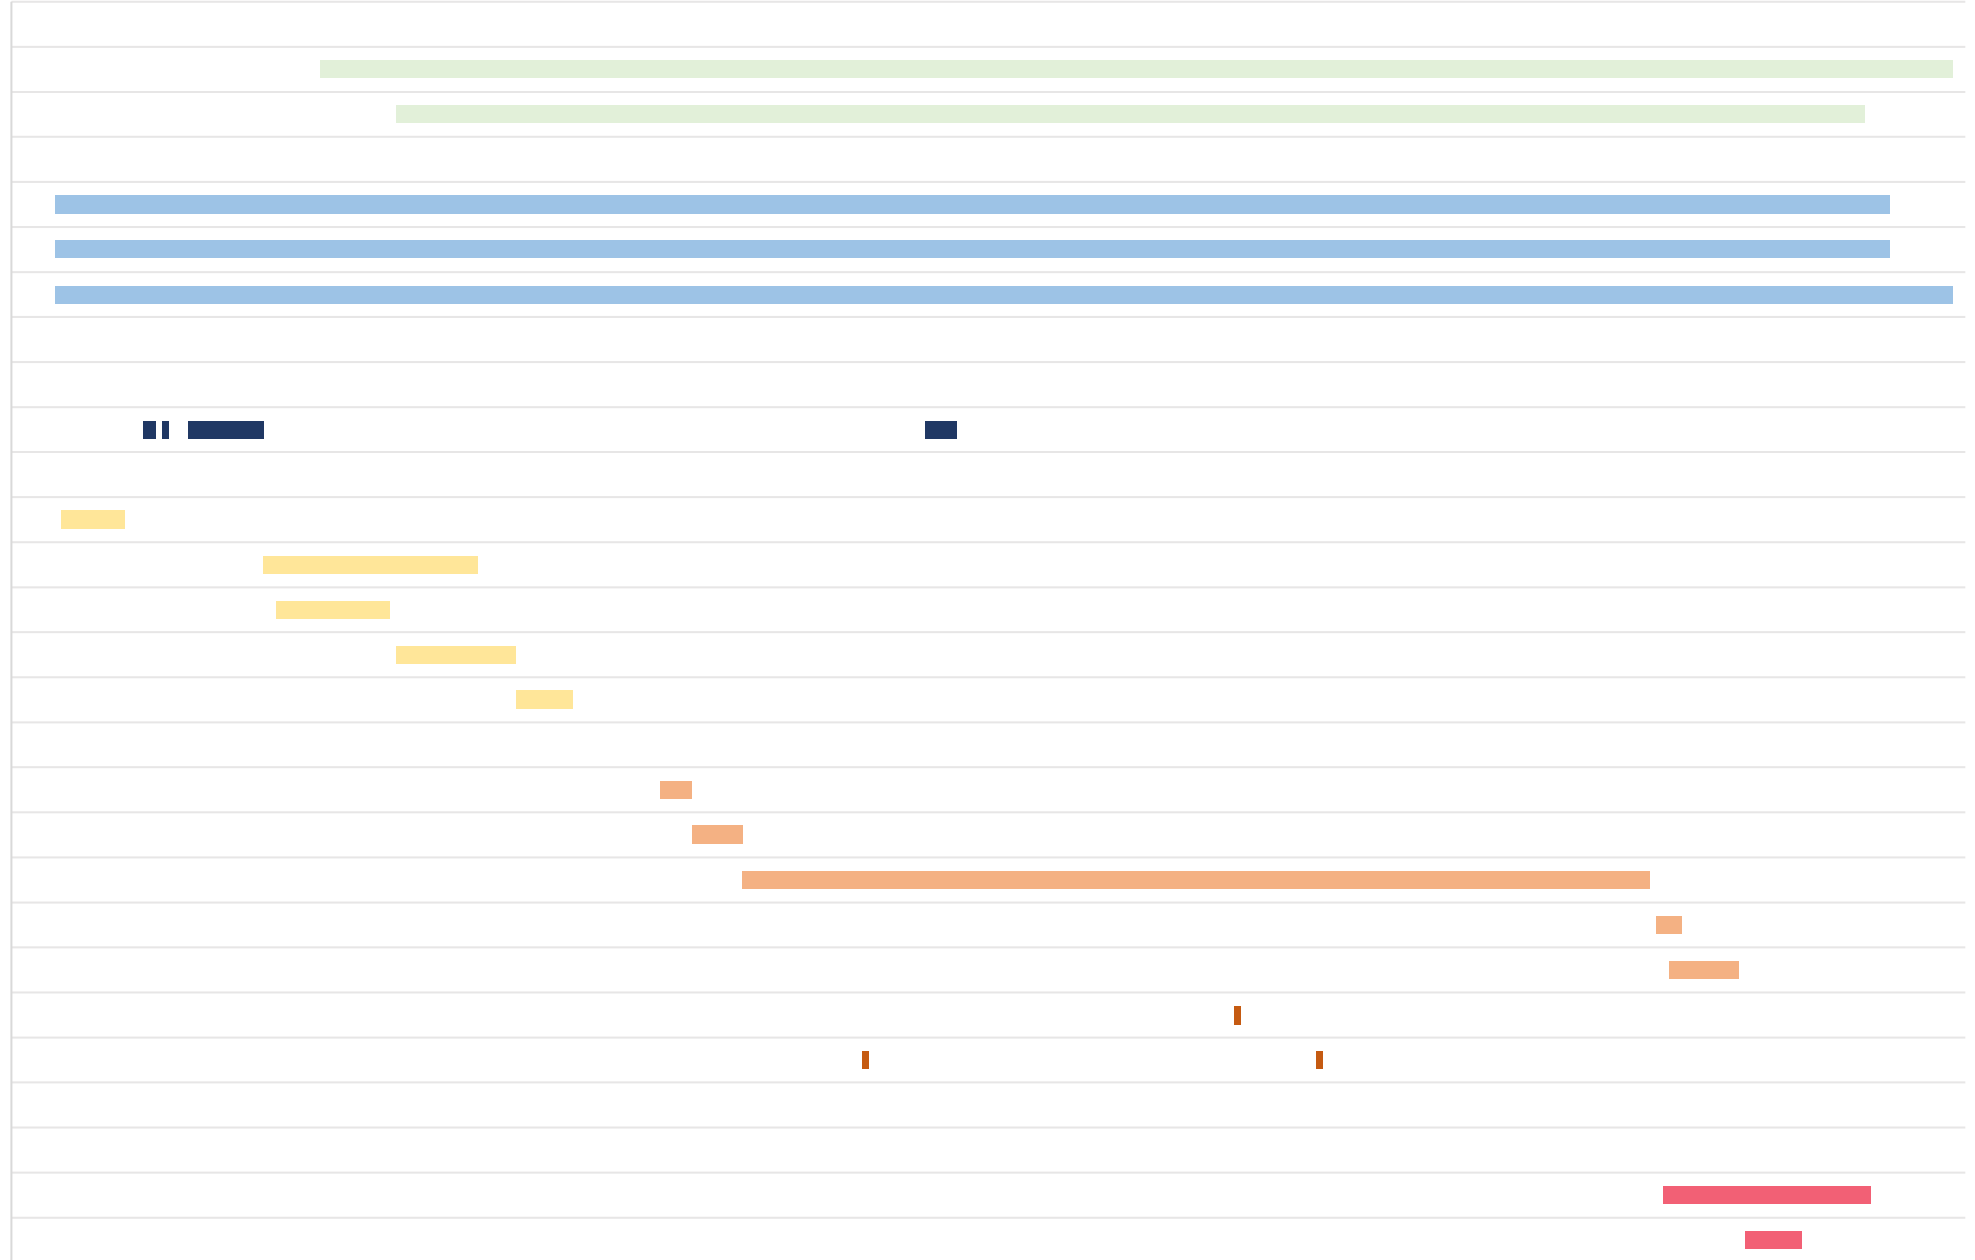

# Surgery 17

07:35

08:47

09:59

11:11

12:23

13:35

Patient at the OR room

Patient under anesthesia

Scrub Nurse

Circulating Nurse

Supervised Circulating Nurse

Nurses released for a break

Nurse leaves OR room

Starting the robotic system

Unpacking of equipment

Draping of the robotic arms

Positioning of the patient

Preparation of the surgical field

Port Placement

Docking

Console Time

Undocking

Skin Closure

Change of instruments

Rinse of camera lens

Technical Errors

Equipment clean up

Preparing the patient for awakening

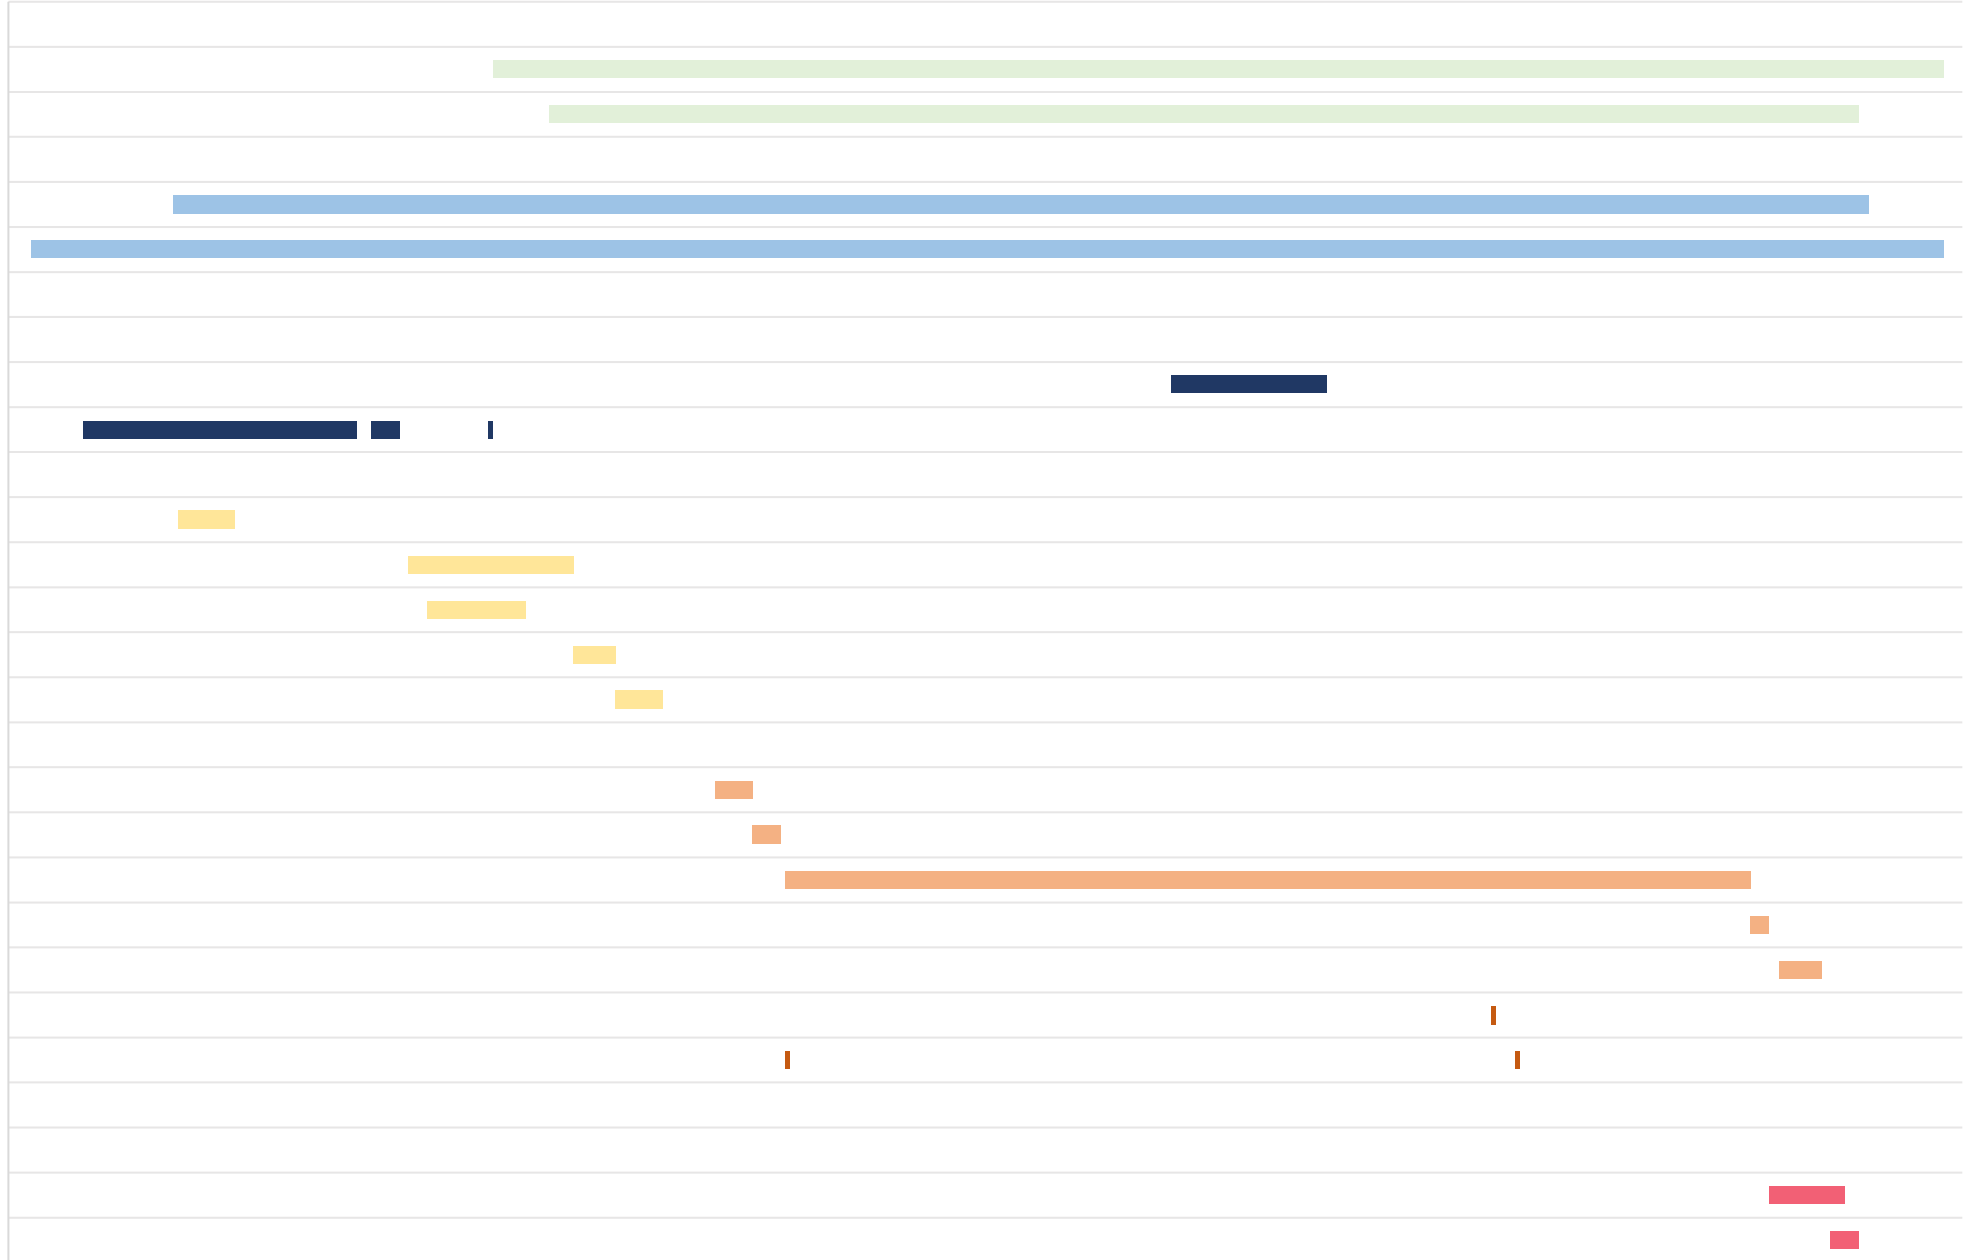

# Surgery 18

07:40

08:52

10:04

11:16

12:28

13:40

Patient at the OR room

Patient under anesthesia

Scrub Nurse

Circulating Nurse

Supervised Circulating Nurse

Nurses released for a break

Nurse leaves OR room

Starting the robotic system

Unpacking of equipment

Draping of the robotic arms

Positioning of the patient

Preparation of the surgical field

Port Placement

Docking

Console Time

Undocking

Skin Closure

Change of instruments

Rinse of camera lens

Technical Errors

Equipment clean up

Preparing the patient for awakening

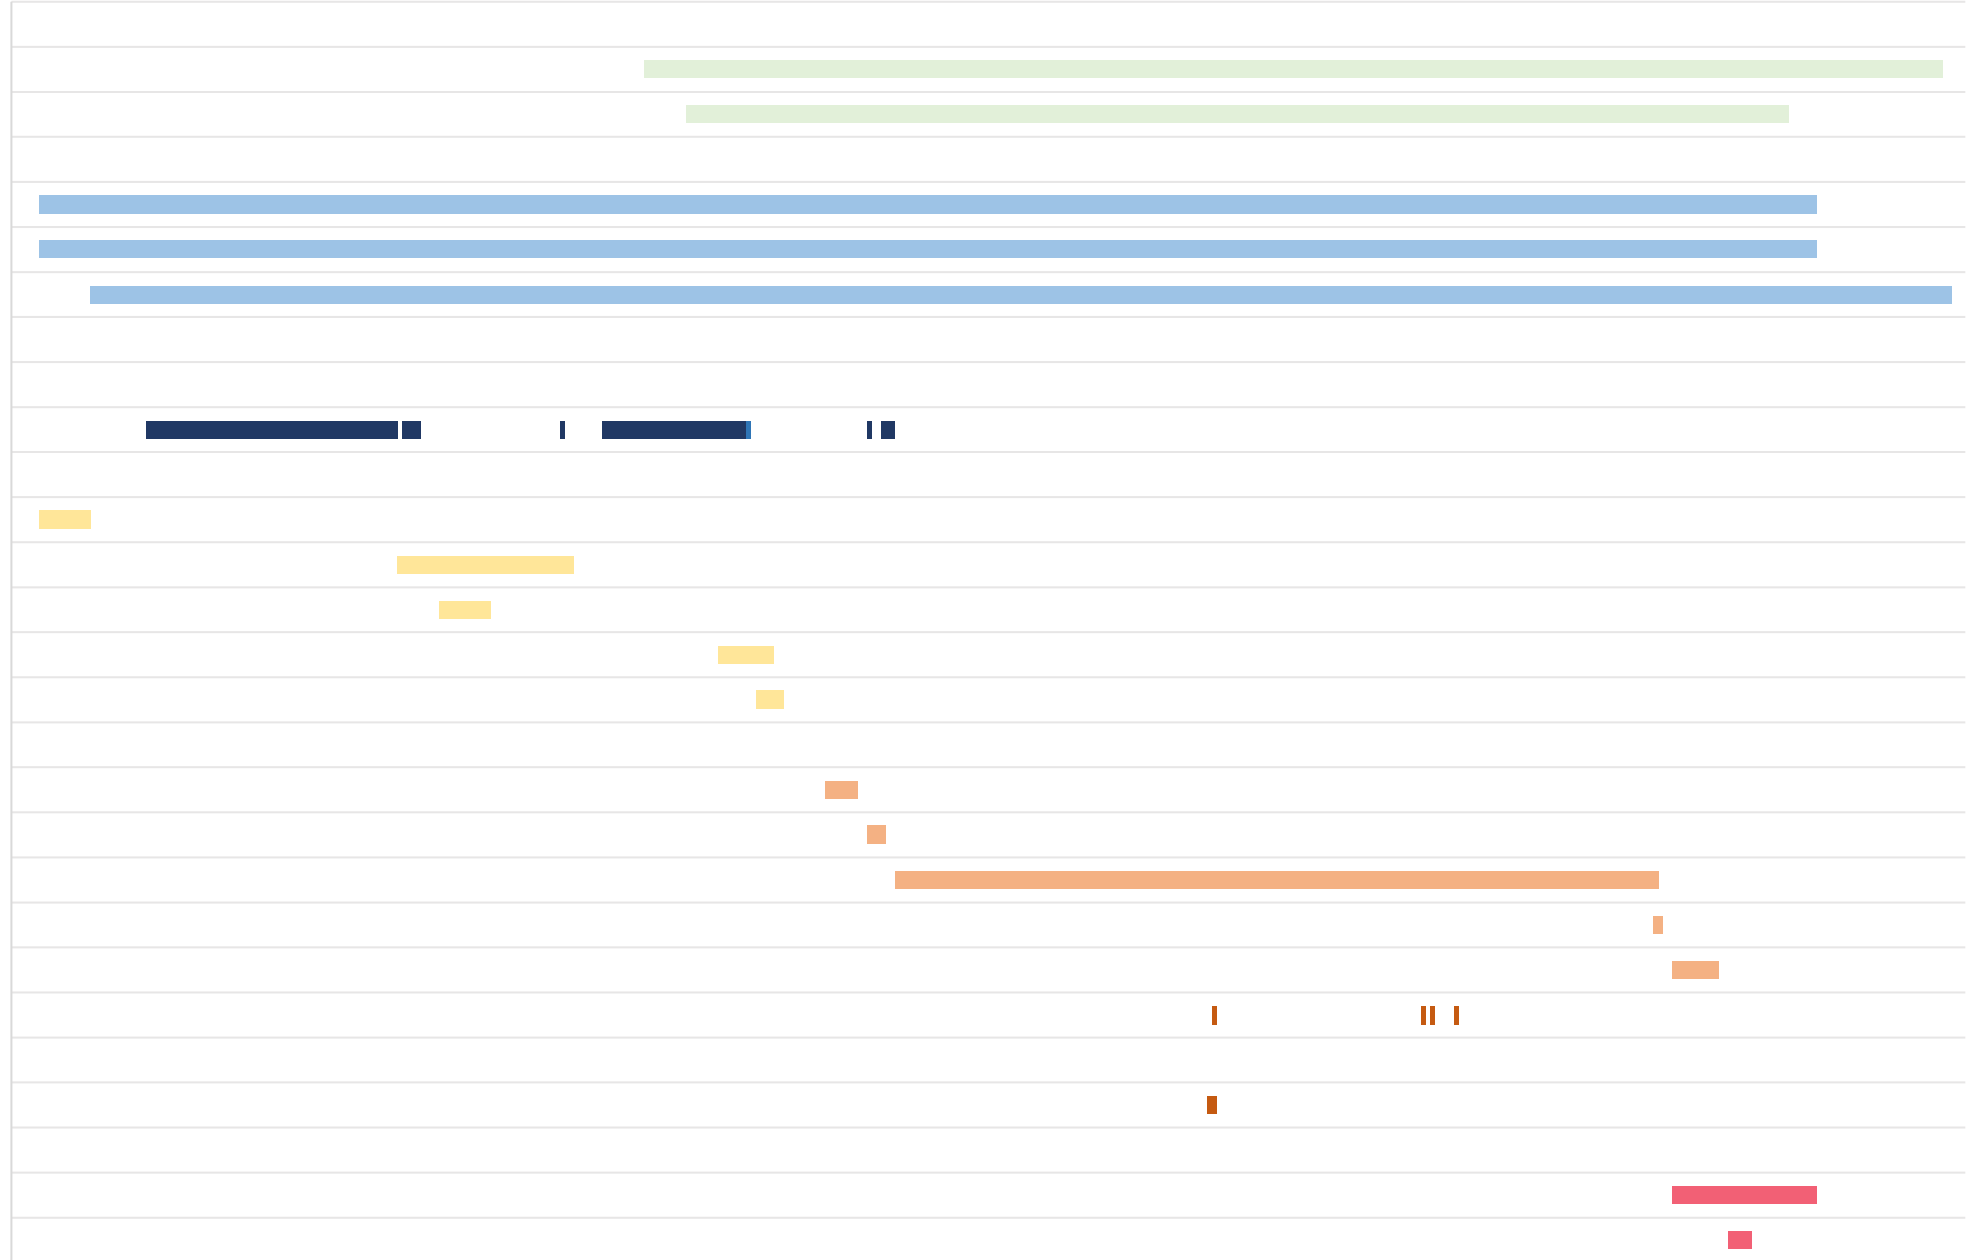

# Surgery 19

07:40

08:52

10:04

11:16

12:28

13:40

Patient at the OR room

Patient under anesthesia

Scrub Nurse

Circulating Nurse

Supervised Circulating Nurse

Nurses released for a break

Nurse leaves OR room

Starting the robotic system

Unpacking of equipment

Draping of the robotic arms

Positioning of the patient

Preparation of the surgical field

Port Placement

Docking

Console Time

Undocking

Skin Closure

Change of instruments

Rinse of camera lens

Technical Errors

Equipment clean up

Preparing the patient for awakening

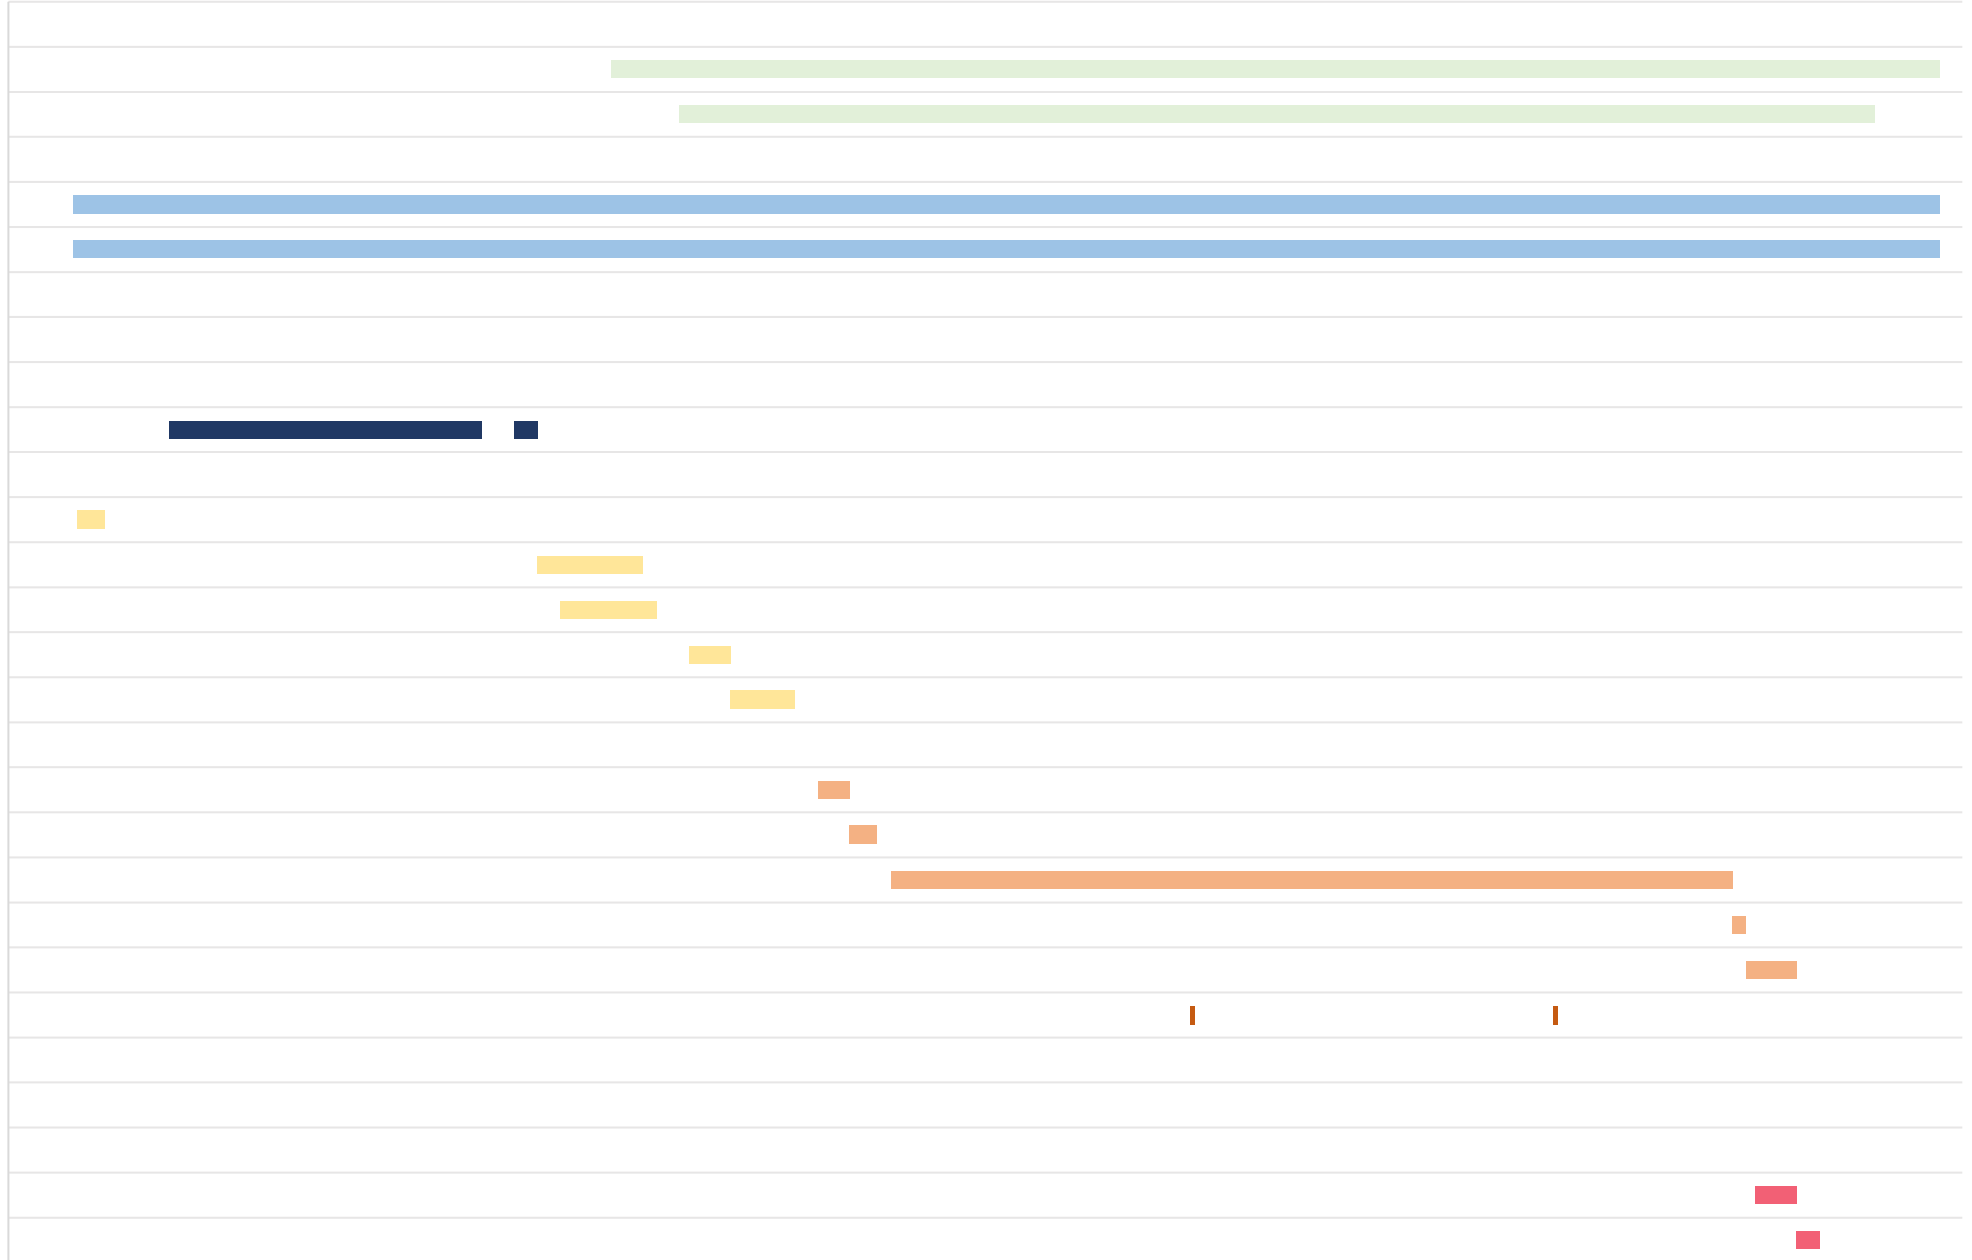

# Surgery 20

07:40

08:52

10:04

11:16

Patient at the OR room

Patient under anesthesia

Scrub Nurse

Circulating Nurse

Supervised Circulating Nurse

Nurses released for a break

Nurse leaves OR room

Starting the robotic system

Unpacking of equipment

Draping of the robotic arms

Positioning of the patient

Preparation of the surgical field

Port Placement

Docking

Console Time

Undocking

Skin Closure

Change of instruments

Rinse of camera lens

Technical Errors

Equipment clean up

Preparing the patient for awakening

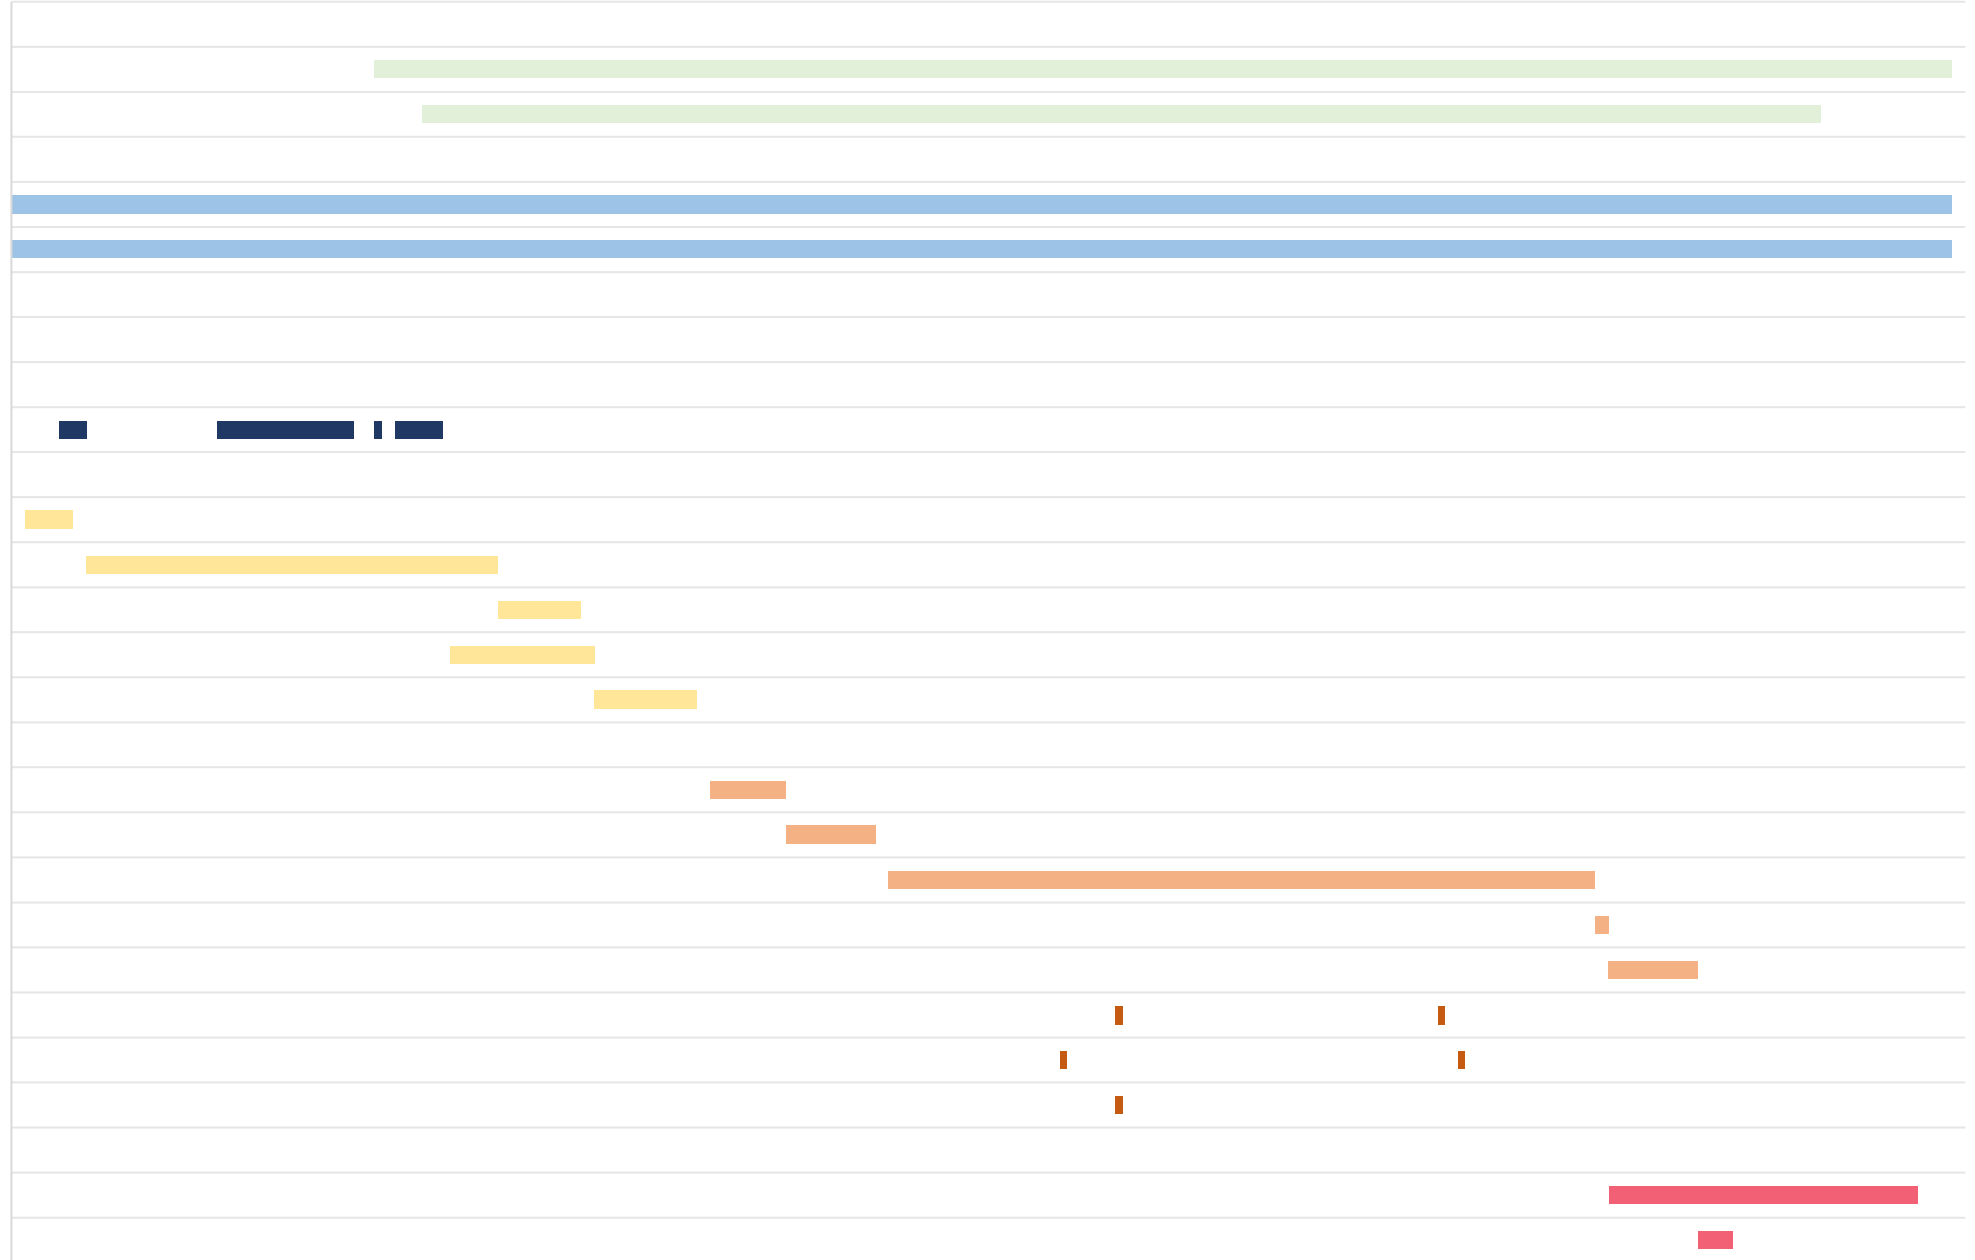

# Surgery 21

07:40

08:52

10:04

11:16

12:28

Patient at the OR room

Patient under anesthesia

Scrub Nurse

Circulating Nurse

Supervised Circulating Nurse

Nurses released for a break

Nurse leaves OR room

Starting the robotic system

Unpacking of equipment

Draping of the robotic arms

Positioning of the patient

Preparation of the surgical field

Port Placement

Docking

Console Time

Undocking

Skin Closure

Change of instruments

Rinse of camera lens

Technical Errors

Equipment clean up

Preparing the patient for awakening

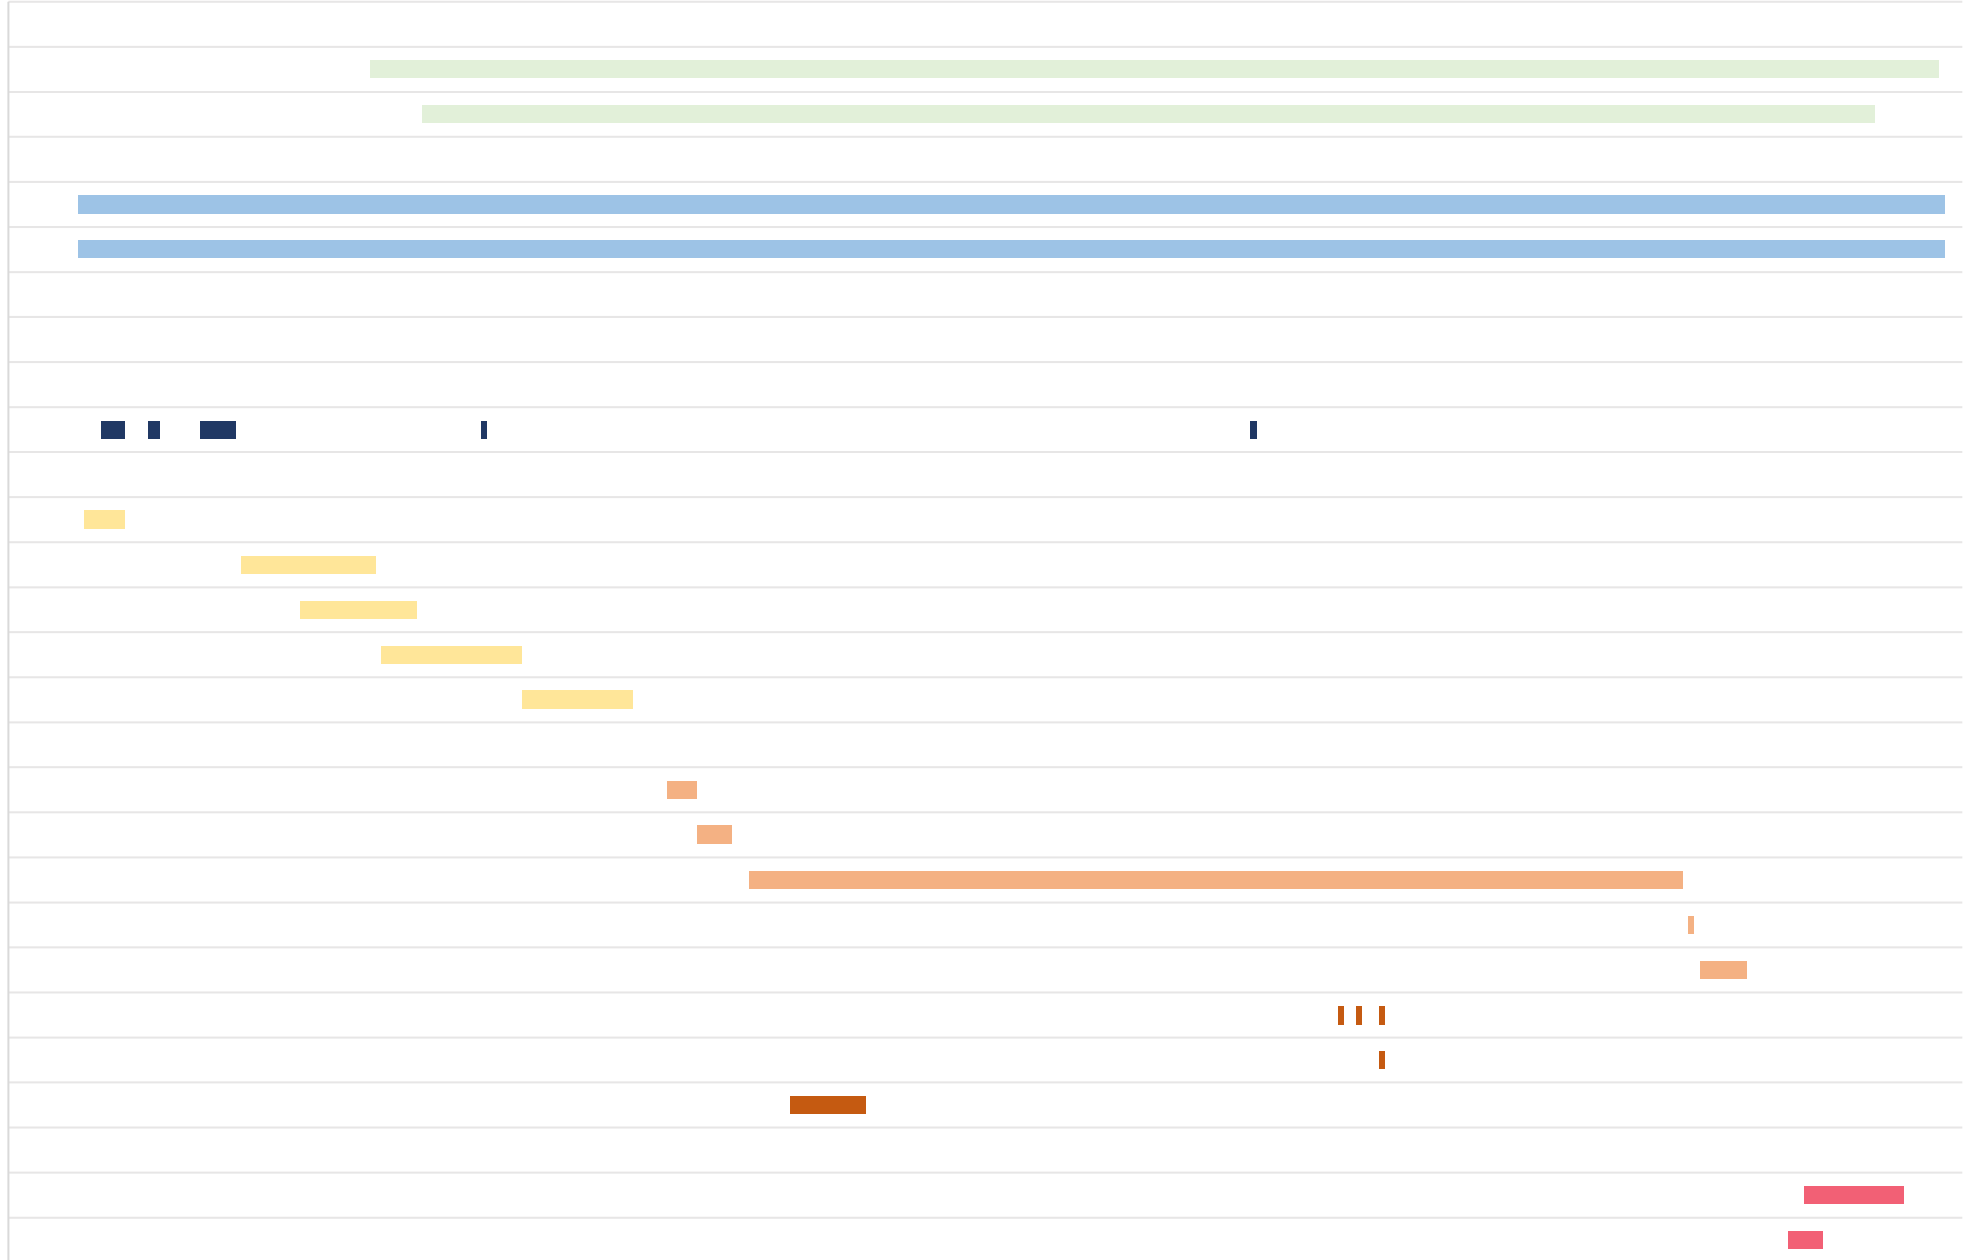

# Surgery 22

07:40

08:52

10:04

11:16

12:28

13:40

- Patient at the OR room
- Patient under anesthesia
- Scrub Nurse
- Circulating Nurse
- Supervised Circulating Nurse
- Nurses released for a break
- Nurse leaves OR room
- Starting the robotic system
- Unpacking of equipment
- Draping of the robotic arms
- Positioning of the patient
- Preparation of the surgical field
- Port Placement
- Docking
- Console Time
- Undocking
- Skin Closure
- Change of instruments
- Rinse of camera lens
- Technical Errors
- Equipment clean up
- Preparing the patient for awakening

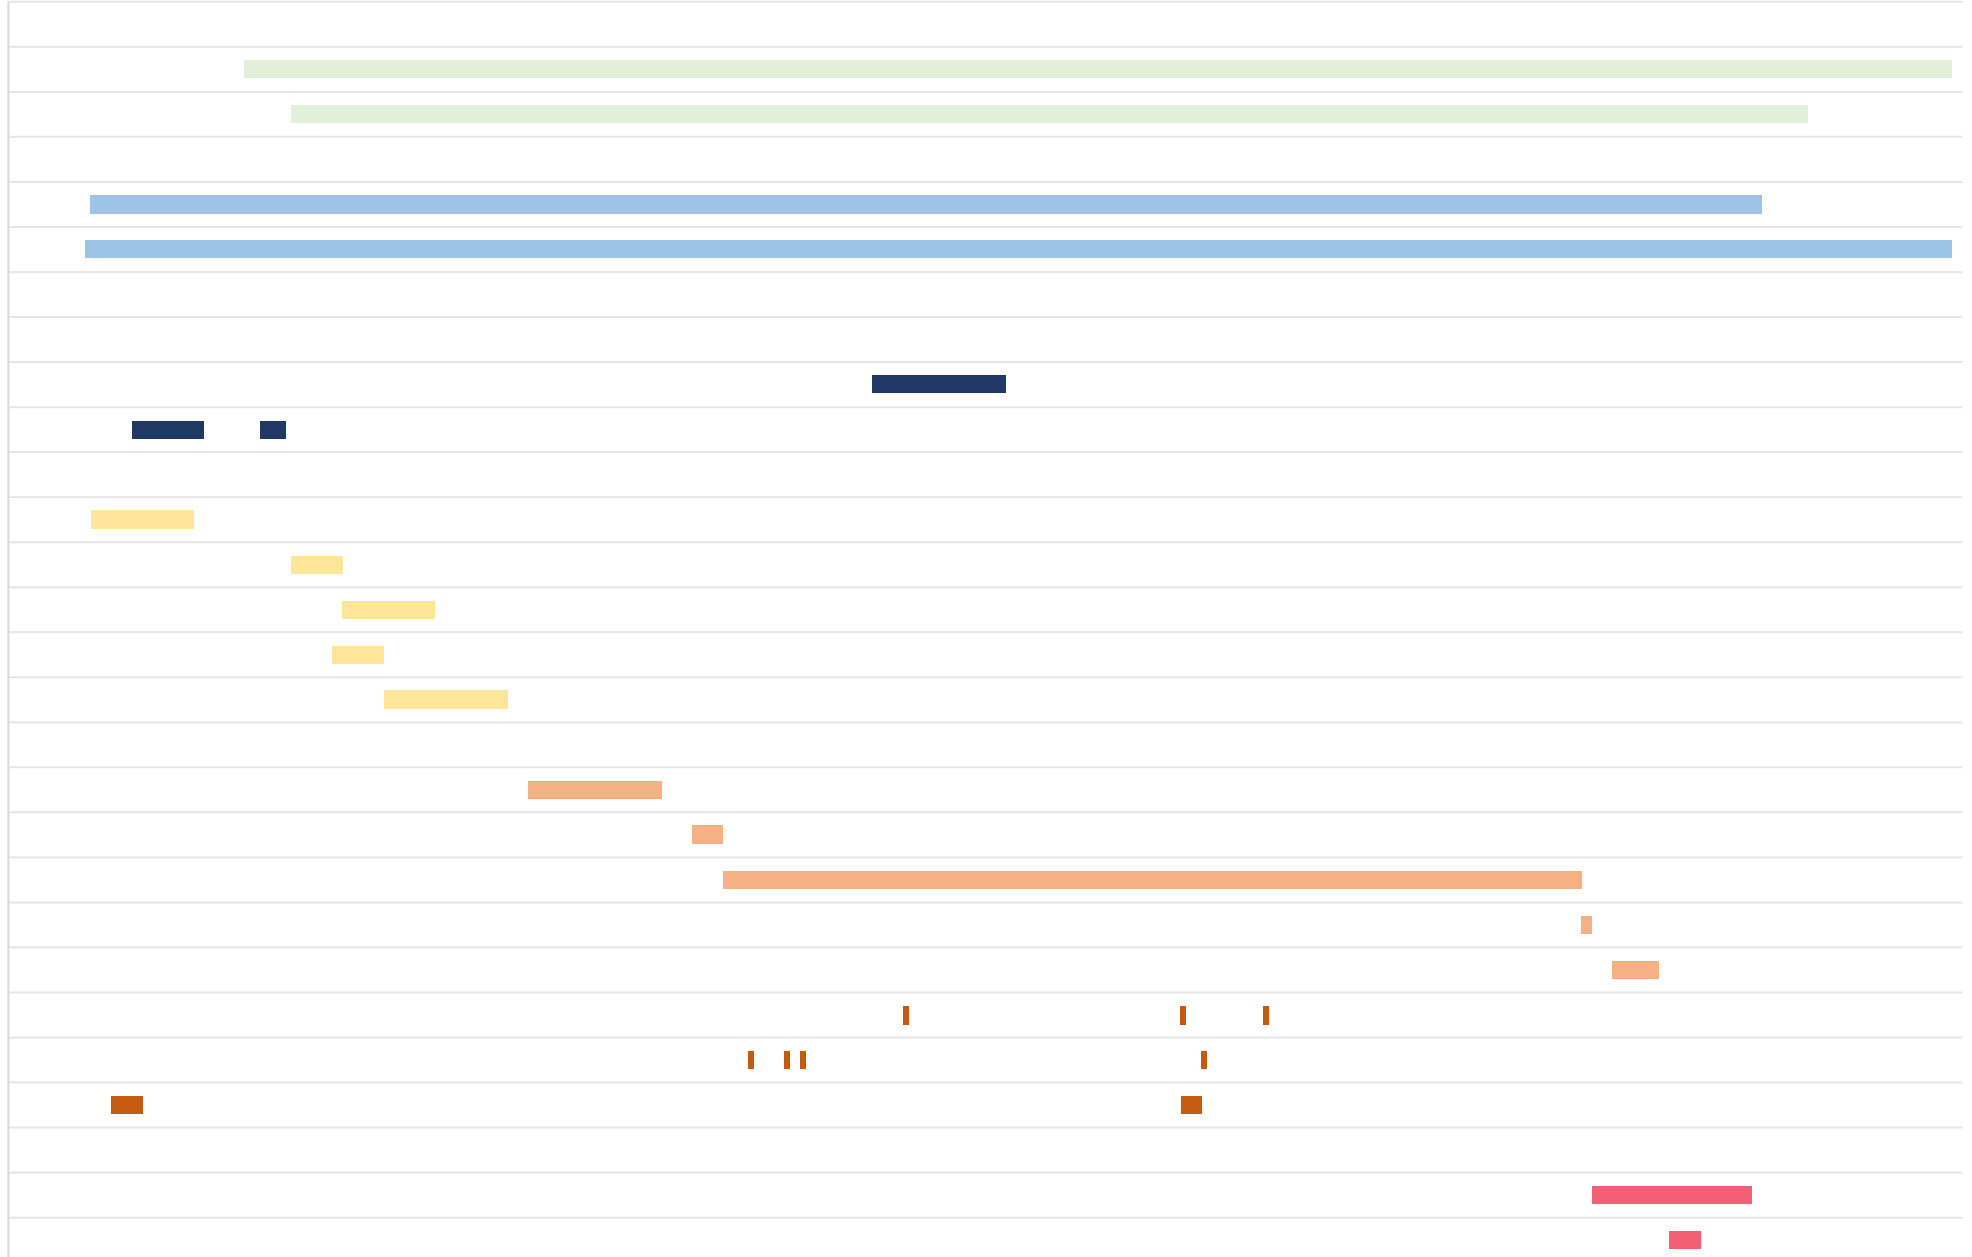

# Surgery 23

07:40

08:52

10:04

11:16

12:28

Patient at the OR room

Patient under anesthesia

Scrub Nurse

Circulating Nurse

Supervised Circulating Nurse

Nurses released for a break

Nurse leaves OR room

Starting the robotic system

Unpacking of equipment

Draping of the robotic arms

Positioning of the patient

Preparation of the surgical field

Port Placement

Docking

Console Time

Undocking

Skin Closure

Change of instruments

Rinse of camera lens

Technical Errors

Equipment clean up

Preparing the patient for awakening

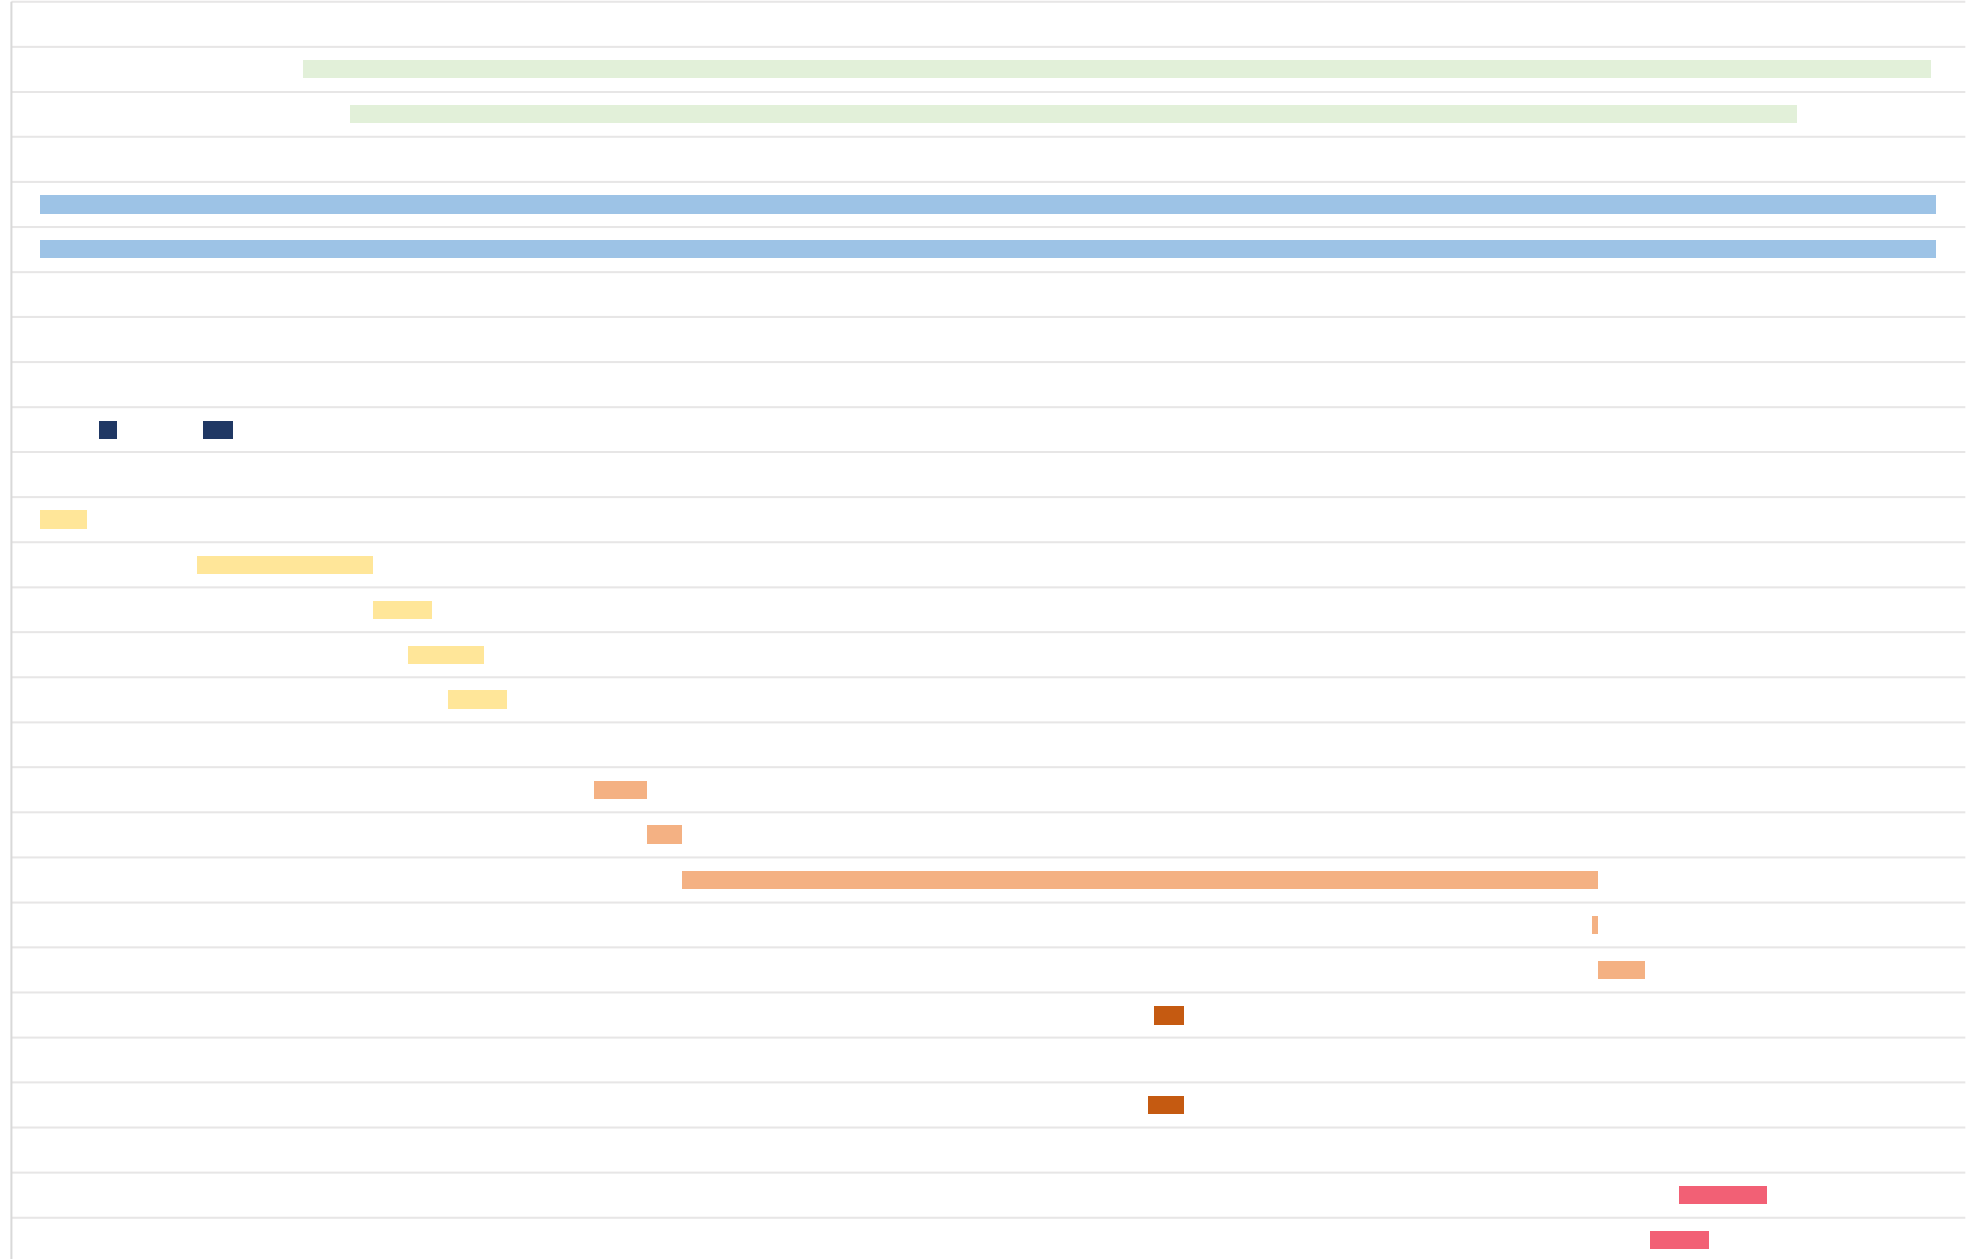



# Surgery 24

07:40

08:52

10:04

11:16

12:28

Patient at the OR room

Patient under anesthesia

Scrub Nurse

Circulating Nurse

Supervised Circulating Nurse

Nurses released for a break

Nurse leaves OR room

Starting the robotic system

Unpacking of equipment

Draping of the robotic arms

Positioning of the patient

Preparation of the surgical field

Port Placement

Docking

Console Time

Undocking

Skin Closure

Change of instruments

Rinse of camera lens

Technical Errors

Equipment clean up

Preparing the patient for awakening

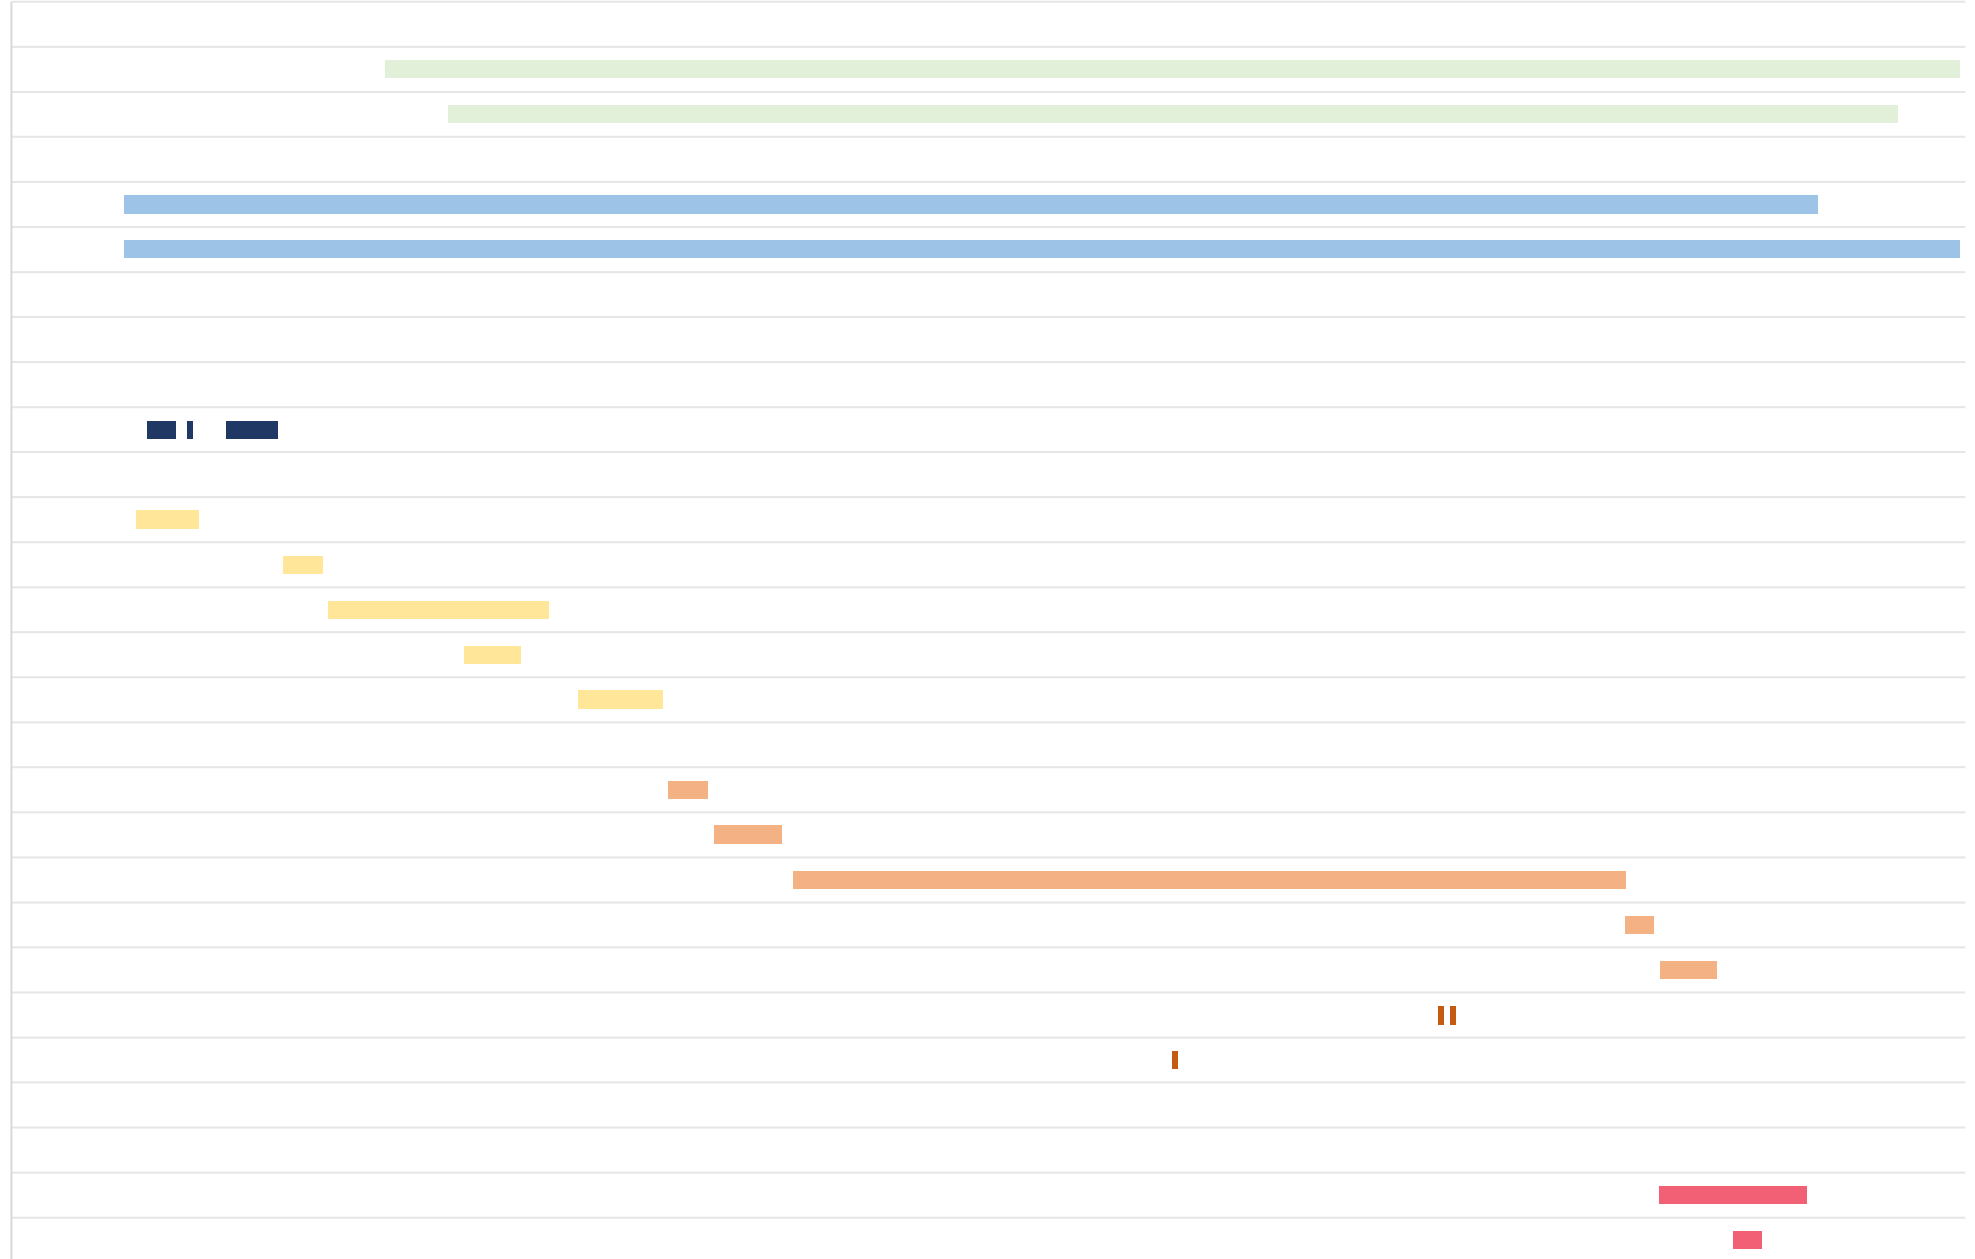

# Surgery 25

07:40

08:52

10:04

11:16

12:28

13:40

Patient at the OR room

Patient under anesthesia

Scrub Nurse

Circulating Nurse

Supervised Circulating Nurse

Nurses released for a break

Nurse leaves OR room

Starting the robotic system

Unpacking of equipment

Draping of the robotic arms

Positioning of the patient

Preparation of the surgical field

Port Placement

Docking

Console Time

Undocking

Skin Closure

Change of instruments

Rinse of camera lens

Technical Errors

Equipment clean up

Preparing the patient for awakening

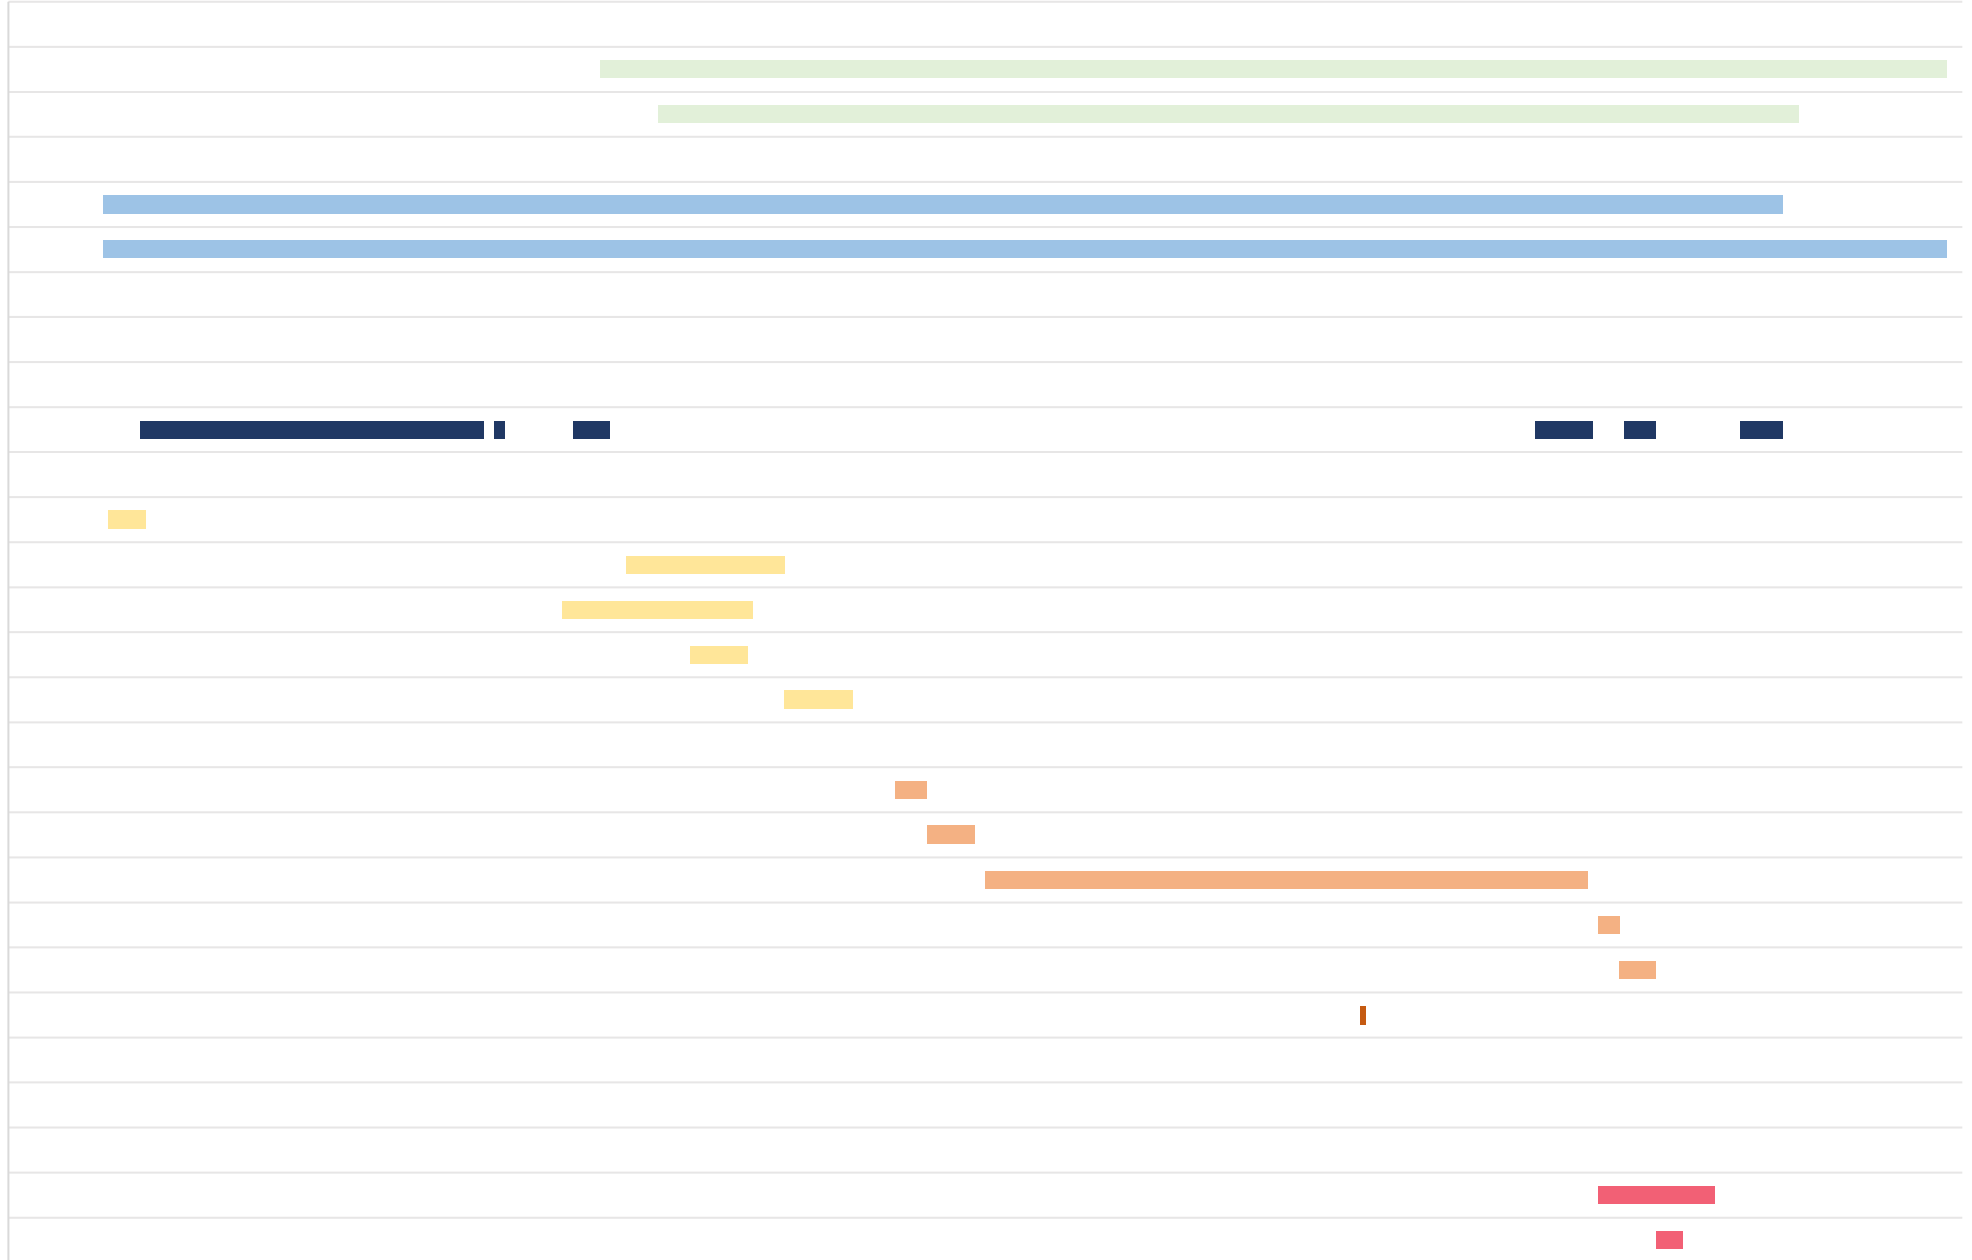

# Surgery 26

08:30                      09:42                      10:54                      12:06                      13:18                      14:30                      15:42

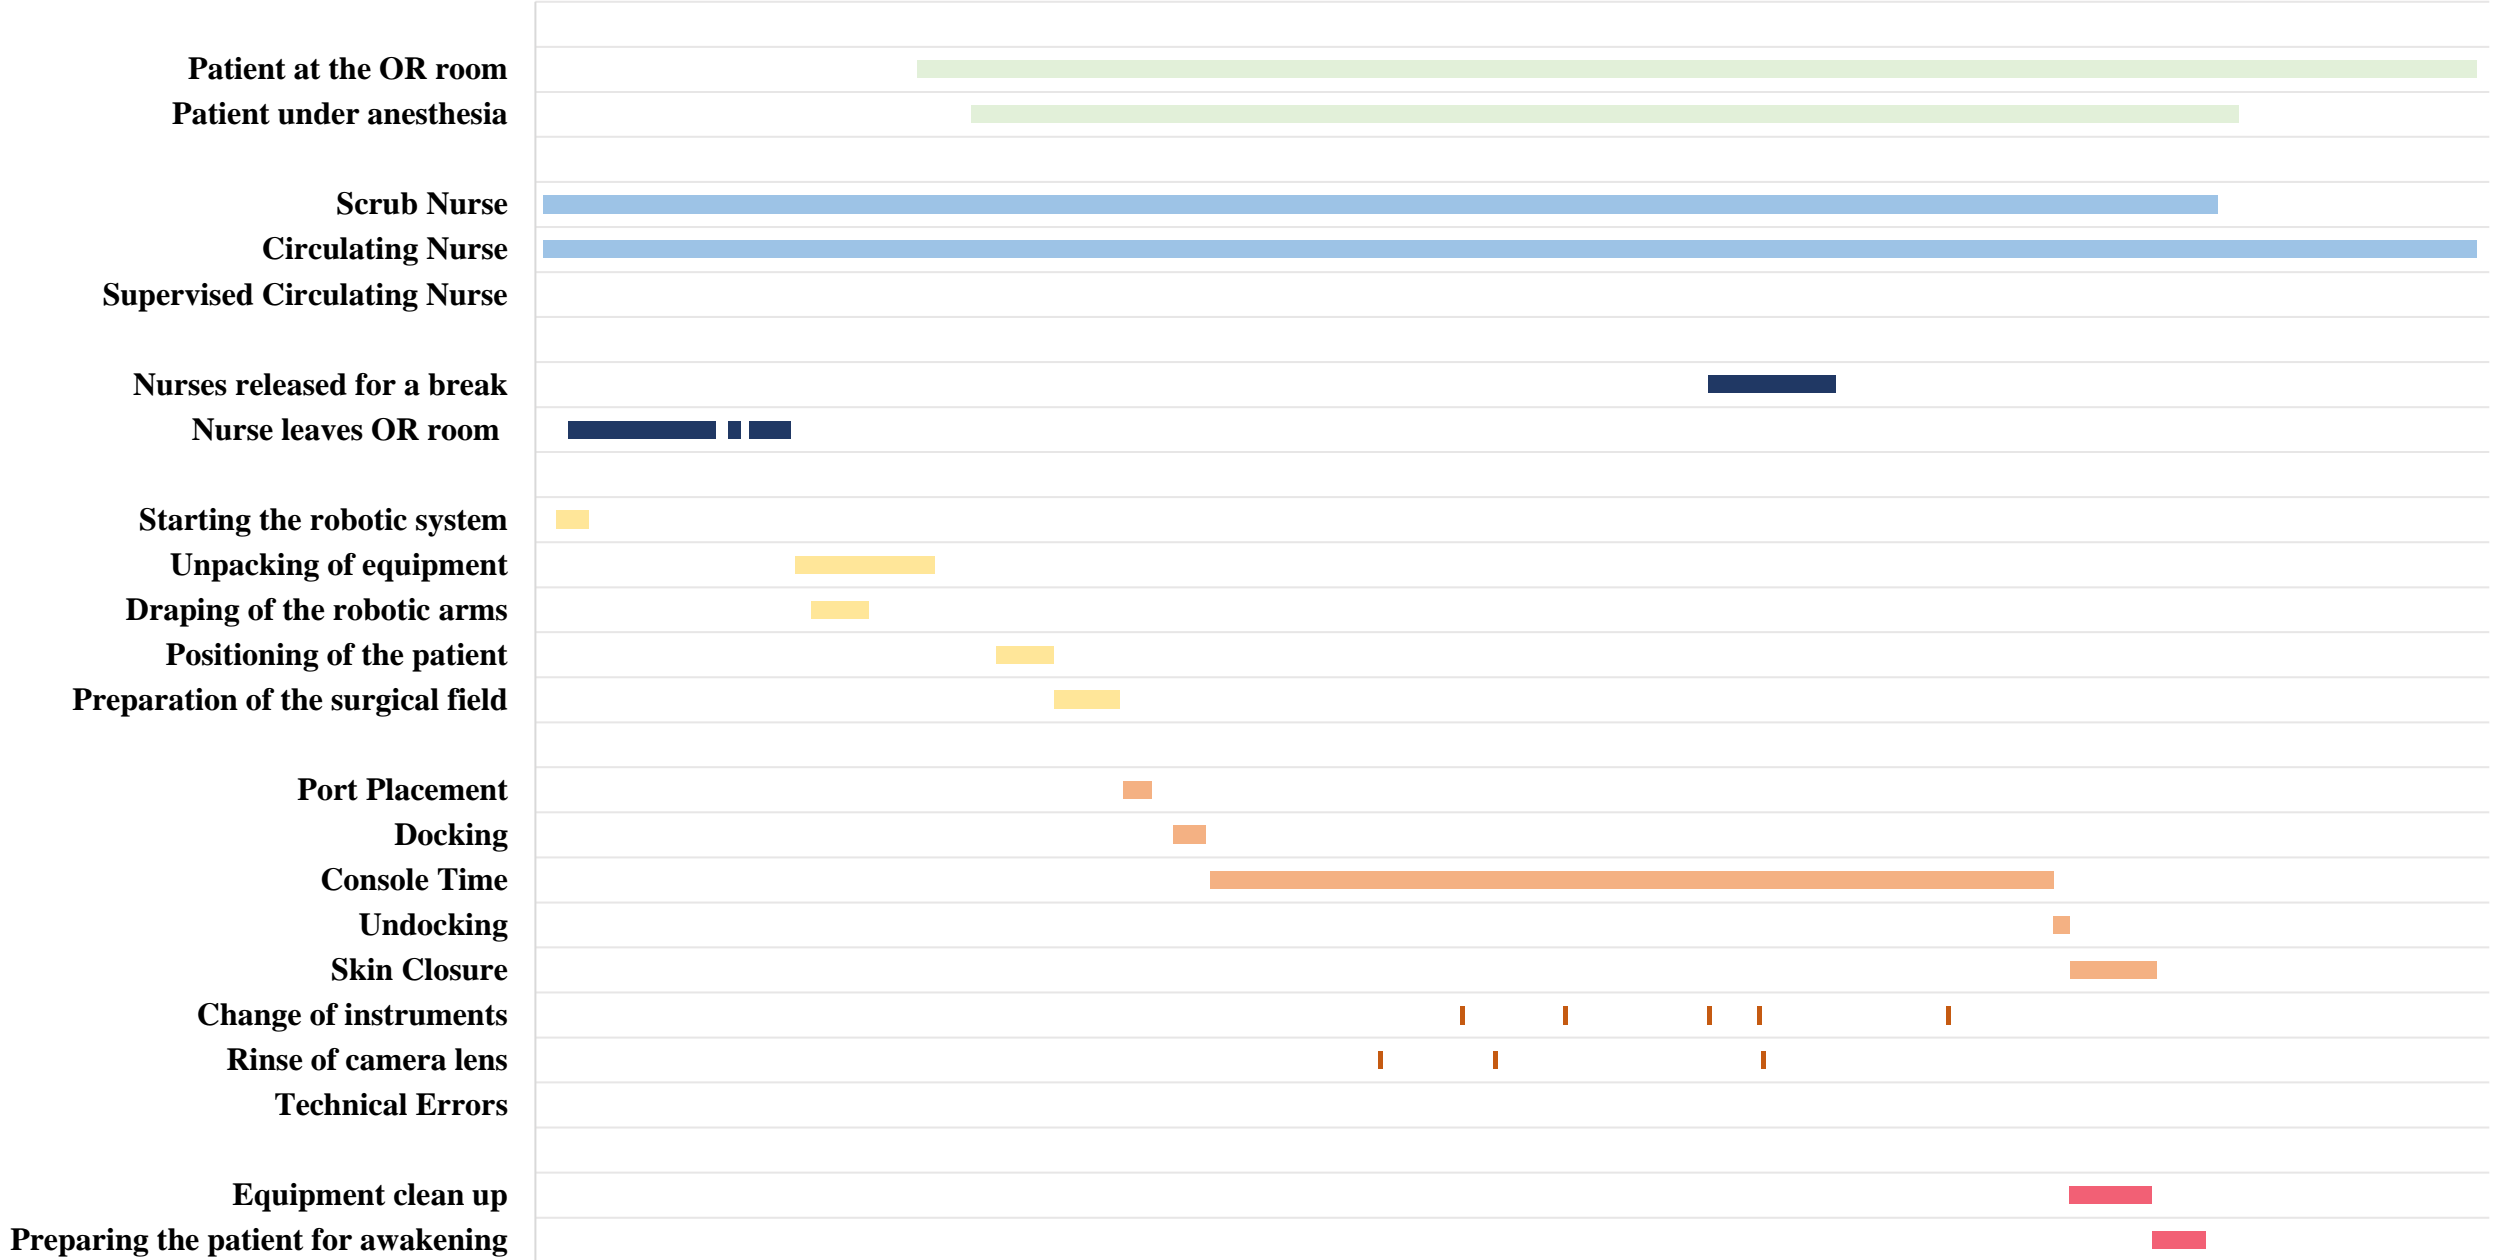

# Surgery 27

07:40

08:52

10:04

11:16

12:28

13:40

Patient at the OR room

Patient under anesthesia

Scrub Nurse

Circulating Nurse

Supervised Circulating Nurse

Nurses released for a break

Nurse leaves OR room

Starting the robotic system

Unpacking of equipment

Draping of the robotic arms

Positioning of the patient

Preparation of the surgical field

Port Placement

Docking

Console Time

Undocking

Skin Closure

Change of instruments

Rinse of camera lens

Technical Errors

Equipment clean up

Preparing the patient for awakening

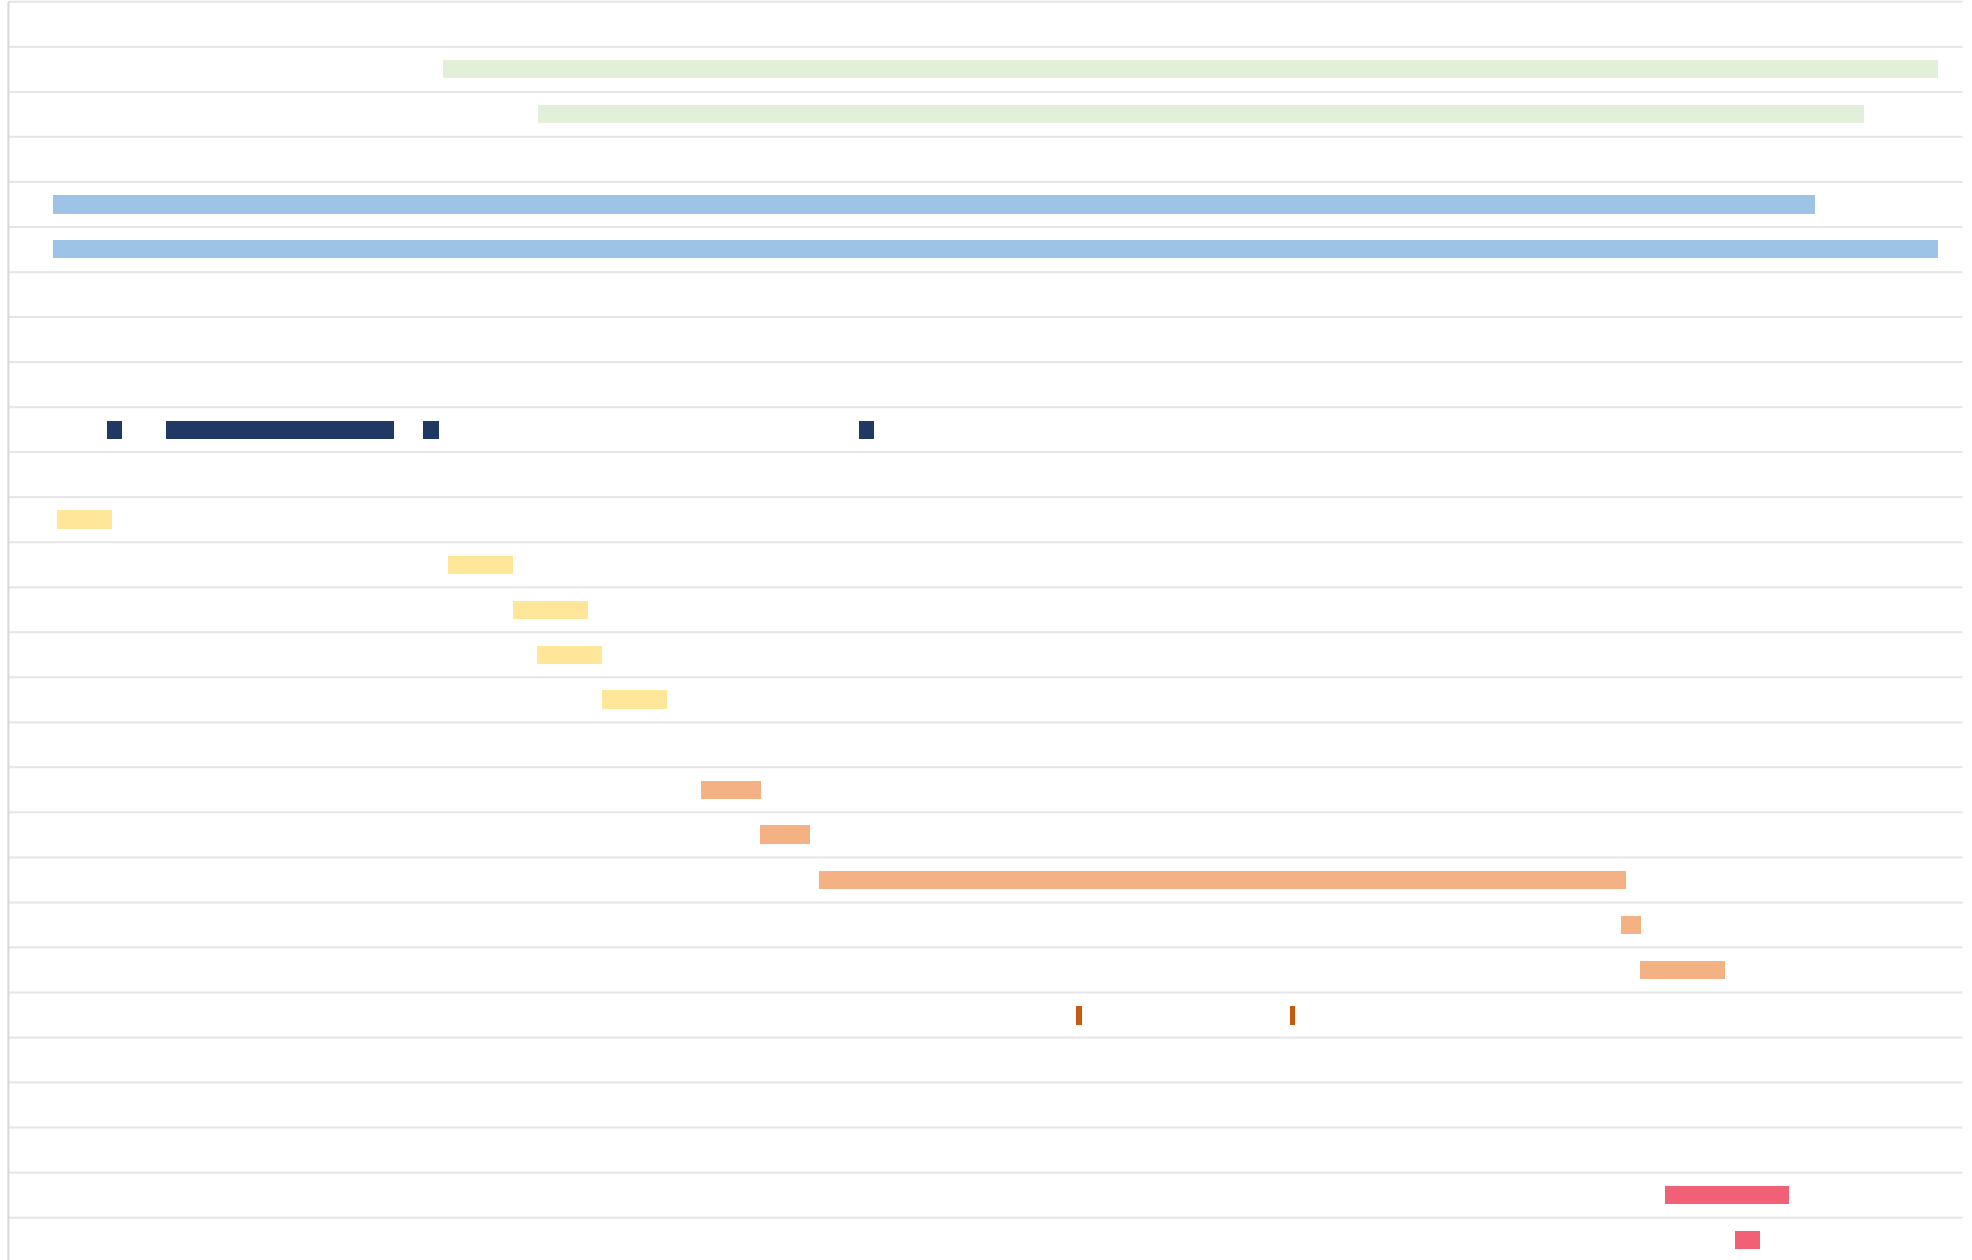

# Surgery 28

07:40

08:52

10:04

11:16

12:28

- Patient at the OR room
- Patient under anesthesia
- Scrub Nurse
- Circulating Nurse
- Supervised Circulating Nurse
- Nurses released for a break
- Nurse leaves OR room
- Starting the robotic system
- Unpacking of equipment
- Draping of the robotic arms
- Positioning of the patient
- Preparation of the surgical field
- Port Placement
- Docking
- Console Time
- Undocking
- Skin Closure
- Change of instruments
- Rinse of camera lens
- Technical Errors
- Equipment clean up
- Preparing the patient for awakening

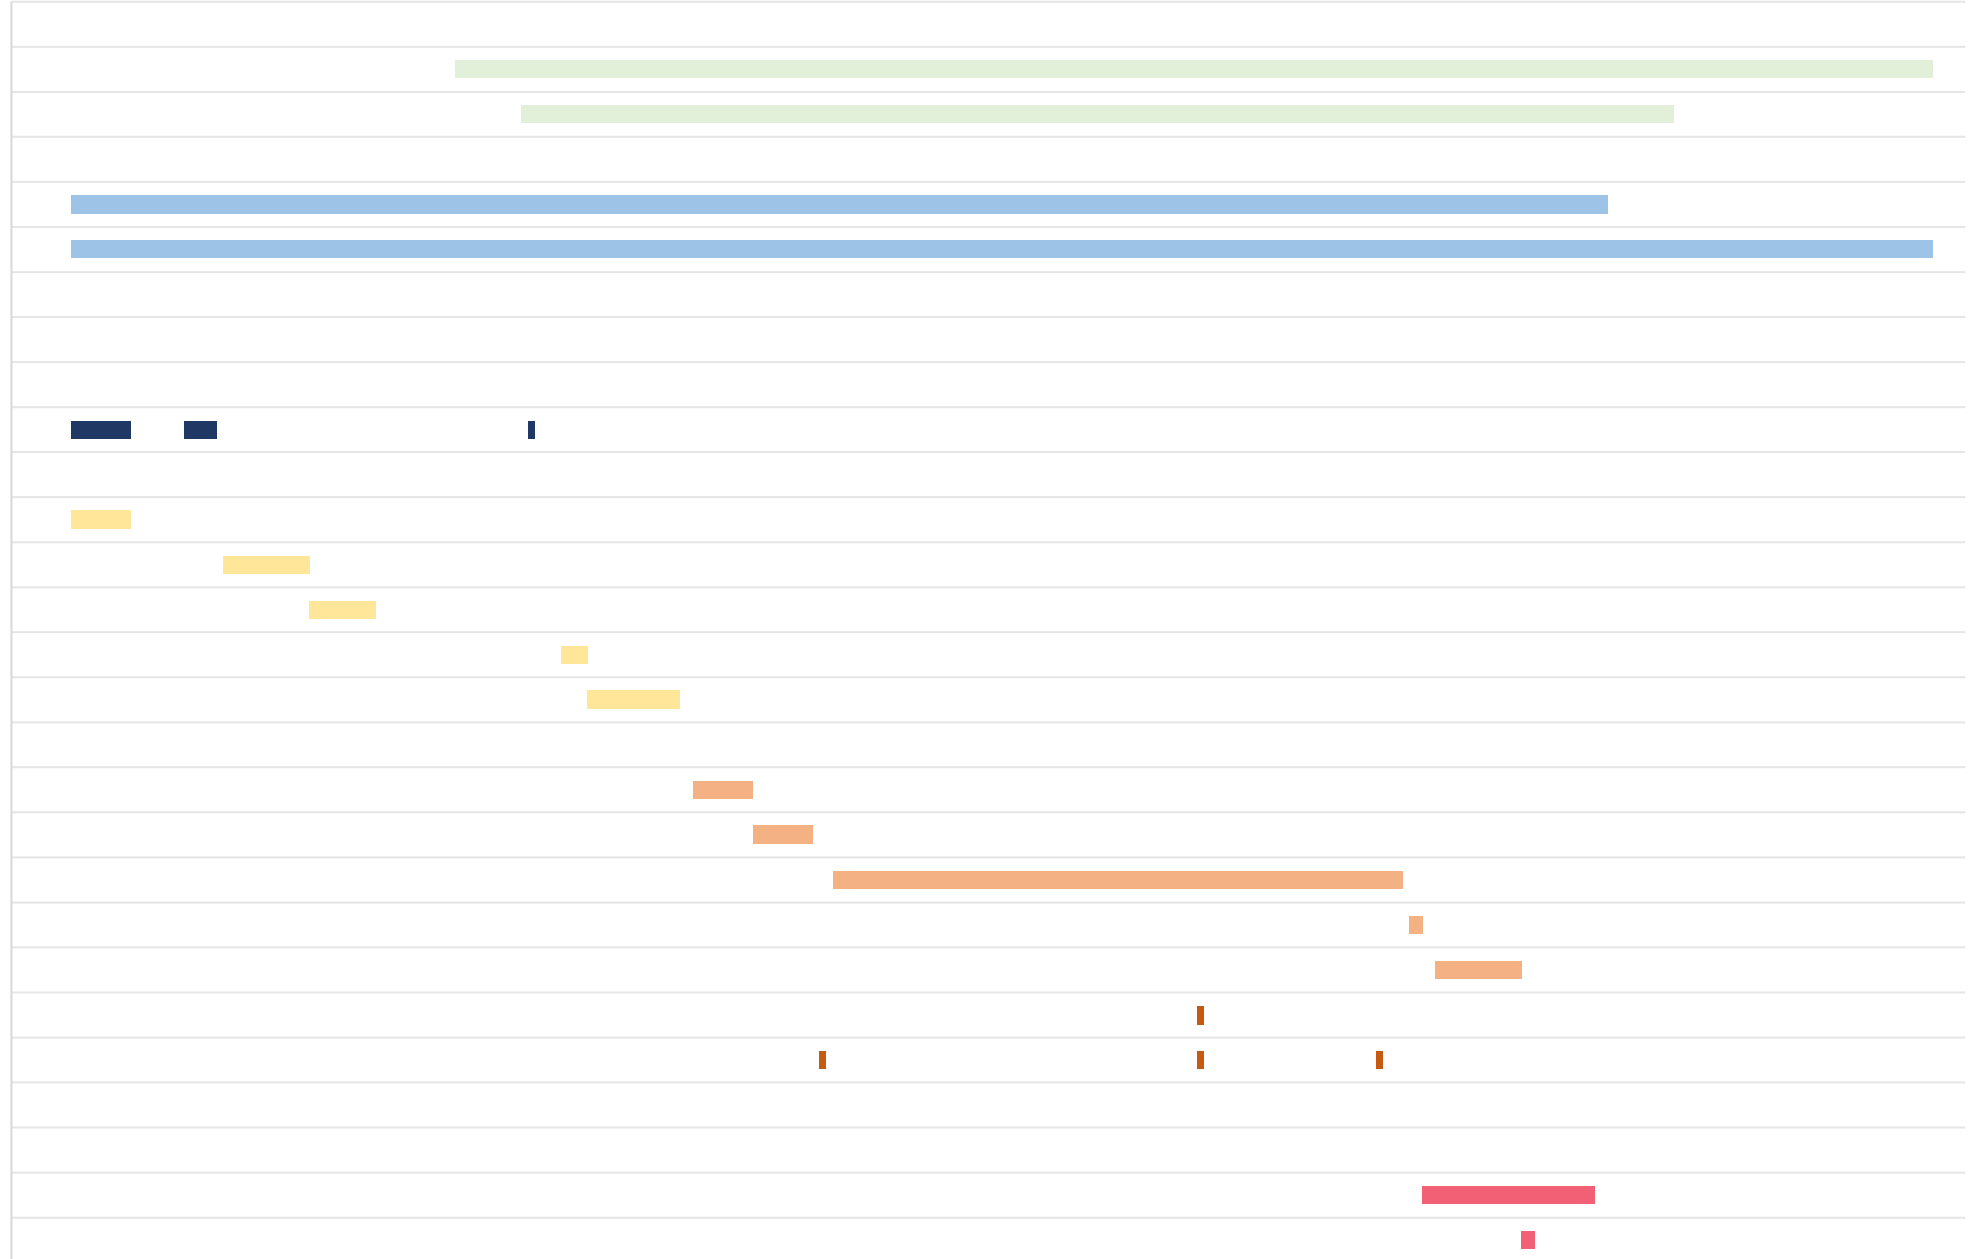

# Surgery 29

07:40

08:52

10:04

11:16

12:28

13:40

Patient at the OR room

Patient under anesthesia

Scrub Nurse

Circulating Nurse

Supervised Circulating Nurse

Nurses released for a break

Nurse leaves OR room

Starting the robotic system

Unpacking of equipment

Draping of the robotic arms

Positioning of the patient

Preparation of the surgical field

Port Placement

Docking

Console Time

Undocking

Skin Closure

Change of instruments

Rinse of camera lens

Technical Errors

Equipment clean up

Preparing the patient for awakening

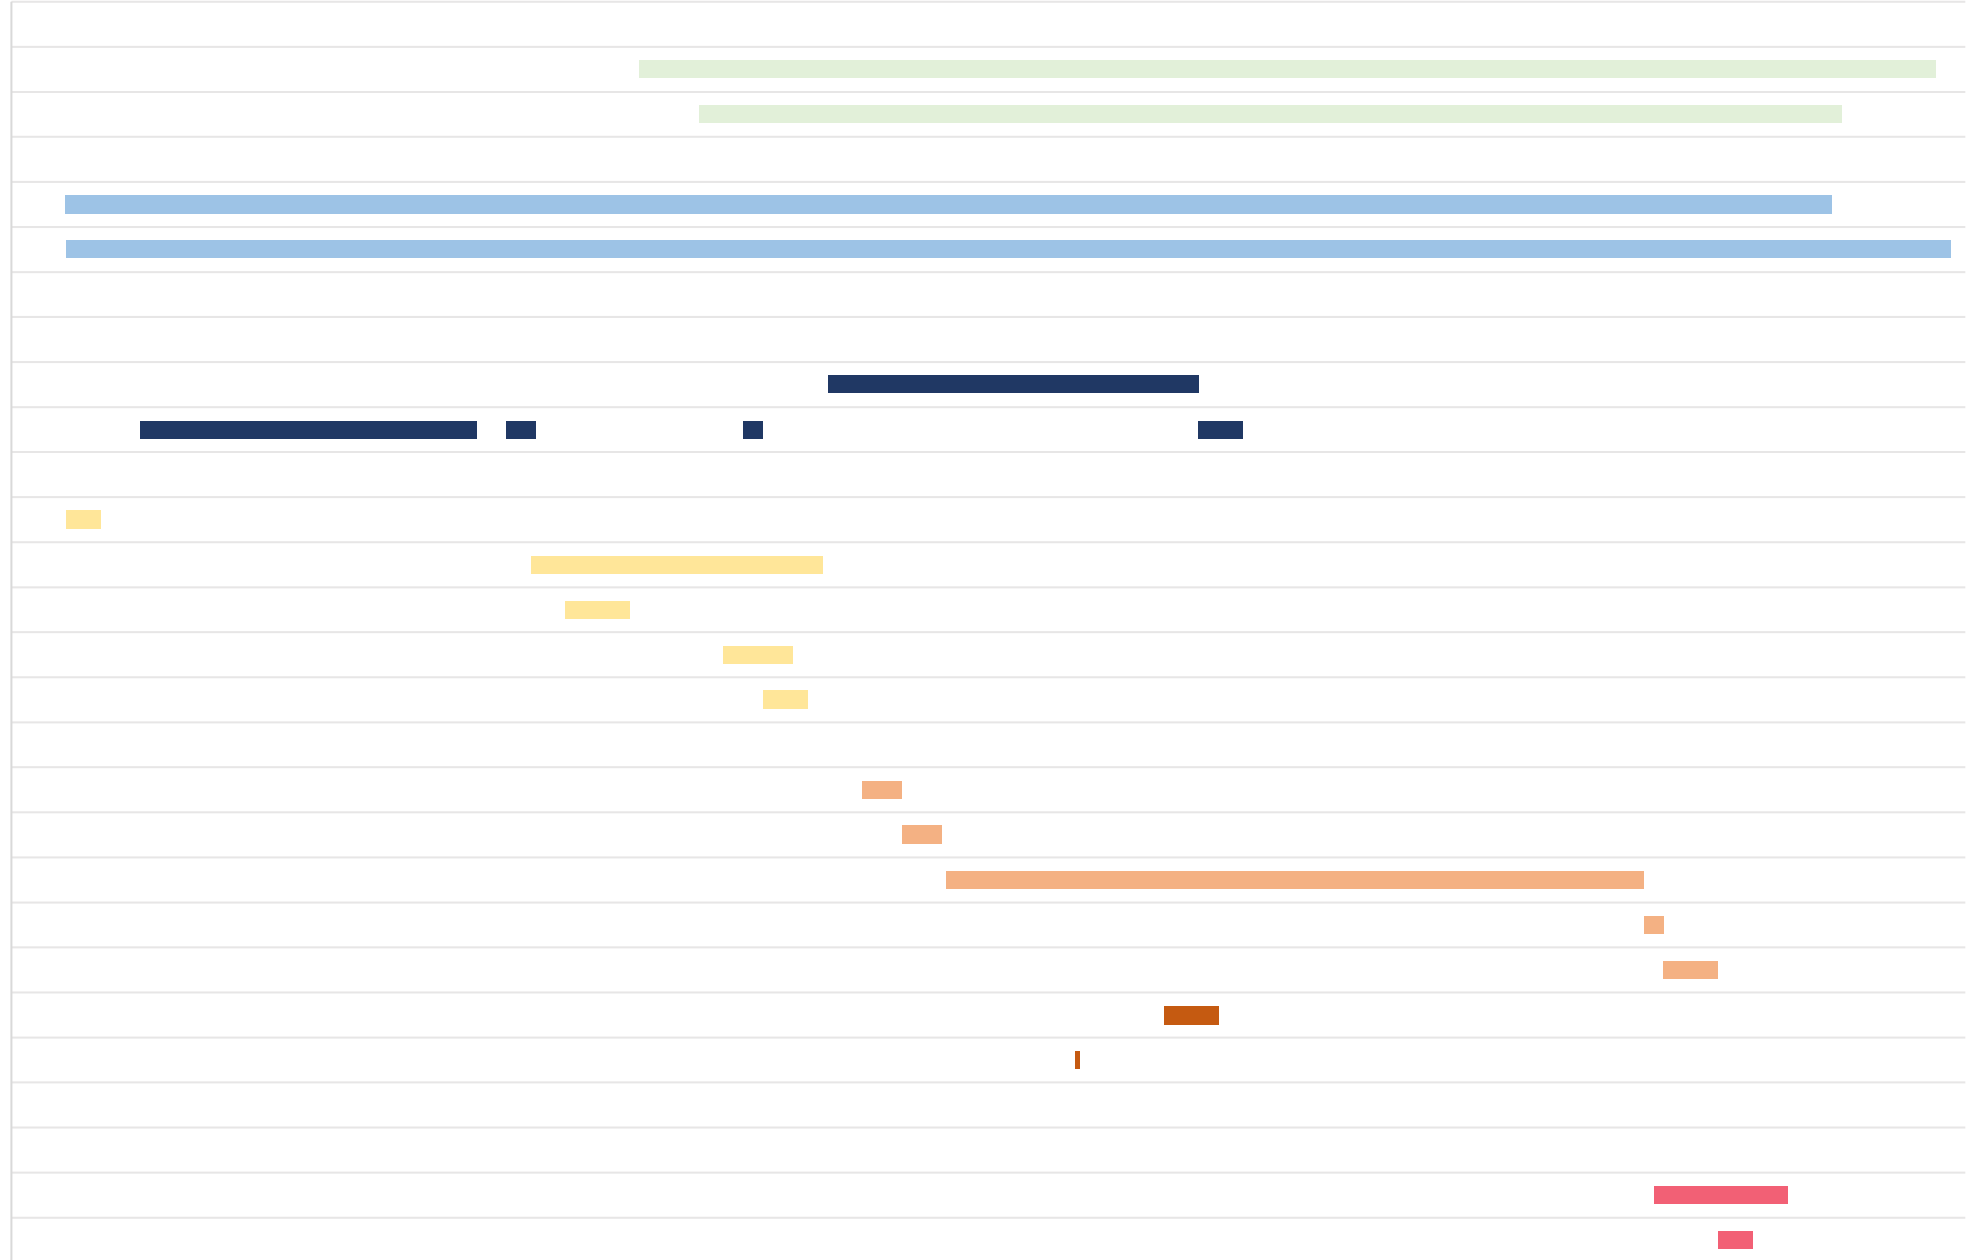

# Surgery 30

07:40

08:52

10:04

11:16

12:28

Patient at the OR room

Patient under anesthesia

Scrub Nurse

Circulating Nurse

Supervised Circulating Nurse

Nurses released for a break

Nurse leaves OR room

Starting the robotic system

Unpacking of equipment

Draping of the robotic arms

Positioning of the patient

Preparation of the surgical field

Port Placement

Docking

Console Time

Undocking

Skin Closure

Change of instruments

Rinse of camera lens

Technical Errors

Equipment clean up

Preparing the patient for awakening

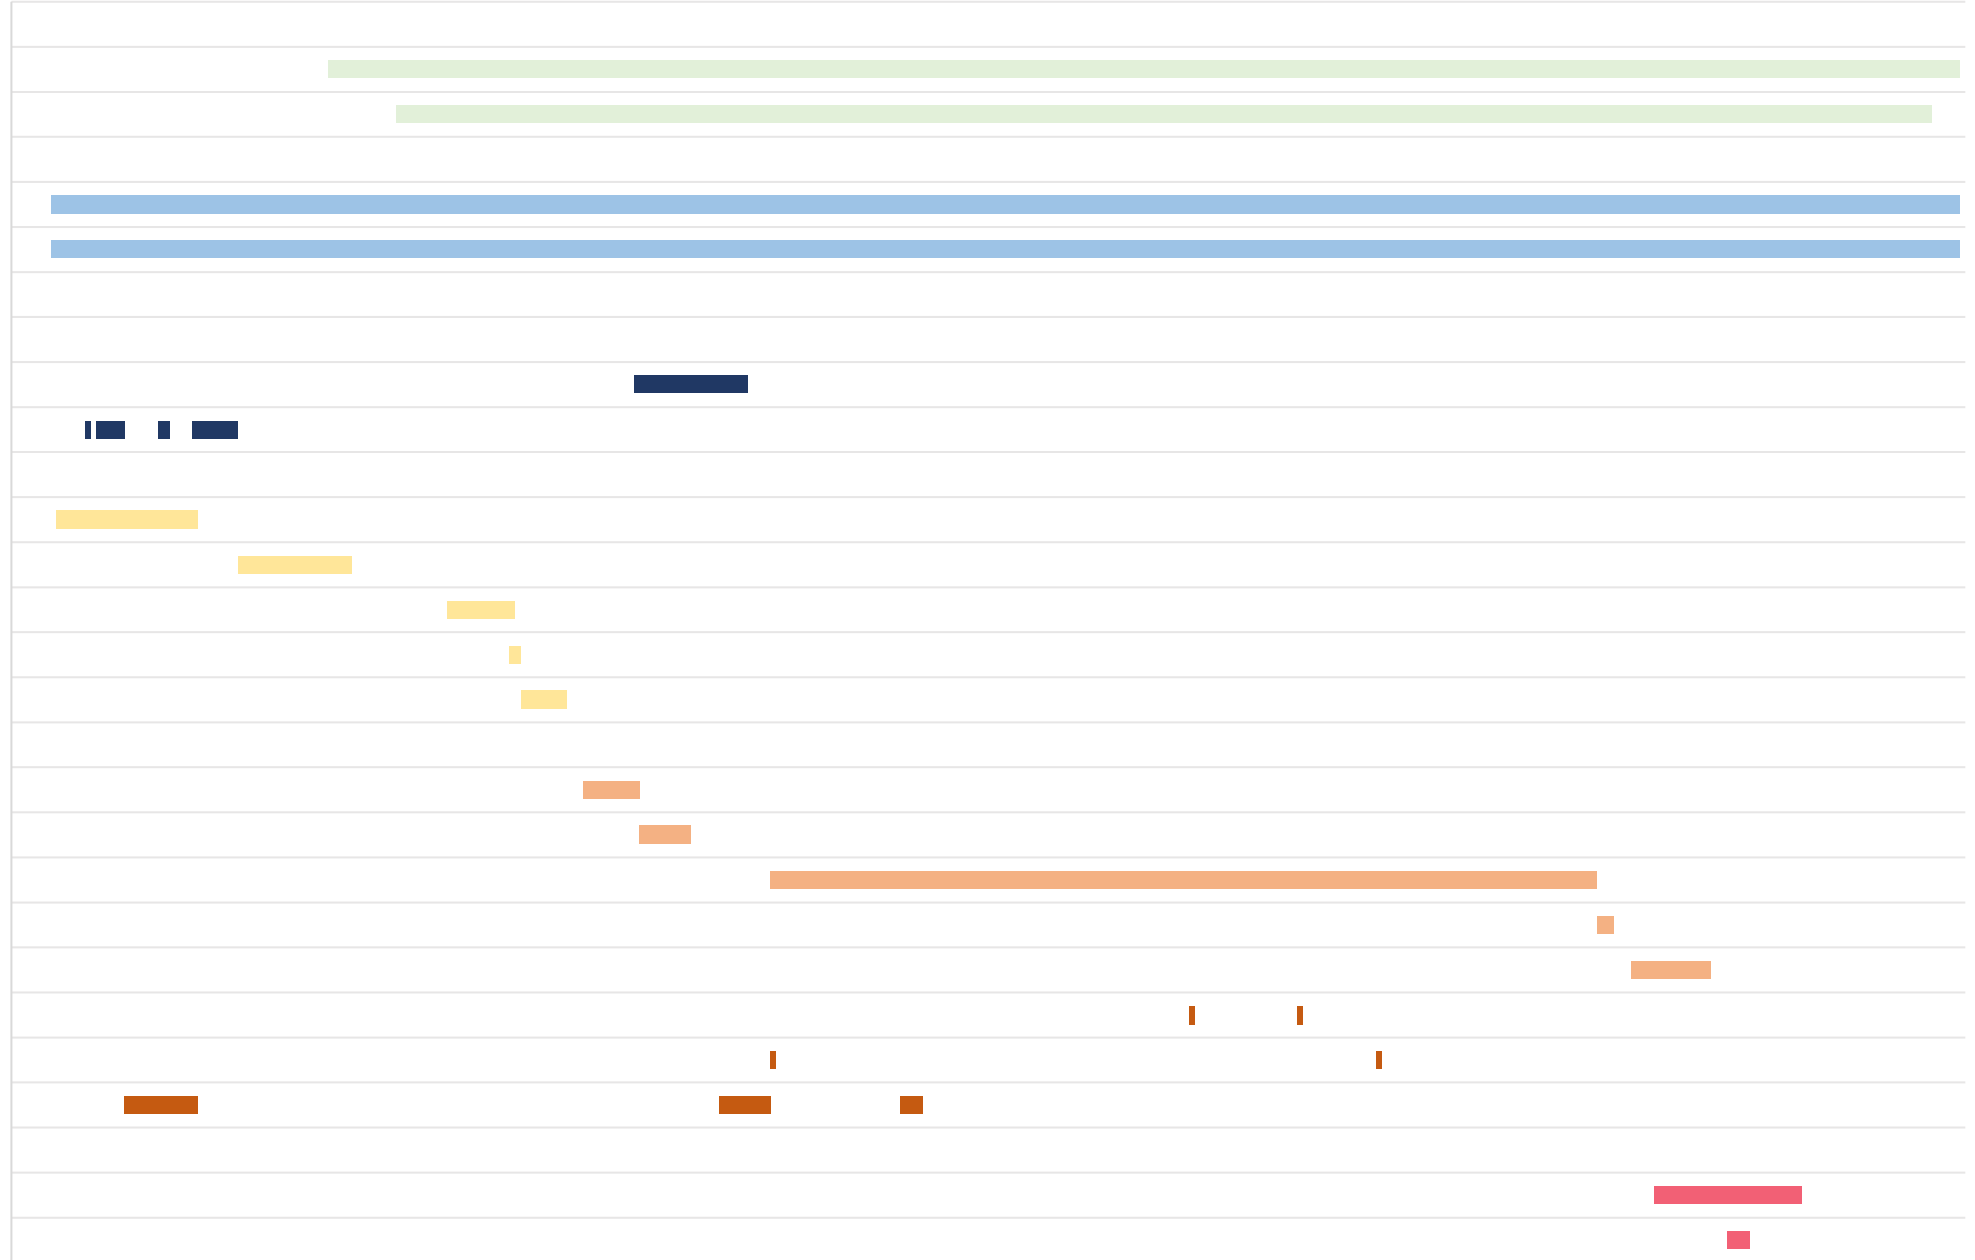

Supplement: MOESM1 [file 26840260]
